# Supplementary material
Source: PubMed Central journal article supplement (PMC5053896)

# Supporting Information

for

## **Stereocontrolled Total Synthesis of Muraymycin D<sub>1</sub> Having a Dual Mode of Action against *Mycobacterium tuberculosis***

Katsuhiko Mitachi, Bilal A. Alewi, Christopher M. Schneider, Shajila Siricilla and  
Michio Kurosu\*

Department of Pharmaceutical Sciences, College of Pharmacy, University of Tennessee Health  
Science Center, 881 Madison, Memphis, TN 38163-0001, United States

[mkurosu@uthsc.edu](mailto:mkurosu@uthsc.edu)

### Table of Contents

|                                       |         |
|---------------------------------------|---------|
| Table of contents-----                | S1      |
| General -----                         | S2      |
| Experimental -----                    | S3-S28  |
| Copies of 1H and 13C NMR spectra----- | S29-S93 |

## General

All chemicals were purchased from commercial sources and used without further purification unless otherwise noted. Tetrahydrofuran (THF), methylene chloride ( $\text{CH}_2\text{Cl}_2$ ), and DMF were purified via Innovative Technology's Pure-Solve System. All reactions were performed under an Argon atmosphere. All stirring was performed with an internal magnetic stirrer. Reactions were monitored by thin-layer chromatography (TLC) performed with 0.25 mm coated commercial silica gel plates (EMD, Silica Gel 60F<sub>254</sub>) using UV light for visualization at 254 nm, or developed with ceric ammonium molybdate or anisaldehyde or copper sulfate or ninhydrin solutions by heating on a hot plate. Reactions were also monitored by using SHIMADZU LCMS-2020 with solvents: A: 0.1% formic acid in water, B: acetonitrile. And reactions were also monitored by SHIMADZU prominence HPLC using Phenomenex Kinetex 1.7  $\mu$  XB-C18 100A column (150 x 2.10 mm) and monitoring at 220, 254 nm with solvents: A: 0.05 M ammonium bicarbonate in water, B: methanol. Flash chromatography was performed with SiliCycle silica gel (Purasil 60 Å, 230-400 Mesh). Proton magnetic resonance ( $^1\text{H}$ -NMR) spectral data were recorded on 400, and 500 MHz instruments. Carbon magnetic resonance ( $^{13}\text{C}$ -NMR) spectral data were recorded on 100 and 125 MHz instruments. For all NMR spectra, chemical shifts ( $\delta\text{H}$ ,  $\delta\text{C}$ ) were quoted in parts per million (ppm), and J values were quoted in Hz.  $^1\text{H}$  and  $^{13}\text{C}$  NMR spectra were calibrated with residual undeuterated solvent ( $\text{CDCl}_3$ :  $\delta\text{H}$  =7.26 ppm,  $\delta\text{C}$  =77.16ppm;  $\text{CD}_3\text{CN}$ :  $\delta\text{H}$ =1.94ppm,  $\delta\text{C}$  =1.32ppm;  $\text{CD}_3\text{OD}$ :  $\delta\text{H}$  =3.31ppm,  $\delta\text{C}$  =49.00 ppm;  $\text{DMSO-d}_6$ :  $\delta\text{H}$ =2.50ppm,  $\delta\text{C}$  =39.52ppm;  $\text{D}_2\text{O}$ :  $\delta\text{H}$ =4.79 ppm) as an internal reference. The following abbreviations were used to designate the multiplicities: s=singlet, d=doublet, dd=double doublets, t=triplet, q=quartet, quin=quintet, hept=heptet, m=multiplet, br=broad. Infrared (IR) spectra were recorded on a Perkin-Elmer FT1600 spectrometer.

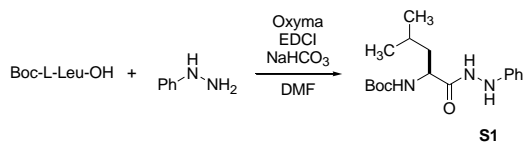

To a stirred solution of Boc-L-Leu-OH·H<sub>2</sub>O (7.48 g, 30 mmol), phenylhydrazine (4.43 mL, 45 mmol), NaHCO<sub>3</sub> (25.2 g, 300 mmol) and oxyma (3.69 g, 45 mmol) in DMF (60 mL) was added EDCI (28.8 g, 150 mmol). The reaction mixture was stirred for 15 h at rt, quenched with aq. saturated NaHCO<sub>3</sub>, extracted with EtOAc. The combined organic extracts were washed with 1M HCl, brine, dried over Na<sub>2</sub>SO<sub>4</sub> and concentrated in vacuo. The crude mixture was purified by silica gel column chromatography (Hexanes/EtOAc 80:20 to 70:30) to afford **S1** (6.50 g, 20.2 mmol, 67%): TLC (hexanes/EtOAc 67:33) *R<sub>f</sub>* = 0.40; [α]<sup>22</sup><sub>D</sub> -0.528 (*c* = 0.95, CHCl<sub>3</sub>); IR (thin film) *v*<sub>max</sub> = 3278 (br), 2958, 2934, 2871, 1671, 1603, 1497, 1391, 1366, 1252, 1167, 1046, 1026, 750, 692 cm<sup>-1</sup>; <sup>1</sup>H NMR (400 MHz, CDCl<sub>3</sub>) δ 8.31 (brs, 1H), 7.20 (dd, *J* = 8.5, 7.3 Hz, 2H), 6.88 (t, *J* = 7.4 Hz, 1H), 6.82 – 6.78 (m, 2H), 6.12 (brs, 1H), 5.00 (d, *J* = 8.4 Hz, 1H), 4.21 (q, *J* = 7.9 Hz, 1H), 1.72 – 1.66 (m, 2H), 1.55 – 1.49 (m, 1H), 1.46 (s, 9H), 0.95 (d, *J* = 6.1 Hz, 3H), 0.93 (d, *J* = 6.1 Hz, 3H); <sup>13</sup>C NMR (101 MHz, CDCl<sub>3</sub>) δ 172.54, 147.80, 129.13 (2C), 121.16, 113.55 (2C), 51.53, 40.42, 28.33 (3C), 24.72 (2C), 22.78, 22.10; HRMS (ESI+) *m/z* calcd for C<sub>17</sub>H<sub>27</sub>N<sub>3</sub>O<sub>3</sub>Na [M + Na] 344.1950, found 344.1952.

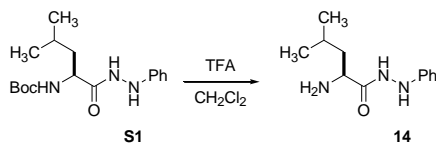

To a stirred solution of **S1** (18.8 g, 58.6 mmol) in CH<sub>2</sub>Cl<sub>2</sub> (41 mL) was added TFA (18 mL). The reaction mixture was stirred for 2 h at rt, and all volatiles were evaporated in vacuo to provide **14** as an oil. The crude mixture was used for the next reaction without purification.

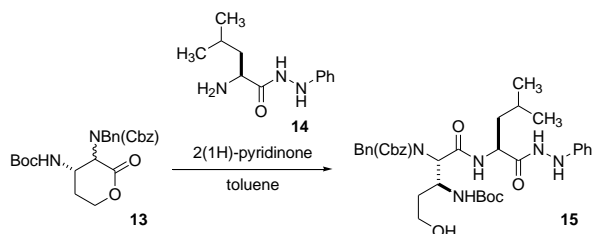

To a stirred solution of **14** and 2-hydroxypyridine (12.6 g, 133 mmol) in toluene (13.3 mL) was added **13**<sup>1</sup> (6.04 g, 13.3 mmol). The reaction mixture was stirred at 70 °C for 3 h and cooled to rt. Purification by silica gel column chromatography (hexanes/EtOAc 50:50 to 40:60) provided **15** (5.01 g, 7.41 mmol, 56%) as a red oil: TLC (hexanes/EtOAc 33:67) *R<sub>f</sub>* = 0.40; [α]<sup>22</sup><sub>D</sub> -0.081 (*c* = 0.79, CHCl<sub>3</sub>); IR (thin film) *v*<sub>max</sub> = 3292 (br), 3032, 2959, 2872, 1685, 1603, 1497, 1469, 1453, 1366, 1252, 1169, 1055, 752, 734, 695 cm<sup>-1</sup>; <sup>1</sup>H NMR (400 MHz, CDCl<sub>3</sub>) δ 8.62 (brs, 1H), 7.36 – 7.30 (m, 9H), 7.27 – 7.23 (m, 2H), 7.19 (dd, *J* = 8.5, 7.2 Hz, 4H), 6.86 (t, *J* = 7.3 Hz, 1H), 6.79 (d, *J* = 7.7 Hz, 1H), 6.15 (brs, 1H), 6.07 (brs, 1H), 5.56 (d,

$J = 9.5$  Hz, 1H), 5.18 (d,  $J = 12.2$  Hz, 1H), 5.09 (d,  $J = 12.2$  Hz, 1H), 4.89 (d,  $J = 15.4$  Hz, 1H), 4.43 – 4.36 (m, 1H), 4.35 – 4.29 (m, 1H), 4.26 (d,  $J = 15.6$  Hz, 1H), 4.10 (d,  $J = 7.1$  Hz, 1H), 1.84 – 1.68 (m, 4H), 1.54 – 1.46 (m, 1H), 1.42 (s, 9H), 0.81 (d,  $J = 6.3$  Hz, 3H), 0.76 (d,  $J = 6.3$  Hz, 3H);  $^{13}\text{C}$  NMR (101 MHz,  $\text{CDCl}_3$ )  $\delta$  171.42, 169.00, 156.76, 147.98, 135.53, 129.15 (2C), 129.08 (2C), 128.61 (2C), 128.46 (2C), 128.16 (4C), 120.99, 113.61, 80.02, 68.47, 60.39, 58.75, 52.24, 50.77, 47.51, 41.29, 39.96, 34.66, 28.32 (3C), 25.27, 24.49, 22.87, 22.64, 21.40, 20.69, 14.09.; HRMS (ESI+)  $m/z$  calcd for  $\text{C}_{37}\text{H}_{49}\text{N}_5\text{O}_7\text{Na}$  [ $\text{M} + \text{Na}$ ] 698.3530, found 698.3544.

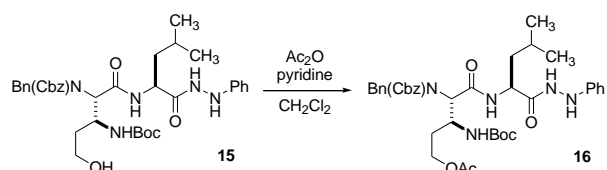

To a stirred solution of **15** (5.01 g, 7.41 mmol) in  $\text{CH}_2\text{Cl}_2$  (15 mL) were added pyridine (3.0 mL, 37.0 mmol) and acetic anhydride (3.5 mL, 37.0 mmol). The reaction mixture was stirred for 3 h at rt, and all volatiles were evaporated in vacuo. Purification by silica gel column chromatography (hexanes/EtOAc 60:40 to 50:50) gave **16** (3.66 g, 5.10 mmol, 69%) as a brown foam: TLC (hexanes/EtOAc 50:50)  $R_f = 0.50$ ;  $[\alpha]_{\text{D}}^{22} +0.095$  ( $c = 0.81$ ,  $\text{CHCl}_3$ ); IR (thin film)  $\nu_{\text{max}} = 3297$  (br), 2959, 1693, 1603, 1497, 1454, 1366, 1246, 1168, 1046, 753, 733, 695  $\text{cm}^{-1}$ ;  $^1\text{H}$  NMR (400 MHz,  $\text{CDCl}_3$ )  $\delta$  8.51 (brs, 1H), 7.38 – 7.31 (m, 9H), 7.31 – 7.27 (m, 2H), 7.23 – 7.17 (m, 4H), 6.87 (t,  $J = 7.4$  Hz, 1H), 6.79 (d,  $J = 8.0$  Hz, 1H), 6.01 (brs, 1H), 5.80 (brs, 1H), 5.17 – 5.10 (m, 2H), 5.05 – 4.98 (m, 2H), 4.24 (d,  $J = 15.4$  Hz, 1H), 4.14 – 4.10 (m, 2H), 4.06 (d,  $J = 7.1$  Hz, 1H), 2.04 (s, 3H), 1.74 – 1.62 (m, 4H), 1.42 (s, 9H), 1.11 – 1.06 (m, 1H), 0.80 (d,  $J = 6.2$  Hz, 3H), 0.75 (d,  $J = 6.1$  Hz, 3H);  $^{13}\text{C}$  NMR (101 MHz,  $\text{CDCl}_3$ )  $\delta$  171.27, 171.13, 168.90, 155.62, 148.06, 135.64, 129.25 (2C), 129.08 (2C), 128.64 (2C), 128.48 (2C), 128.28 (2C), 128.15 (2C), 121.00, 113.61, 79.75, 68.44, 63.17, 61.63, 60.41, 51.80, 50.66, 48.33, 41.30, 39.75, 30.01, 28.33 (3C), 24.48, 22.86, 21.30, 20.99; HRMS (ESI+)  $m/z$  calcd for  $\text{C}_{39}\text{H}_{51}\text{N}_5\text{O}_8\text{Na}$  [ $\text{M} + \text{Na}$ ] 740.3635, found 740.3566.

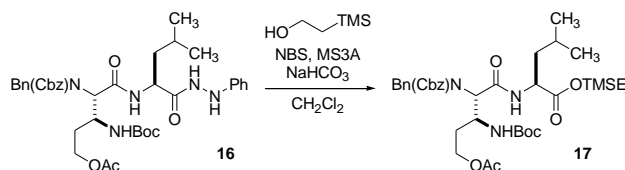

To a stirred suspension of **16** (3.42 g, 4.76 mmol), MS3A (6.84 g),  $\text{NaHCO}_3$  (2.00 g, 23.8 mmol) and 2-(trimethylsilyl)ethanol (2.05 mL, 14.3 mmol) was added NBS (2.54 g, 14.3 mmol) at rt. The reaction mixture was stirred for 1 h, diluted with  $\text{CH}_2\text{Cl}_2$ , filtered through Celite. The combined organic phase was washed with 1M HCl (aq), saturated  $\text{NaHCO}_3$  (aq) and brine and dried over  $\text{Na}_2\text{SO}_4$ , and concentrated in vacuo. The crude mixture was purified by silica gel column chromatography to give **17** as white foam (2.75 g, 3.78 mmol, 79%): TLC (hexanes/EtOAc 67:33)  $R_f = 0.40$ ;  $[\alpha]_{\text{D}}^{20} +0.140$  ( $c = 1.11$ ,  $\text{CHCl}_3$ ); IR (thin film)  $\nu_{\text{max}} = 3339$  (br), 2957, 1740, 1718, 1675, 1522, 1453, 1366, 1249, 1174, 1045, 861, 838, 696  $\text{cm}^{-1}$ ;  $^1\text{H}$  NMR (400 MHz, Chloroform- $d$ )  $\delta$  7.48 – 7.35 (m, 2H), 7.35 – 7.27 (m, 4H), 7.22 (brs, 4H), 5.18 (brs, 2H), 4.66 – 4.59 (m, 1H), 4.53 (d,  $J = 30.7$  Hz, 1H), 4.46 – 4.38 (m, 1H), 4.36 – 4.23 (m, 3H), 4.19 – 4.02 (m, 5H), 2.03 (s, 3H), 1.69 (brs, 4H), 1.57 – 1.46 (m, 1H),

1.39 (s, 9H), 1.00 – 0.92 (m, 3H), 0.85 – 0.76 (m, 3H), 0.04 (s, 9H);  $^{13}\text{C}$  NMR (101 MHz,  $\text{CDCl}_3$ )  $\delta$  172.32, 171.01, 168.25, 155.44, 135.94, 128.87 (2C), 128.49 (2C), 128.13 (2C), 127.84 (2C), 79.47, 68.06, 63.94, 63.55, 61.34, 50.79, 41.35, 30.76, 28.31 (3C), 24.77, 22.73, 21.91, 20.94, 17.35, -1.54 (3C); HRMS (ESI+)  $m/z$  calcd for  $\text{C}_{38}\text{H}_{57}\text{N}_3\text{O}_9\text{NaSi}$  [ $\text{M} + \text{Na}$ ] 750.3762, found 750.3814.

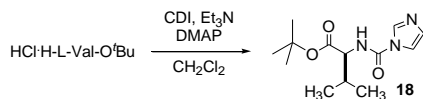

To a stirred suspension of the  $\text{HCl}\cdot\text{H-L-Val-O}^t\text{Bu}$  (1.50 g, 7.15 mmol) in  $\text{CH}_2\text{Cl}_2$  (21 mL) were added  $\text{Et}_3\text{N}$  (2.19 mL, 15.7 mmol) and DMAP (87.4 mg, 0.72 mmol), and  $N,N$ -carbonyldiimidazole (1.28 g, 7.87 mmol) was added at  $0\text{ }^\circ\text{C}$ . The reaction mixture was warmed to rt and stirred for 2 h. The reaction mixture was diluted with  $\text{CH}_2\text{Cl}_2$ , and the combined organic phase was washed with  $\text{H}_2\text{O}$  and brine and dried over  $\text{Na}_2\text{SO}_4$ . The crude material was purified by basic alumina column chromatography to give **18** as colorless oil (1.66 g, 6.22 mmol, 87%): TLC ( $\text{CHCl}_3/\text{MeOH}$  90:10)  $R_f = 0.25$ ;  $^1\text{H}$  NMR (500 MHz,  $\text{CDCl}_3$ )  $\delta$  8.19 (s, 1H), 7.43 (s, 1H), 6.75 (d,  $J = 8.0$  Hz, 1H), 4.59 (m, 1H), 3.81 (s, 3H), 2.28 (m, 1H), 1.01 (m, 6H);  $^{13}\text{C}$  NMR (125 MHz,  $\text{CDCl}_3$ )  $\delta$  172.1, 148.9, 136.1, 130.7, 115.9, 58.8, 52.6, 31.4, 18.9, 17.9; HRMS (ESI+)  $m/z$  calcd for  $\text{C}_{13}\text{H}_{22}\text{N}_3\text{O}_3$  [ $\text{M} + \text{H}$ ] 268.1661, found 268.1658.

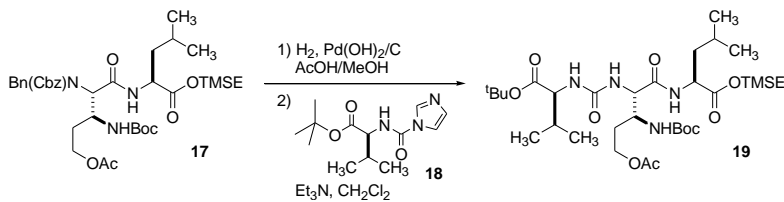

To a stirred solution of **17** (1.73 g, 2.38 mmol) in  $\text{MeOH}$  (100 mL) were added  $\text{AcOH}$  (0.2 mL) and  $\text{Pd}(\text{OH})_2/\text{C}$  (20 wt % 0.17 g) under  $\text{N}_2$ .  $\text{H}_2$  gas was introduced via a double-folded balloon, and the reaction mixture was stirred for 21 h under  $\text{H}_2$ . Upon completion, the solution was filtered through Celite and concentrated in vacuo to yield the desired primary amine. To a stirred solution of the primary amine and **18** (1.27 g, 4.76 mmol) in  $\text{CH}_2\text{Cl}_2$  (2.4 mL) was added  $\text{Et}_3\text{N}$  (0.33 mL, 2.38 mmol) at rt. After 12 h, the reaction mixture was diluted with  $\text{EtOAc}$ , washed with  $\text{NaHCO}_3$  (aq) and brine, and dried over  $\text{Na}_2\text{SO}_4$ . The crude material was purified by silica gel column chromatography to give **19** as white foam (1.14 g, 1.62 mmol, 68% for 2 steps): TLC (hexanes/ $\text{EtOAc}$  33:67)  $R_f = 0.30$ ;  $[\alpha]_D^{22} -0.055$  ( $c = 0.37$ ,  $\text{CHCl}_3$ ); IR (thin film)  $\nu_{\text{max}} = 3300$  (br), 2959, 2933, 2873, 1740, 1688, 1634, 1553, 1527, 1367, 1248, 1162, 1046, 861, 838  $\text{cm}^{-1}$ ;  $^1\text{H}$  NMR (500 MHz,  $\text{CDCl}_3$ )  $\delta$  6.82 (d,  $J = 8.1$  Hz, 1H), 6.21 (s, 1H), 5.06 (d,  $J = 8.7$  Hz, 1H), 4.99 (d,  $J = 8.4$  Hz, 1H), 4.52 (dd,  $J = 7.8$ , 5.2 Hz, 2H), 4.29 (ddd,  $J = 22.3$ , 9.9, 4.9 Hz, 2H), 4.19 (td,  $J = 8.0$ , 2.8 Hz, 2H), 4.08 (dt,  $J = 11.9$ , 6.3 Hz, 1H), 3.95 (quin,  $J = 7.6$  Hz, 1H), 2.17 – 2.08 (m, 1H), 2.06 (s, 3H), 1.97 – 1.88 (m, 2H), 1.65 – 1.52 (m, 3H), 1.46 (s, 9H), 1.41 (s, 9H), 1.01 (dd,  $J = 9.4$ , 8.1 Hz, 2H), 0.95 (d,  $J = 6.9$  Hz, 3H), 0.93 – 0.89 (m, 9H), 0.04 (s, 9H);  $^{13}\text{C}$  NMR (101 MHz,  $\text{CDCl}_3$ )  $\delta$  172.56, 171.72, 171.37, 170.36, 157.67, 81.78, 79.97, 63.60, 61.46, 58.57, 51.04, 41.37, 31.57, 28.30 (3C), 28.08

(3C), 24.79, 22.79, 21.94, 21.01, 18.93, 17.65, 17.39, -1.52 (3C); HRMS (ESI+)  $m/z$  calcd for  $C_{33}H_{62}N_4O_{10}NaSi$  [ $M + Na$ ] 725.4133, found 725.4094.

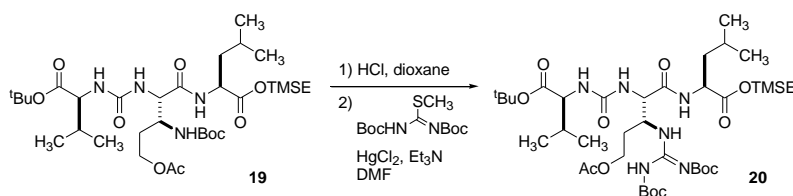

To a stirred solution of **19** (1.13 g, 1.61 mmol) was added a 4 M solution of HCl in dioxane (2.0 mL). The reaction mixture was stirred for 1 h at rt, and all volatiles were evaporated in vacuo to provide the free amine as an oil: TLC ( $CHCl_3/MeOH$  90:10)  $R_f = 0.40$ . To a stirred solution of the free amine in DMF (3.2 mL) were added *N,N'*-bis(*tert*-butoxycarbonyl)-*S*-methylisothiourea (0.70 g, 2.42 mmol),  $Et_3N$  (1.12 mL, 8.06 mmol), and  $HgCl_2$  (0.66 g, 2.42 mmol). The reaction mixture was stirred at 0 °C for 1.5 h. Upon completion, the reaction mixture was diluted with EtOAc and filtered through Celite. The combined organic phase was washed with brine, dried over  $Na_2SO_4$ , and concentrated in vacuo. The crude material was purified by silica gel column chromatography (hexanes/EtOAc 80:20 to 67:33) to give **20** (0.66 g, 0.78 mmol, 49% for 2 steps): TLC (hexanes/EtOAc 67:33)  $R_f = 0.30$ ;  $[\alpha]_D^{22} -0.049$  ( $c = 0.39$ ,  $CHCl_3$ ); IR (thin film)  $\nu_{max} = 3282$  (br), 2965, 1793, 1723, 1638, 1614, 1541, 1485, 1368, 1326, 1251, 1154, 1136, 1057, 1029, 860, 839, 810,  $778\text{ cm}^{-1}$ ;  $^1H$  NMR (400 MHz,  $CDCl_3$ )  $\delta$  11.36 (s, 1H), 8.65 (d,  $J = 7.8$  Hz, 1H), 7.93 (br s, 1H), 6.89 (d,  $J = 8.3$  Hz, 1H), 5.03 (d,  $J = 8.9$  Hz, 1H), 4.60 (dd,  $J = 7.4, 5.9$  Hz, 1H), 4.54 – 4.47 (m, 1H), 4.44 – 4.36 (m, 1H), 4.33 (dd,  $J = 8.8, 4.7$  Hz, 1H), 4.23 – 4.06 (m, 5H), 2.25 – 1.94 (m, 5H), 2.06 (s, 3H), 1.65 – 1.54 (m, 4H), 1.52 (s, 9H), 1.48 (s, 9H), 1.46 (s, 9H), 1.01 – 0.96 (m, 2H), 0.94 (d,  $J = 6.9$  Hz, 3H), 0.92 – 0.87 (m, 9H), 0.04 (s, 9H);  $^{13}C$  NMR (101 MHz,  $CDCl_3$ )  $\delta$  172.40, 171.81, 171.20, 170.34, 162.42, 157.90, 152.62, 83.43, 81.50, 79.76, 63.38, 61.24, 58.29, 57.71, 50.89, 41.14, 36.64, 31.67, 28.33 (3C), 28.06 (3C), 28.05 (3C), 24.79, 22.88, 21.82, 20.92, 19.05, 17.72, 17.31, -1.52 (3C); HRMS (ESI+)  $m/z$  calcd for  $C_{39}H_{73}N_6O_{12}Si$  [ $M + H$ ] 845.5056, found 845.4957.

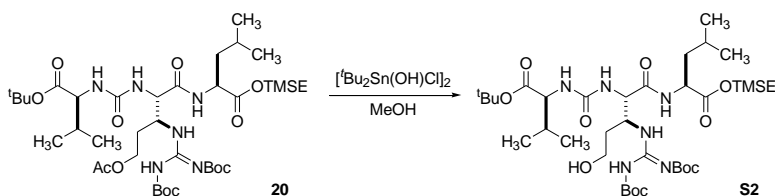

To a stirred solution of **20** (0.54 g, 0.64 mmol) in MeOH (1.3 mL) was added  $[Bu_2Sn(OH)Cl]_2$  (0.18 g, 0.32 mmol). After 5 h at rt, all volatiles were evaporated in vacuo. The crude product was passed through a silica gel pad (hexanes/EtOAc 50:50) to provide the free alcohol **S2** (0.47 g, 0.58 mmol, 91%) as a white foam: TLC (hexanes/EtOAc 60:40)  $R_f = 0.30$ ;  $[\alpha]_D^{22} -0.082$  ( $c = 0.67$ ,  $CHCl_3$ ); IR (thin film)  $\nu_{max} = 3318$  (br), 2961, 2873, 1730, 1648, 1611, 1543, 1412, 1392, 1368, 1307, 1251, 1227, 1155, 1132, 1058, 857,  $839\text{ cm}^{-1}$ ;  $^1H$  NMR (400 MHz,  $CDCl_3$ )  $\delta$  11.37 (s, 1H), 8.90 (d,  $J = 8.4$  Hz, 1H), 6.63 (d,  $J = 8.5$  Hz, 1H), 6.10 (d,  $J = 6.2$  Hz, 1H), 5.18 (d,  $J = 8.8$  Hz, 1H), 4.61 (td,  $J = 8.7, 7.7, 3.5$  Hz, 2H),

4.53 (ddd,  $J = 11.3, 8.0, 3.9$  Hz, 1H), 4.26 (dd,  $J = 8.7, 4.5$  Hz, 1H), 4.22 – 4.15 (m, 2H), 3.69 (dq,  $J = 10.6, 3.0$  Hz, 1H), 3.54 (td,  $J = 11.7, 2.6$  Hz, 1H), 2.18 – 2.08 (m, 1H), 1.97 – 1.78 (m, 3H), 1.70 – 1.54 (m, 2H), 1.50 (s, 9H), 1.46 (s, 18H), 1.02 – 0.98 (m, 2H), 0.96 (d,  $J = 7.0$  Hz, 3H), 0.92 – 0.87 (m, 9H), 0.04 (s, 9H);  $^{13}\text{C}$  NMR (101 MHz,  $\text{CDCl}_3$ )  $\delta$  172.78, 171.78, 170.35, 162.59, 157.40, 156.52, 152.58, 83.49, 81.71, 79.53, 63.81, 58.63, 57.94, 56.37, 51.05, 50.84, 41.27, 34.77, 31.46, 28.21 (3C), 28.09 (3C), 28.07 (3C), 24.76, 22.99, 21.54, 18.94, 17.70, 17.38, -1.52 (3C); HRMS (ESI+)  $m/z$  calcd for  $\text{C}_{37}\text{H}_{71}\text{N}_6\text{O}_{11}\text{Si}$  [ $\text{M} + \text{H}$ ] 803.4950, found 803.5033.

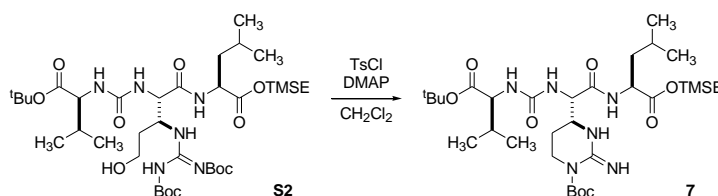

The alcohol **S2** (49.2 mg, 0.061 mmol) was dissolved in  $\text{CH}_2\text{Cl}_2$  (0.6 mL), and TsCl (58.4 mg, 0.31 mmol) and DMAP (74.8 mg, 0.61 mmol) were added at 0 °C. The reaction mixture was warmed to rt and stirred for 1 h. Upon completion, the reaction mixture was quenched with 1N HCl (aq), extracted with EtOAc. The combined organic extracts were washed with saturated  $\text{NaHCO}_3$  (aq), dried with  $\text{Na}_2\text{SO}_4$ , concentrated in vacuo. The crude product was purified by silica gel column chromatography (hexanes/EtOAc 60:40 to 50:50) to yield **7** (29.0 mg, 0.037 mmol, 60%) as a colorless oil: TLC (hexanes/EtOAc 50:50)  $R_f = 0.30$ ;  $[\alpha]_D^{22} -0.115$  ( $c = 0.75, \text{CHCl}_3$ ); IR (thin film)  $\nu_{\text{max}} = 3283$  (br), 2960, 2933, 2873, 1733, 1639, 1542, 1367, 1337, 1250, 1148, 1056, 985, 936, 857, 838, 771  $\text{cm}^{-1}$ ;  $^1\text{H}$  NMR (500 MHz,  $\text{CDCl}_3$ )  $\delta$  9.79 (brs, 1H), 8.15 (brs, 1H), 6.14 (brs, 1H), 5.11 (d,  $J = 7.5$  Hz, 1H), 4.65 – 4.50 (m, 1H), 4.50 – 4.43 (m, 2H), 4.26 (dd,  $J = 8.5, 4.2$  Hz, 1H), 4.19 – 4.15 (m, 2H), 4.06 (dt,  $J = 11.5, 3.5$  Hz, 1H), 3.87 (dd,  $J = 12.4, 3.5$  Hz, 1H), 3.33 (td,  $J = 12.8, 4.2$  Hz, 1H), 2.17 – 2.07 (m, 1H), 2.07 – 2.00 (m, 1H), 1.71 (t,  $J = 9.1$  Hz, 1H), 1.65 – 1.59 (m, 2H), 1.51 (s, 9H), 1.47 (s, 9H), 1.45 (s, 9H), 1.02 – 0.98 (m, 2H), 0.93 (d,  $J = 6.9$  Hz, 3H), 0.91 – 0.87 (m, 9H), 0.02 (s, 9H);  $^{13}\text{C}$  NMR (101 MHz,  $\text{CDCl}_3$ )  $\delta$  172.58, 171.66, 157.50, 153.20, 83.89, 81.38, 81.00, 63.21, 58.38, 57.95, 57.21, 54.17, 51.28, 50.83, 44.30, 40.19, 31.54, 28.27 (3C), 28.20, 28.08 (6C), 24.82, 23.02, 21.51, 18.92, 17.66, 17.32, -1.52 (3C); HRMS (ESI+)  $m/z$  calcd for  $\text{C}_{37}\text{H}_{69}\text{N}_6\text{O}_{10}\text{Si}$  [ $\text{M} + \text{H}$ ] 785.4844, found 785.4847.

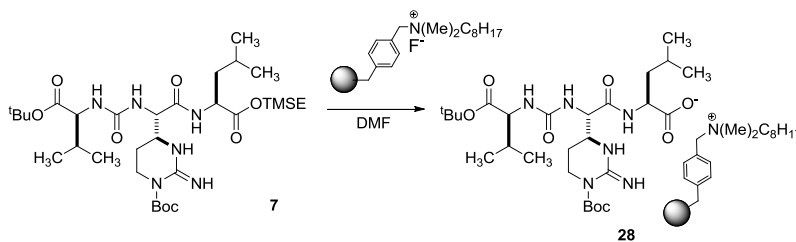

To a stirred solution of **7** (50.0 mg, 0.064 mmol) in DMF (0.6 mL) was added PS-F (1.1 mmol/g, 0.29 g, 0.32 mmol). After 2 h at 55 °C, the reaction was cooled to rt, TFA/DMF (1%, 0.6 mL) was added. The reaction mixture was stirred for 1.5 h and filtered. The filtered PS-F was washed with a solution of DMF/MeOH (10%, 1.8 mL) and combined organic solution was evaporated in vacuo. This was used in the following reactions.

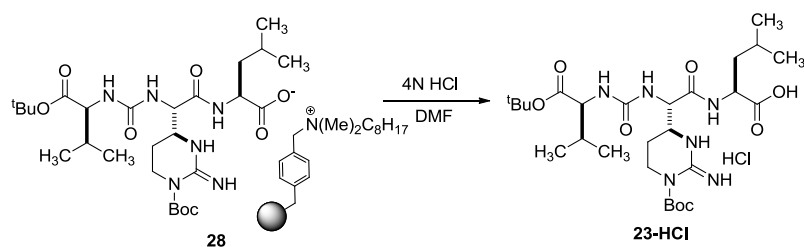

The complex **28** was treated with 4N HC (in dioxane). The polymers were filtered off via a glass filter, and all volatiles were evaporated in vacuo to furnish **23-HCl** in quantitative yield:  $[\alpha]_D^{20} +0.108$  ( $c = 0.95$ , MeOH); IR (thin film)  $\nu_{\max} = 3282$  (br), 3069 (br), 2964, 2874, 1665, 1552, 1469, 1369, 1314, 1252, 1201, 1179, 1137, 837, 800, 721  $\text{cm}^{-1}$ ;  $^1\text{H}$  NMR (500 MHz,  $\text{CD}_3\text{OD}$ )  $\delta$  4.55 (d,  $J = 5.5$  Hz, 1H), 4.44 (q,  $J = 7.2$  Hz, 1H), 4.08 (d,  $J = 4.9$  Hz, 1H), 3.90 (dt,  $J = 9.6, 5.1$  Hz, 1H), 3.54 (dt,  $J = 13.4, 5.0$  Hz, 1H), 3.45 (dt,  $J = 8.4, 4.3$  Hz, 1H), 2.12 (tt,  $J = 13.5, 5.3$  Hz, 2H), 1.87 (dtd,  $J = 13.9, 9.0, 5.0$  Hz, 1H), 1.70 – 1.66 (m, 3H), 1.54 (s, 9H), 1.47 (s, 9H), 0.99 – 0.92 (m, 12H);  $^{13}\text{C}$  NMR (101 MHz,  $\text{CD}_3\text{OD}$ )  $\delta$  173.37, 171.98, 160.08, 156.15, 82.83, 69.13, 60.35, 57.19, 52.64, 41.45, 40.20, 37.97, 31.63, 30.14, 28.77, 28.46, 28.36 (3C), 28.11 (3C), 26.13, 24.97, 24.02, 23.41, 21.81, 19.57, 18.03, 14.37, 11.40; HRMS (ESI+)  $m/z$  calcd for  $\text{C}_{27}\text{H}_{49}\text{N}_6\text{O}_8$   $[M + H]$  585.3612, found 585.3630.

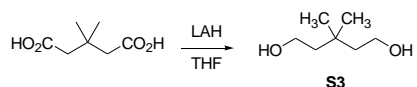

To a stirred suspension of  $\text{LiAlH}_4$  (11 g, 295 mmol) in dry THF (200 mL) was added a solution of 3,3-dimethylglutaric acid (23.5 g, 147 mmol) in dry THF (100 mL) dropwise at  $0^\circ\text{C}$  under  $\text{N}_2$  atmosphere, and the reaction mixture was warmed to rt. After 4h, the reaction was stirred at reflux for 4h and cooled to  $0^\circ\text{C}$ . The reaction was quenched by  $\text{NaOH}$  (aq). Extraction with EtOAc was conducted. The combined EtOAc phase was dried over anhydrous  $\text{Na}_2\text{SO}_4$  and evaporated under reduced pressure. The residue was purified by distillation to obtain pure **S3** (16.4 g, 124 mmol, 84 %): TLC (hexanes/EtOAc 20:80)  $R_f = 0.20$ ; IR (thin film)  $\nu_{\max} = 3317$  (br), 2955, 2934, 1676, 1469, 1366, 1030, 1006, 990  $\text{cm}^{-1}$ ;  $^1\text{H}$  NMR (400 MHz,  $\text{CDCl}_3$ )  $\delta$  3.73 (t,  $J = 7.0$  Hz, 4H), 2.04 (brs, 2H), 1.57 (t,  $J = 7.0$  Hz, 4H), 0.94 (s, 6H);  $^{13}\text{C}$  NMR (101 MHz,  $\text{CDCl}_3$ )  $\delta$  59.60 (2C), 44.06 (2C), 31.67, 28.08 (2C); HRMS (ESI+)  $m/z$  calcd for  $\text{C}_7\text{H}_{16}\text{O}_2$  132.1150, found 132.1144.

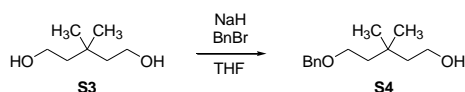

To a stirred suspension of  $\text{NaH}$  (2.27 g, 56.7 mmol) in dry THF (56.7 mL) was added **S3** (7.50 g, 56.7 mmol) at rt. After being stirred for 1 h,  $\text{BnBr}$  (6.75 mL, 56.7 mmol) was added to the reaction solution dropwisely at  $0^\circ\text{C}$ . The reaction mixture was warmed to rt and stirred for 18 h. The reaction was quenched with saturated  $\text{NH}_4\text{Cl}$  (aq.) at  $0^\circ\text{C}$  and extracted with EtOAc. The combined organic extracts were dried over  $\text{Na}_2\text{SO}_4$  and concentrated in vacuo. The crude mixture was purified by silica gel column chromatography (hexanes/EtOAc 80:20 to 50:50) to obtain **S4** (7.90 g, 35.5 mmol, 63%)



as a colorless oil: TLC (hexanes/EtOAc 80:20)  $R_f = 0.20$ ; IR (thin film)  $\nu_{\max} = 3357$  (br), 2955, 2930, 2869, 1719, 1469, 1453, 1365, 1274, 1203, 1098, 1070, 1045, 1027, 735, 696  $\text{cm}^{-1}$ ;  $^1\text{H NMR}$  (400 MHz,  $\text{CDCl}_3$ )  $\delta$  7.40 – 7.27 (m, 5H), 4.50 (s, 2H), 3.70 (t,  $J = 7.2$  Hz, 2H), 3.55 (t,  $J = 6.9$  Hz, 2H), 1.62 (t,  $J = 6.9$  Hz, 2H), 1.56 (t,  $J = 7.2$  Hz, 2H), 0.93 (s, 6H);  $^{13}\text{C NMR}$  (101 MHz,  $\text{CDCl}_3$ )  $\delta$  138.29, 128.39 (2C), 127.66 (2C), 127.58, 73.12, 67.32, 59.72, 44.36, 41.10, 31.67, 28.03 (2C); HRMS (ESI+)  $m/z$  calcd for  $\text{C}_{14}\text{H}_{22}\text{O}_2$  222.1620, found 222.1622.

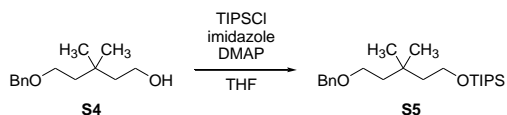

To a stirred solution of **S4** (7.90 g, 35.5 mmol) and imidazole (3.38 g, 49.7 mmol) in dry THF (125 mL) were added TIPSCl (11.4 mL, 53.3 mmol) and DMAP (0.43 g, 3.55 mmol) at 0 °C. The reaction mixture was warmed to rt and stirred for 16 h. The reaction was quenched with saturated  $\text{NaHCO}_3$  (aq.) and extracted with EtOAc. The combined organic extracts were dried over  $\text{Na}_2\text{SO}_4$  and concentrated in vacuo. The crude mixture was purified by silica gel column chromatography (hexanes/EtOAc 97:3 to 80:20) to obtain **S5** (12.4 g, 32.7 mmol, 92%) as a colorless oil: TLC (hexanes)  $R_f = 0.20$ ; IR (thin film)  $\nu_{\max} = 2941, 2891, 2865, 1742, 1463, 1384, 1365, 1245, 1096, 1069, 1028, 1012, 996, 881, 732, 679$   $\text{cm}^{-1}$ ;  $^1\text{H NMR}$  (400 MHz,  $\text{CDCl}_3$ )  $\delta$  7.38 – 7.26 (m, 5H), 4.49 (s, 2H), 3.73 (dd,  $J = 7.9, 7.1$  Hz, 2H), 3.54 (dd,  $J = 7.9, 7.1$  Hz, 2H), 1.63 – 1.57 (m, 2H), 1.53 (dd,  $J = 8.0, 7.1$  Hz, 2H), 1.13 – 1.00 (m, 21H), 0.93 (s, 6H);  $^{13}\text{C NMR}$  (101 MHz,  $\text{CDCl}_3$ )  $\delta$  138.60, 128.33 (2C), 127.58 (2C), 127.45, 73.01, 67.46, 60.14, 44.83, 41.44, 31.44, 27.80 (2C), 18.05 (6C), 11.96 (3C); HRMS (ESI+)  $m/z$  calcd for  $\text{C}_{23}\text{H}_{43}\text{O}_2\text{Si}$  [M + H] 379.3032, found 379.3062.

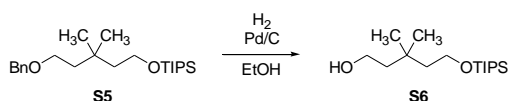

To a stirred solution of **S5** (12.4 g, 32.7 mmol) in EtOH (100 mL) was added Pd/C (10 wt % 200 mg).  $\text{H}_2$  gas was introduced and the reaction mixture was stirred for 18 h under  $\text{H}_2$ . The solution was filtered through Celite and concentrated in vacuo. The crude mixture was purified by silica gel column chromatography (hexanes/EtOAc 95:5 to 80:20) to obtain **S6** (8.02 g, 27.8 mmol, 85%) as a colorless oil: TLC (hexanes/EtOAc 80:20)  $R_f = 0.40$ ; IR (thin film)  $\nu_{\max} = 3343$  (br), 2941, 2891, 2866, 1463, 1384, 1366, 1096, 1065, 1012, 995, 881, 745, 678, 656  $\text{cm}^{-1}$ ;  $^1\text{H NMR}$  (400 MHz,  $\text{CDCl}_3$ )  $\delta$  3.76 (t,  $J = 6.9$  Hz, 2H), 3.72 (t,  $J = 7.2$  Hz, 2H), 1.57 (td,  $J = 7.1, 2.8$  Hz, 4H), 1.12 – 1.03 (m, 21H), 0.94 (s, 6H);  $^{13}\text{C NMR}$  (101 MHz,  $\text{CDCl}_3$ )  $\delta$  60.30, 59.85, 44.31, 31.67, 28.14 (2C), 18.05 (6C), 11.95 (3C); HRMS (ESI+)  $m/z$  calcd for  $\text{C}_{16}\text{H}_{36}\text{O}_2\text{Si}$  288.2485, found 288.2473.

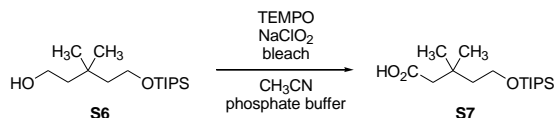

To a stirred solution of **S6** (8.02 g, 27.8 mmol) and TEMPO (0.22 g, 1.39 mmol) in MeCN (56 mL) an phosphate buffer (pH=6.8, 56 mL) were added NaClO<sub>2</sub> (3.02 g, 33.4 mmol) and bleach (8.25%, 14 mL) at 35 °C. After being stirred for 4 h, the reaction mixture was extracted with EtOAc and combined organic phase was dried over Na<sub>2</sub>SO<sub>4</sub> and concentrated in vacuo. The crude mixture was purified by silica gel column chromatography (hexanes/EtOAc 95:5 to 80:20) to give **S7** (8.13 g, 26.9 mmol, 97%) as an orange oil: TLC (hexanes/EtOAc 50:50) *R<sub>f</sub>* = 0.50; IR (thin film)  $\nu_{\max}$  = 2942, 2892, 2866, 1705, 1463, 1246, 1097, 1052, 996, 881, 738, 678, 656 cm<sup>-1</sup>; <sup>1</sup>H NMR (400 MHz, CDCl<sub>3</sub>)  $\delta$  3.88 (t, *J* = 5.8 Hz, 2H), 2.38 (s, 2H), 1.71 (t, *J* = 5.8 Hz, 2H), 1.20 – 1.11 (m, 3H), 1.09 (s, 12H), 1.08 (s, 6H), 1.07 (s, 6H); <sup>13</sup>C NMR (101 MHz, CDCl<sub>3</sub>)  $\delta$  173.89, 60.72, 46.82, 42.60, 32.40, 28.52 (2C), 17.91 (6C), 11.79 (3C); HRMS (ESI+) *m/z* calcd for C<sub>16</sub>H<sub>34</sub>O<sub>3</sub>NaSi [M + Na] 325.2175, found 325.2171.

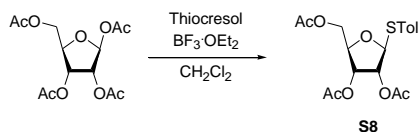

To a stirred solution of  $\beta$ -D-Ribofuranose 1,2,3,5-tetraacetate (25.3 g, 79.5 mmol) and thiocresol (10.9 g, 87.5 mmol) in CH<sub>2</sub>Cl<sub>2</sub> (240 mL) was added BF<sub>3</sub>·OEt<sub>2</sub> (30.2 mL, 238.6 mmol) dropwise at -78 °C. The reaction mixture was warmed to 0 °C and stirred for 30 min. The reaction was quenched with saturated NaHCO<sub>3</sub> (aq.) and extracted with CH<sub>2</sub>Cl<sub>2</sub>. The combined organic extracts were dried over Na<sub>2</sub>SO<sub>4</sub> and concentrated in vacuo. The crude mixture was purified by silica gel column chromatography (hexanes/EtOAc 90:10 to 70:30) to get **S8** (29.3 g, 76.6 mmol, 96%): TLC (hexanes/EtOAc 50:50) *R<sub>f</sub>* = 0.60;  $[\alpha]_{\text{D}}^{20}$  -0.411 (*c* = 0.51, CHCl<sub>3</sub>); IR (thin film)  $\nu_{\max}$  = 1742, 1371, 1214, 1091, 1045, 1017, 899, 810 cm<sup>-1</sup>; <sup>1</sup>H NMR (400 MHz, CDCl<sub>3</sub>)  $\delta$  7.41 (d, *J* = 8.1 Hz, 2H), 7.14 (d, *J* = 7.7 Hz, 2H), 5.25 – 5.22 (m, 1H), 5.21 – 5.17 (m, 2H), 4.26 – 4.20 (m, 2H), 4.07 (dd, *J* = 12.9, 5.5 Hz, 1H), 2.34 (s, 3H), 2.09 (s, 3H), 2.06 (s, 3H), 2.04 (s, 3H); <sup>13</sup>C NMR (101 MHz, CDCl<sub>3</sub>)  $\delta$  170.50, 169.63, 169.42, 138.80, 134.18 (2C), 129.81 (2C), 127.45, 87.95, 79.97, 73.67, 71.41, 63.46, 21.15, 20.75, 20.53 (2C); HRMS (ESI+) *m/z* calcd for C<sub>18</sub>H<sub>22</sub>O<sub>7</sub>NaS [M + Na] 405.0984, found: 405.0970.

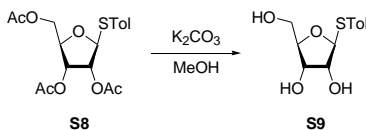

To a stirred solution of **S8** (24.7 g, 64.6 mmol) in MeOH (300 mL) was added K<sub>2</sub>CO<sub>3</sub> (44.5 g, 322 mmol). After being stirred for 30 min, the reaction mixture filtered and concentrated in vacuo. The crude mixture was purified by silica gel column chromatography (CHCl<sub>3</sub>/MeOH 75:25) to obtain **S9** (11.7 g, 45.6 mmol, 71%): TLC (EtOAc) *R<sub>f</sub>* = 0.50;  $[\alpha]_{\text{D}}^{20}$  -2.247 (*c* = 1.82, MeOH); IR (thin film)  $\nu_{\max}$  = 3353 (br), 2921, 1492, 1399, 1331, 1199, 1034, 1015, 940, 806, 703 cm<sup>-1</sup>; <sup>1</sup>H NMR (400 MHz, CDCl<sub>3</sub>)  $\delta$  7.38 (d, *J* = 8.1 Hz, 2H), 7.11 (d, *J* = 7.8 Hz, 2H), 5.21 (d, *J* = 4.6 Hz, 1H), 4.15 (t, *J* = 5.1 Hz, 1H), 4.06 (t, *J* =

4.9 Hz, 1H), 4.01 (q,  $J = 3.8$  Hz, 1H), 3.75 (dd,  $J = 12.2, 3.5$  Hz, 1H), 3.62 (dd,  $J = 12.2, 3.8$  Hz, 1H), 3.21 (s, 3H), 2.32 (s, 3H);  $^{13}\text{C}$  NMR (101 MHz,  $\text{CDCl}_3$ )  $\delta$  138.25, 132.73 (2C), 129.91 (2C), 128.78, 90.45, 84.81, 75.26, 71.42, 62.48, 21.11; HRMS (ESI+)  $m/z$  calcd for  $\text{C}_{12}\text{H}_{16}\text{O}_4\text{NaS}$  [ $\text{M} + \text{Na}$ ] 279.0667, found: 279.0670.

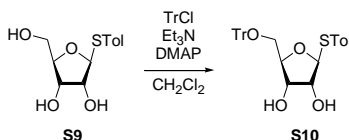

To a stirred solution of **S9** (11.7 g, 45.6 mmol) and trityl chloride (19.1 g, 68.5 mmol) in  $\text{CH}_2\text{Cl}_2$  (230 mL) were added  $\text{Et}_3\text{N}$  (12.7 mL, 91.3 mmol) and DMAP (1.12 g, 9.13 mmol) at  $0^\circ\text{C}$ , and the reaction mixture was warmed to rt. After being stirred for 16 h, the reaction was quenched with water and extracted with  $\text{CH}_2\text{Cl}_2$ . The combined organic solution was dried over  $\text{Na}_2\text{SO}_4$  and concentrated in vacuo. The crude mixture was purified by silica gel column chromatography (hexanes/ $\text{EtOAc}$  80:20 to 50:50) to get **S10** (17.3 g, 34.7 mmol, 76%): TLC (hexanes/ $\text{EtOAc}$  50:50)  $R_f = 0.50$ ;  $[\alpha]_D^{21} -1.029$  ( $c = 1.42$ ,  $\text{CHCl}_3$ ); IR (thin film)  $\nu_{\text{max}} = 3395$  (br), 3058, 3021, 2921, 2870, 1596, 1491, 1448, 1399, 1319, 1216, 1184, 1154, 1075, 1031, 1012, 1001, 950, 900, 808, 745, 698,  $666\text{ cm}^{-1}$ ;  $^1\text{H}$  NMR (400 MHz,  $\text{CDCl}_3$ )  $\delta$  7.46 (d,  $J = 7.3$  Hz, 6H), 7.41 (d,  $J = 7.9$  Hz, 2H), 7.32 – 7.21 (m, 9H), 7.07 (d,  $J = 7.8$  Hz, 2H), 5.22 (d,  $J = 4.9$  Hz, 1H), 4.16 (q,  $J = 4.7$  Hz, 1H), 4.08 (dq,  $J = 12.9, 4.7$  Hz, 2H), 3.26 (qd,  $J = 10.0, 4.4$  Hz, 2H), 2.59 (d,  $J = 4.7$  Hz, 1H), 2.41 (d,  $J = 4.0$  Hz, 1H), 2.31 (s, 3H);  $^{13}\text{C}$  NMR (101 MHz,  $\text{CDCl}_3$ )  $\delta$  143.73 (2C), 137.84, 132.83 (3C), 129.73 (2C), 129.43, 128.74 (6C), 127.86 (6C), 127.07 (3C), 90.49, 86.96, 83.40, 75.27, 72.48, 64.20, 21.11; HRMS (ESI+)  $m/z$  calcd for  $\text{C}_{31}\text{H}_{30}\text{O}_4\text{NaS}$  [ $\text{M} + \text{Na}$ ] 521.1762, found: 521.1721.

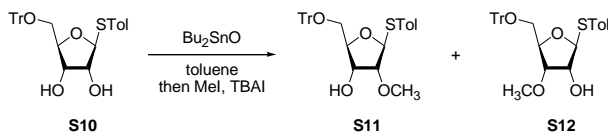

**S10** (12.4 g, 24.8 mmol) and Dibutyltin(IV) oxide (9.25 g, 37.2 mmol) were dissolved in toluene (250 mL). The reaction mixture was stirred at reflux for 3 h and water was removed by Dean-Stark trap. After the reaction was cooled to rt, MeI (3.08 mL, 49.5 mmol) and  $n\text{-Bu}_4\text{NI}$  were added. After being stirred for 16 h at reflux, the reaction was cooled to rt and concentrated under reduced pressure. The crude mixture was purified by silica gel column chromatography (hexanes/ $\text{EtOAc}$  80:20 to 67:33) to get **S11** and **S12** (9.03 g, 17.6 mmol, 71%) as diastereomeric mixture. Data for major diastereomer: TLC (hexanes/ $\text{EtOAc}$  67:33)  $R_f = 0.40$ ; IR (thin film)  $\nu_{\text{max}} = 3471$  (br), 3058, 3021, 2924, 1597, 1491, 1448, 1399, 1323, 1216, 1183, 1154, 1107, 1075, 1031, 1017, 982, 950, 899, 808, 745, 698,  $666\text{ cm}^{-1}$ ;  $^1\text{H}$  NMR (400 MHz,  $\text{CDCl}_3$ )  $\delta$  7.51 – 7.39 (m, 8H), 7.32 – 7.21 (m, 9H), 7.07 (d,  $J = 8.0$  Hz, 2H), 5.33 (d,  $J = 4.2$  Hz, 1H), 4.09 – 4.03 (m, 2H), 3.79 – 3.76 (m, 1H), 3.48 (s, 3H), 3.28 (dd,  $J = 10.2, 3.5$  Hz, 1H), 3.19 (q,  $J = 5.4$  Hz, 1H), 2.50 (d,  $J = 6.0$  Hz, 1H), 2.32 (s, 3H);  $^{13}\text{C}$  NMR (101 MHz,  $\text{CDCl}_3$ )  $\delta$  143.87 (2C), 137.78, 132.75 (3C), 129.73 (2C), 128.83 (6C), 127.78 (6C), 126.97 (3C), 90.75, 87.91, 86.77, 84.34, 80.87, 73.83, 71.08, 64.16, 58.41, 21.12; HRMS (ESI+)  $m/z$  calcd for  $\text{C}_{32}\text{H}_{32}\text{O}_4\text{NaS}$  [ $\text{M} + \text{Na}$ ] 535.1919, found: 535.1835. Data for minor

diastereomer: TLC (hexanes/EtOAc 67:33)  $R_f = 0.40$ ;  $^1\text{H}$  NMR (400 MHz,  $\text{CDCl}_3$ )  $\delta$  7.51 – 7.39 (m, 8H), 7.32 – 7.21 (m, 9H), 7.07 (d,  $J = 7.7$  Hz, 2H), 5.17 (d,  $J = 5.4$  Hz, 1H), 4.14 – 4.09 (m, 2H), 3.81 – 3.79 (m, 1H), 3.38 (s, 3H), 3.19 – 3.15 (m, 2H), 2.79 (d,  $J = 6.8$  Hz, 1H), 2.31 (s, 3H);  $^{13}\text{C}$  NMR (101 MHz,  $\text{CDCl}_3$ )  $\delta$  143.78 (2C), 137.60, 132.75 (3C), 129.64 (2C), 128.73 (6C), 127.82 (6C), 127.04 (3C), 90.75, 87.91, 86.83, 84.10, 81.32, 73.83, 71.08, 63.81, 58.02, 21.12.

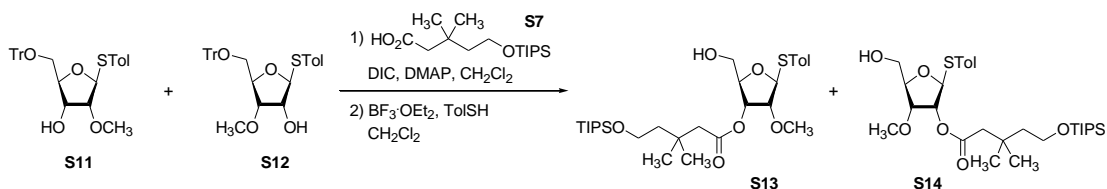

To a stirred solution of **S11** and **S12** (9.03 g, 17.6 mmol) and **S7** (6.39 g, 21.1 mmol) in  $\text{CH}_2\text{Cl}_2$  (50 mL) were added DMAP (3.23 g, 26.4 mmol) and DIC (3.31 mL, 21.1 mmol). The reaction mixture was stirred for 20 h at rt and concentrated in vacuo. The crude mixture was purified by silica gel column chromatography (hexanes/EtOAc 95:5 to 90:10) to afford desired ester (11.6 g, 14.5 mmol, 82%) as diastereomeric mixture. To a stirred solution of ester (11.6 g, 14.5 mmol) and thiocresol (3.60 g, 29.0 mmol) in  $\text{CH}_2\text{Cl}_2$  was added  $\text{BF}_3 \cdot \text{OEt}_2$  (0.73 mL, 5.80 mmol) at 0 °C. After being stirred for 1 h, the reaction was quenched with saturated  $\text{NaHCO}_3$  (aq.) and extracted with EtOAc. The combined organic solution was dried over  $\text{Na}_2\text{SO}_4$  and concentrated in vacuo. The crude mixture was purified by silica gel column chromatography (hexanes/EtOAc 93:7 to 80:20) to afford desired **S13** (3.23 g, 5.82 mmol, 40%) and undesired **S14** (3.36 g, 6.05 mmol, 42%). Data for desired **S13**: TLC (hexanes/EtOAc 80:20)  $R_f = 0.45$ ;  $[\alpha]_D^{21} -0.378$  ( $c = 0.82$ ,  $\text{CHCl}_3$ ); IR (thin film)  $\nu_{\text{max}} = 3475$  (br), 2940, 2865, 1735, 1493, 1462, 1389, 1367, 1223, 1189, 1093, 1051, 1017, 994, 882, 808, 743, 679, 657  $\text{cm}^{-1}$ ;  $^1\text{H}$  NMR (400 MHz,  $\text{CDCl}_3$ )  $\delta$  7.43 (d,  $J = 8.2$  Hz, 2H), 7.15 (d,  $J = 7.9$  Hz, 2H), 5.20 (d,  $J = 6.0$  Hz, 1H), 5.16 (dd,  $J = 5.3, 3.9$  Hz, 1H), 4.13 (q,  $J = 3.3$  Hz, 1H), 3.81 – 3.72 (m, 4H), 3.57 (dd,  $J = 12.4, 3.2$  Hz, 1H), 3.40 (s, 3H), 2.34 (s, 3H), 2.32 (s, 2H), 1.62 (dd,  $J = 7.5, 6.5$  Hz, 2H), 1.11 – 1.00 (m, 27H);  $^{13}\text{C}$  NMR (101 MHz,  $\text{CDCl}_3$ )  $\delta$  171.46, 138.51, 133.36 (2C), 129.87 (2C), 128.38, 88.22, 83.70, 82.51, 71.50, 62.29, 60.03, 58.81, 46.28, 44.47, 32.62, 27.48, 27.46, 21.15, 18.03 (6C), 11.89 (3C); HRMS (ESI+)  $m/z$  calcd for  $\text{C}_{29}\text{H}_{50}\text{O}_6\text{NaSSi}$  [ $\text{M} + \text{Na}$ ] 577.2995, found: 577.3037. Data for undesired **S14**: TLC (hexanes/EtOAc 80:20)  $R_f = 0.40$ ;  $[\alpha]_D^{22} -0.362$  ( $c = 0.58$ ,  $\text{CHCl}_3$ ); IR (thin film)  $\nu_{\text{max}} = 3473$  (br), 2940, 2865, 1736, 1493, 1463, 1389, 1367, 1220, 1191, 1098, 1052, 1017, 996, 939, 882, 809, 742, 680, 657  $\text{cm}^{-1}$ ;  $^1\text{H}$  NMR (400 MHz,  $\text{CDCl}_3$ )  $\delta$  7.38 (d,  $J = 8.2$  Hz, 2H), 7.14 (d,  $J = 8.0$  Hz, 2H), 5.35 (d,  $J = 2.5$  Hz, 1H), 5.32 (dd,  $J = 4.5, 2.5$  Hz, 1H), 4.05 (dt,  $J = 7.2, 2.9$  Hz, 1H), 3.98 (dd,  $J = 7.3, 4.6$  Hz, 1H), 3.82 (dd,  $J = 12.3, 2.8$  Hz, 1H), 3.77 (t,  $J = 7.0$  Hz, 2H), 3.60 (dd,  $J = 12.3, 3.2$  Hz, 1H), 3.36 (s, 3H), 2.35 (s, 2H), 2.33 (s, 3H), 1.64 (td,  $J = 6.9, 1.2$  Hz, 2H), 1.11 – 0.99 (m, 27H);  $^{13}\text{C}$  NMR (101 MHz,  $\text{CDCl}_3$ )  $\delta$  170.99, 138.37, 132.76 (2C), 129.96 (2C), 128.73, 89.49, 82.60, 78.47, 74.69, 61.45, 60.03, 58.78, 46.41, 44.49, 32.66, 27.48 (2C), 21.13, 18.03 (6C), 11.89 (3C); HRMS (ESI+)  $m/z$  calcd for  $\text{C}_{29}\text{H}_{50}\text{O}_6\text{NaSSi}$  [ $\text{M} + \text{Na}$ ] 577.2995, found: 577.2998.

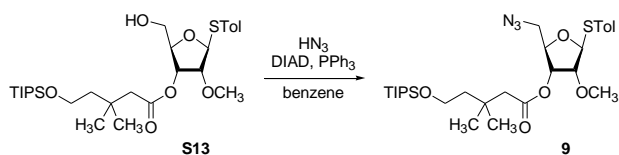

To a stirred solution of **S13** (2.50 g, 4.50 mmol) and  $\text{PPh}_3$  (2.36 g, 9.01 mmol) in dry benzene (15 mL) were added  $\text{HN}_3$  (0.6 M in benzene, 75 mL, 45.0 mmol) and DIAD (1.77 mL, 9.01 mmol). The reaction mixture was stirred for 12 h at rt and concentrated in vacuo. The crude mixture was purified by silica gel column chromatography (hexanes/EtOAc 95:5) to afford **9** (2.29 g, 4.11 mmol, 91%): TLC (hexanes/EtOAc 80:20)  $R_f = 0.70$ ;  $[\alpha]_D^{22} -0.117$  ( $c = 0.86$ ,  $\text{CHCl}_3$ ); IR (thin film)  $\nu_{\text{max}} = 2941, 2865, 2101, 1736, 1493, 1463, 1389, 1367, 1281, 1255, 1219, 1189, 1096, 1052, 1014, 995, 918, 882, 808, 754, 679, 657 \text{ cm}^{-1}$ ;  $^1\text{H NMR}$  (400 MHz,  $\text{CDCl}_3$ )  $\delta$  7.45 (d,  $J = 8.1 \text{ Hz}$ , 2H), 7.14 (d,  $J = 7.9 \text{ Hz}$ , 2H), 5.20 (d,  $J = 5.3 \text{ Hz}$ , 1H), 4.99 (t,  $J = 5.2 \text{ Hz}$ , 1H), 4.16 (td,  $J = 5.0, 4.0 \text{ Hz}$ , 1H), 3.83 (t,  $J = 5.4 \text{ Hz}$ , 1H), 3.76 (t,  $J = 7.0 \text{ Hz}$ , 2H), 3.41 (t,  $J = 4.6 \text{ Hz}$ , 2H), 3.38 (s, 3H), 2.34 (s, 3H), 2.32 (s, 2H), 1.62 (td,  $J = 6.9, 0.9 \text{ Hz}$ , 2H), 1.11 – 1.01 (m, 27H);  $^{13}\text{C NMR}$  (101 MHz,  $\text{CDCl}_3$ )  $\delta$  171.31, 138.31, 133.40 (2C), 129.77 (2C), 128.82, 88.87, 82.32, 81.05, 72.14, 60.08, 58.71, 52.73, 46.25, 44.51, 32.65, 27.49, 27.47, 21.14, 18.05 (6C), 11.98 (3C); HRMS (ESI+)  $m/z$  calcd for  $\text{C}_{29}\text{H}_{49}\text{N}_3\text{O}_5\text{NaSi}$  [ $\text{M} + \text{Na}$ ] 602.3060, found: 602.3016.

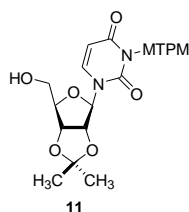

MTPM-protected uridine **11** was synthesized according to the reported procedure<sup>2</sup>: TLC (hexanes/EtOAc 33:67)  $R_f = 0.50$ ;  $[\alpha]_D^{22} -2.315$  ( $c = 8.98$ ,  $\text{CHCl}_3$ ); IR (thin film)  $\nu_{\text{max}} = 3478$  (br), 3057, 2986, 2940, 1715, 1663, 1598, 1556, 1455, 1374, 1265, 1212, 1066, 1039, 853, 808, 787, 732, 702  $\text{cm}^{-1}$ ;  $^1\text{H NMR}$  (400 MHz,  $\text{CDCl}_3$ )  $\delta$  7.51 (ddd,  $J = 17.3, 8.5, 0.7 \text{ Hz}$ , 1H), 7.33 – 7.27 (m, 2H), 7.18 (ddd,  $J = 8.8, 6.9, 2.1 \text{ Hz}$ , 1H), 6.85 (d,  $J = 5.1 \text{ Hz}$ , 2H), 6.51 (d,  $J = 3.7 \text{ Hz}$ , 1H), 5.72 (dd,  $J = 8.1, 4.0 \text{ Hz}$ , 1H), 5.60 – 5.51 (m, 2H), 5.48 (dd,  $J = 12.6, 2.1 \text{ Hz}$ , 1H), 4.95 – 4.93 (m, 1H), 4.92 (t,  $J = 2.4 \text{ Hz}$ , 1H), 4.30 – 4.25 (m, 1H), 3.89 (ddd,  $J = 11.7, 9.1, 2.6 \text{ Hz}$ , 1H), 3.82 – 3.73 (m, 4H), 1.57 (s, 3H), 1.36 (d,  $J = 2.4 \text{ Hz}$ , 3H);  $^{13}\text{C NMR}$  (101 MHz,  $\text{CDCl}_3$ )  $\delta$  162.10, 162.05, 159.51, 150.97, 150.91, 141.55, 141.31, 136.88, 135.28, 135.22, 134.02, 134.00, 133.84, 133.71, 131.17, 129.38, 126.22, 126.18, 125.44, 125.40, 115.33, 114.29, 114.26, 102.05, 102.01, 97.16, 96.82, 87.15, 87.06, 83.76, 83.65, 80.29, 69.50, 62.76, 62.72, 55.69, 27.25, 25.25; HRMS (ESI+)  $m/z$  calcd for  $\text{C}_{27}\text{H}_{26}\text{N}_2\text{O}_8\text{NaCl}_4$  [ $\text{M} + \text{Na}$ ] 669.0341, found: 669.0324.

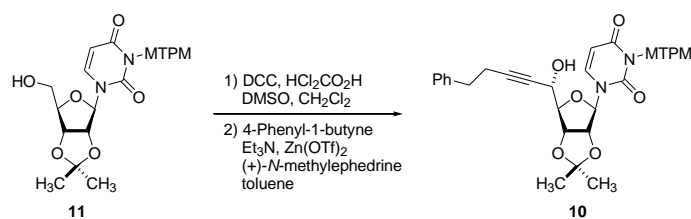

To a stirred solution of **11** (0.65 g, 1.0 mmol) and dichloroacetic acid (0.12 mL, 1.5 mmol) in  $\text{CH}_2\text{Cl}_2$  (5.0 mL) and DMSO (1.0 mL) was added DIC (0.23 mL, 1.5 mmol) at 0 °C, and the reaction mixture was warmed to rt. After 8 h, the reaction was quenched with saturated  $\text{NaHCO}_3$  (aq.) and extracted with EtOAc. The combined organic extracts were dried over  $\text{Na}_2\text{SO}_4$  and concentrated in vacuo. The precipitates were filtered, and the crude mixture was used for next reaction without purification. To a suspension of  $\text{Zn}(\text{OTf})_2$  (1.45 g, 4.0 mmol) and (+)-*N*-methylephedrine (0.79 g, 4.8 mmol) in toluene (6 mL) was added  $\text{Et}_3\text{N}$  (0.61 mL, 4.8 mmol) at rt. After 2 h, 4-phenyl-1-butyne (0.62 mL, 4.8 mmol) was added. After 4 h, a solution of crude aldehyde (0.65 g, 1.0 mmol) in toluene (5 mL) was added. The reaction mixture was stirred for 16 h and quenched with saturated  $\text{NaHCO}_3$  (aq.), extracted with EtOAc. The combined organic extracts were dried over  $\text{Na}_2\text{SO}_4$  and concentrated in vacuo. The crude mixture was purified by silica gel column chromatography (hexanes/EtOAc 60:40) to afford desired **10** (0.62 g, 0.80 mmol, 80% for 2 steps). Data for desired **10**: TLC (hexanes/EtOAc 50:50)  $R_f = 0.30$ ;  $[\alpha]_D^{22} - 0.116$  ( $c = 2.17$ ,  $\text{CHCl}_3$ ); IR (thin film)  $\nu_{\text{max}} = 3387$  (br), 3087, 2981, 2937, 1716, 1664, 1597, 1556, 1454, 1374, 1276, 1211, 1156, 1065, 1039, 916, 856, 807, 786, 733, 698  $\text{cm}^{-1}$ ;  $^1\text{H}$  NMR (400 MHz,  $\text{CDCl}_3$ )  $\delta$  7.53 (ddd,  $J = 20.4, 8.5, 0.7$  Hz, 1H), 7.35 – 7.27 (m, 4H), 7.24 – 7.15 (m, 4H), 6.85 (d,  $J = 5.1$  Hz, 2H), 6.51 (d,  $J = 5.4$  Hz, 1H), 5.68 (dd,  $J = 8.1, 4.1$  Hz, 1H), 5.60 – 5.50 (m, 3H), 4.89 – 4.78 (m, 2H), 4.57 (ddt,  $J = 12.0, 4.3, 2.0$  Hz, 1H), 4.24 (dd,  $J = 4.4, 3.1$  Hz, 1H), 3.78 (d,  $J = 3.3$  Hz, 3H), 2.83 (t,  $J = 7.5$  Hz, 2H), 2.53 (td,  $J = 7.4, 2.0$  Hz, 2H), 1.57 (s, 3H), 1.36 (s, 3H);  $^{13}\text{C}$  NMR (101 MHz,  $\text{CDCl}_3$ )  $\delta$  162.11, 162.08, 159.50, 150.87, 150.85, 141.07, 140.84, 140.30, 140.27, 136.90, 135.36, 135.29, 133.99, 133.95, 133.79, 133.64, 131.21, 129.37, 129.34, 128.41, 128.39, 126.40, 126.21, 126.18, 125.49, 125.44, 115.34, 115.32, 114.28, 114.24, 101.79, 101.74, 96.69, 96.37, 89.23, 89.19, 86.83, 86.73, 84.09, 83.93, 80.91, 69.46, 63.02, 62.99, 55.68, 34.72, 34.70, 27.16, 25.29, 20.87, 20.85; HRMS (ESI+)  $m/z$  calcd for  $\text{C}_{37}\text{H}_{34}\text{N}_2\text{O}_8\text{NaCl}_4$  [M + Na] 797.0967, found: 797.1004.

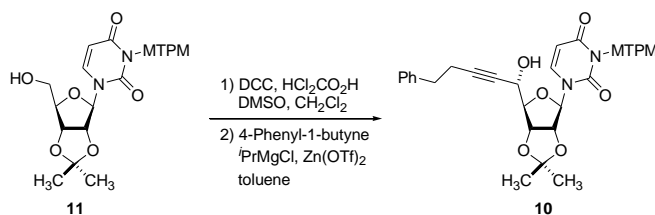

To a stirred solution of **11** (1.02 g, 1.58 mmol) and dichloroacetic acid (0.20 mL, 2.37 mmol) in  $\text{CH}_2\text{Cl}_2$  (8 mL) and DMSO (1.58 mL) was added DIC (0.37 mL, 2.37 mmol) at 0 °C, and the reaction mixture was warmed to rt. After 16 h, the reaction was quenched with saturated  $\text{NaHCO}_3$  (aq.) and extracted with EtOAc. The combined organic extracts were dried over  $\text{Na}_2\text{SO}_4$  and concentrated in vacuo. The precipitates were filtered, and the crude mixture was used for next reaction without purification. To a stirred solution of

4-phenyl-1-butyne (1.1 mL, 7.90 mmol) in toluene (5 mL) was added i-PrMgCl (2.0M in THF, 4.0 mL, 7.90 mmol) at 0 °C. After 3 h, dry Zn(OTf)<sub>2</sub> was added and the reaction mixture was warmed up to rt. After 3 h, a solution of crude aldehyde (xxx g, 1.58 mmol) in toluene (5 mL) was added. The reaction mixture was stirred for 20 h and quenched with saturated NaHCO<sub>3</sub> (aq.), extracted with EtOAc. The combined organic extracts were dried over Na<sub>2</sub>SO<sub>4</sub> and concentrated in vacuo. The crude mixture was purified by silica gel column chromatography (hexanes/EtOAc 60:40) to afford desired **10** (0.64 g, 0.84 mmol, 53% for 2 steps) and undesired epimer (0.28 g, 0.35 mmol, 22% for 2 steps). Data for undesired epimer: TLC (hexanes/EtOAc 50:50) *R*<sub>f</sub> = 0.40; [α]<sub>D</sub><sup>22</sup> -0.851 (*c* = 2.80, CHCl<sub>3</sub>); IR (thin film) *v*<sub>max</sub> = 3429 (br), 3087, 2987, 2938, 1716, 1663, 1597, 1556, 1454, 1374, 1342, 1276, 1239, 1213, 1066, 1039, 917, 859, 807, 787, 750, 699 cm<sup>-1</sup>; <sup>1</sup>H NMR (400 MHz, CDCl<sub>3</sub>) δ 7.54 (dd, *J* = 14.6, 8.5 Hz, 1H), 7.37 – 7.27 (m, 4H), 7.25 – 7.15 (m, 4H), 6.85 (d, *J* = 3.4 Hz, 2H), 6.52 (d, *J* = 4.2 Hz, 1H), 5.70 (dd, *J* = 8.1, 2.3 Hz, 1H), 5.63 – 5.52 (m, 3H), 4.91 (ddd, *J* = 11.6, 6.4, 2.4 Hz, 1H), 4.78 (ddd, *J* = 18.8, 6.3, 3.7 Hz, 1H), 4.59 (ddt, *J* = 8.7, 3.0, 2.0 Hz, 1H), 4.28 (t, *J* = 2.7 Hz, 1H), 3.78 (d, *J* = 1.9 Hz, 3H), 2.84 (t, *J* = 7.4 Hz, 2H), 2.54 (td, *J* = 7.5, 2.0 Hz, 2H), 1.59 (s, 3H), 1.38 (s, 3H); <sup>13</sup>C NMR (101 MHz, CDCl<sub>3</sub>) δ 162.05, 159.48, 150.95, 140.65, 140.43, 140.27, 140.24, 136.92, 135.42, 133.91, 133.75, 133.64, 131.22, 129.34, 128.42 (4C), 126.42, 126.14, 126.12, 125.56, 115.31, 114.22, 114.19, 101.96, 101.92, 96.06, 95.70, 88.25, 88.20, 87.57, 87.51, 83.36, 83.22, 80.21, 80.15, 69.64, 69.57, 62.99, 55.68, 34.68, 34.66, 27.29, 25.32, 20.89, 20.88; HRMS (ESI+) *m/z* calcd for C<sub>37</sub>H<sub>34</sub>N<sub>2</sub>O<sub>8</sub>NaCl<sub>4</sub> [M + Na] 797.0967, found: 797.0894.

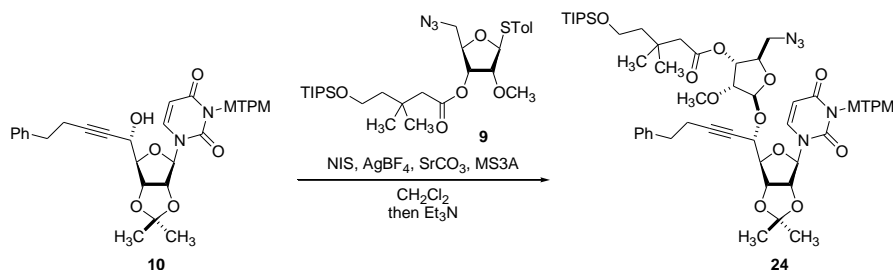

To a stirred suspension of **10** (0.42 g, 0.54 mmol), **9** (0.63 g, 1.08 mmol), MS3A (1.70 g) and SrCO<sub>3</sub> (0.80 g, 5.40 mmol) in CH<sub>2</sub>Cl<sub>2</sub> (22 mL) were added AgBF<sub>4</sub> (53 mg, 0.27 mmol) and NIS (0.24 g, 1.08 mmol) at 0 °C. After 8 h, the reaction mixture was added Et<sub>3</sub>N (2 mL) and passed through a silica gel pad (hexanes/EtOAc 1:1). The combined organic phase was concentrated in vacuo. The crude mixture was purified by silica gel column chromatography (hexanes/EtOAc 90:10 to 80:20 to 70:30) to afford **24** (0.60 g, 0.49 mmol, 91%): TLC (hexanes/EtOAc 70:30) *R*<sub>f</sub> = 0.40; [α]<sub>D</sub><sup>23</sup> +0.020 (*c* = 0.48, CHCl<sub>3</sub>); IR (thin film) *v*<sub>max</sub> = 2940, 2866, 2101, 1723, 1675, 1600, 1556, 1455, 1374, 1278, 1214, 1099, 1070, 882, 747, 681 cm<sup>-1</sup>; <sup>1</sup>H NMR (400 MHz, CDCl<sub>3</sub>) δ 7.54 (dd, *J* = 20.0, 8.5 Hz, 1H), 7.35 – 7.27 (m, 4H), 7.24 – 7.16 (m, 4H), 6.85 (d, *J* = 6.0 Hz, 2H), 6.51 (d, *J* = 2.4 Hz, 1H), 5.71 – 5.65 (m, 2H), 5.60 – 5.49 (m, 2H), 5.22 (d, *J* = 4.5 Hz, 1H), 4.95 (ddd, *J* = 6.7, 4.9, 3.0 Hz, 1H), 4.79 (td, *J* = 6.9, 3.2 Hz, 1H), 4.60 (dddd, *J* = 16.8, 10.2, 5.2, 2.3 Hz, 2H), 4.29 (ddd, *J* = 6.5, 3.2, 1.6 Hz, 1H), 4.22 (tdd, *J* = 7.0, 3.6, 1.6 Hz, 1H), 3.88 (d, *J* = 4.9 Hz, 1H), 3.79 – 3.74 (m, 5H), 3.50 – 3.42 (m, 1H), 3.38 – 3.34 (m, 1H), 3.33 (d, *J* = 1.4 Hz, 3H), 2.84 (t, *J* = 7.3 Hz, 2H), 2.56 (tt, *J* = 7.7, 2.0 Hz, 2H), 2.33 (s, 2H), 1.62 (t, *J* = 6.9 Hz, 2H), 1.57 (s, 3H), 1.36 (s, 3H), 1.11 – 1.01 (m, 27H); <sup>13</sup>C NMR (101 MHz, CDCl<sub>3</sub>) δ 171.42, 162.11, 162.10, 159.48, 150.72, 150.67, 140.23, 140.15, 140.12, 140.00, 136.92, 135.43, 135.31, 133.93, 133.88, 133.76, 133.61, 131.24, 129.36,

129.30, 128.47 (2C), 128.46 (2C), 128.39 (2C), 126.47, 126.45, 126.17, 126.12, 125.55, 125.44, 115.31, 115.28, 114.28, 104.40, 104.36, 101.81, 101.78, 94.95, 94.67, 88.70, 88.21, 88.01, 84.38, 84.30, 82.15, 81.37, 81.28, 80.02, 73.26, 73.20, 69.54, 69.41, 68.58, 68.49, 60.03, 58.51, 58.50, 55.66, 53.60, 53.55, 46.18, 44.51, 36.62, 34.49, 34.47, 32.64, 27.41, 27.39, 27.10, 25.38, 20.84, 18.03 (6C), 11.93 (3C) ; HRMS (ESI+)  $m/z$  calcd for  $C_{59}H_{75}N_5O_{13}NaSiCl_4$  [M + Na] 1252.3782, found: 1252.3826.

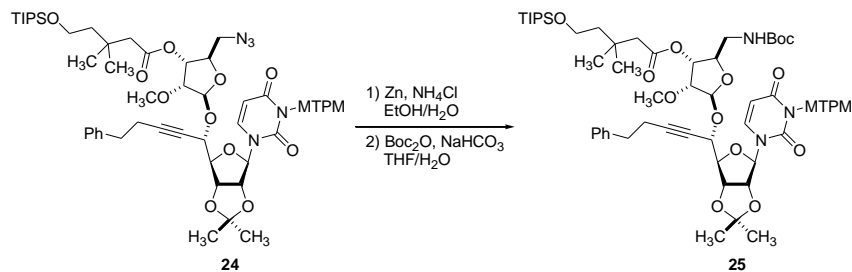

A suspended solution of **24** (0.60 g, 0.49 mmol),  $\text{NH}_4\text{Cl}$  (0.52 g, 9.8 mmol) and Zn (0.64 g, 9.8 mmol) in EtOH/ $\text{H}_2\text{O}$  (9:1, 9.8 mL) was stirred at 80 °C for 8 h and cooled to rt. The precipitates were filtered and the combined organic solution was concentrated in vacuo. The crude mixture was used for the next reaction without purification. To a stirred solution of crude mixture in THF (9.8 mL) were added saturated  $\text{NaHCO}_3$  (aq., 9.8 mL) and  $\text{Boc}_2\text{O}$  (0.32 g, 1.47 mmol). The reaction mixture was stirred for 6 h at rt, and the aqueous layer was extracted with EtOAc. The combined organic extracts were dried over  $\text{Na}_2\text{SO}_4$  and concentrated in vacuo. The crude mixture was purified by silica gel column chromatography (hexanes/EtOAc 80:20 to 67:33) to afford **25** (0.57 g, 0.44 mmol, 90% for 2 steps): TLC (hexanes/EtOAc 67:33)  $R_f$  = 0.20;  $[\alpha]_D^{22}$  -0.060 ( $c$  = 2.93,  $\text{CHCl}_3$ ); IR (thin film)  $\nu_{\text{max}}$  = 3387 (br), 2939, 2866, 1717, 1672, 1598, 1556, 1512, 1454, 1365, 1276, 1247, 1212, 1160, 1096, 1067, 1045, 881, 786, 680  $\text{cm}^{-1}$ ;  $^1\text{H}$  NMR (400 MHz,  $\text{CDCl}_3$ )  $\delta$  7.53 (dd,  $J$  = 18.8, 8.8 Hz, 1H), 7.34 – 7.26 (m, 4H), 7.23 – 7.16 (m, 4H), 6.84 (d,  $J$  = 6.4 Hz, 2H), 6.50 (d,  $J$  = 3.7 Hz, 1H), 5.71 – 5.63 (m, 2H), 5.59 – 5.48 (m, 2H), 5.41 – 5.31 (m, 1H), 5.29 – 5.20 (m, 1H), 4.99 – 4.89 (m, 1H), 4.84 – 4.75 (m, 1H), 4.67 – 4.59 (m, 1H), 4.58 – 4.42 (m, 1H), 4.33 – 4.27 (m, 1H), 4.22 – 4.15 (m, 1H), 3.91 – 3.86 (m, 1H), 3.79 – 3.74 (m, 5H), 3.49 – 3.39 (m, 1H), 3.36 – 3.32 (m, 1H), 3.31 (d,  $J$  = 0.9 Hz, 2H), 3.22 (dt,  $J$  = 13.2, 6.1 Hz, 1H), 2.83 (t,  $J$  = 7.3 Hz, 2H), 2.57 (tt,  $J$  = 7.6, 2.2 Hz, 2H), 2.31 (s, 2H), 1.62 (t,  $J$  = 6.9 Hz, 2H), 1.57 (s, 3H), 1.41 (s, 9H), 1.37 (s, 3H), 1.10 – 1.01 (m, 27H);  $^{13}\text{C}$  NMR (101 MHz,  $\text{CDCl}_3$ )  $\delta$  171.39, 159.49, 156.27, 150.73, 140.02, 136.91, 135.37, 135.28, 133.96, 133.91, 131.23, 129.36, 129.32, 128.48 (2C), 128.34 (2C), 126.48, 126.13, 125.38, 115.32, 115.28, 114.17, 104.40, 101.84, 84.39, 84.31, 79.65, 69.37, 60.05, 58.50, 55.66, 46.19, 44.66, 34.49, 32.60, 28.40, 28.21 (3C), 27.40, 27.31, 27.12, 25.40, 20.81, 18.03 (6C), 11.94 (3C); HRMS (ESI+)  $m/z$  calcd for  $C_{64}H_{85}N_3O_{15}NaSiCl_4$  [M + Na] 1326.4402, found: 1326.4432.



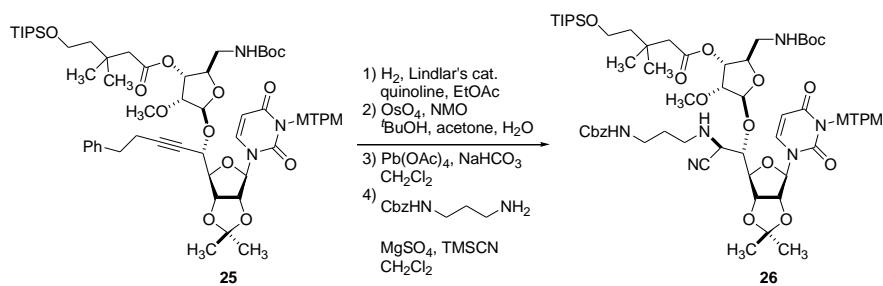

To a stirred solution of **25** (0.26 g, 0.20 mmol) and quinoline (46.4  $\mu\text{L}$ , 0.39 mmol) in EtOAc (100 mL) was added Lindlar catalyst (100 mg).  $\text{H}_2$  gas was introduced and the reaction mixture was stirred for 10 h under  $\text{H}_2$  atmosphere at rt. The solution was filtered through Celite and washed with 1N HCl (aq.). The combined organic solution was dried over  $\text{Na}_2\text{SO}_4$ , concentrated in vacuo. The crude mixture was used for the next reaction without purification. To a stirred solution of the crude mixture and NMO (0.23 g, 2.0 mmol) in t-BuOH/acetone (1:1, 5.0 mL) was added  $\text{OsO}_4$  (4% in water, 2.5 mL, 0.39 mmol) at rt. The reaction mixture was stirred for 8 h, diluted with EtOAc and quenched with saturated  $\text{NaHCO}_3$  aq./ saturated  $\text{Na}_2\text{SO}_3$  aq. (2:1). The heterogeneous mixture was stirred for 30 min, extracted with EtOAc. The combined organic extracts were dried over  $\text{Na}_2\text{SO}_4$  and concentrated in vacuo. The crude mixture was passed through a silica gel pad (hexanes/EtOAc 33:67) to afford diol. To a stirred solution of diol (0.21 g, 0.16 mmol) and  $\text{NaHCO}_3$  (0.13 g, 1.56 mmol) in  $\text{CH}_2\text{Cl}_2$  (1.6 mL) was added  $\text{Pb(OAc)}_4$  (0.12 g, 0.28 mmol) at 0  $^\circ\text{C}$ . The reaction mixture was stirred for 1 h at 0  $^\circ\text{C}$  and quenched with saturated  $\text{NaHCO}_3$  aq., extracted with EtOAc. The combined organic extracts were dried over  $\text{Na}_2\text{SO}_4$  and concentrated in vacuo. The crude mixture was used for the next reaction without purification. A  $\text{CH}_2\text{Cl}_2$  (1.0 mL) solution of the crude mixture of **8**, Cbz-protected 1,3-diaminopropane (0.11 g, 0.47 mmol) and  $\text{MgSO}_4$  (0.19 g, 1.56 mmol) were stirred at rt. After 3 h, the reaction was added TMSCN (58.4  $\mu\text{L}$ , 0.47 mmol) and stirred for 20 h at rt. After completion, the reaction mixture was quenched with saturated  $\text{NaHCO}_3$  aq., extracted with EtOAc. The combined organic extracts were dried over  $\text{Na}_2\text{SO}_4$  and concentrated in vacuo. The crude product was purified by silica gel column chromatography (hexanes/EtOAc 67:33 to 50:50) to afford **26** (0.17 g, 0.12 mmol, 60% for 4 steps): TLC (hexanes/EtOAc 50:50)  $R_f = 0.40$ ;  $[\alpha]_D^{22} -0.034$  ( $c = 0.17$ ,  $\text{CHCl}_3$ ); IR (thin film)  $\nu_{\text{max}} = 3359$  (br), 2927, 2865, 1716, 1678, 1600, 1525, 1456, 1367, 1251, 1070  $\text{cm}^{-1}$ ;  $^1\text{H}$  NMR (400 MHz,  $\text{CDCl}_3$ )  $\delta$  7.45 (dd,  $J = 17.6, 8.4$  Hz, 1H), 7.41 – 7.28 (m, 5H), 7.24 – 7.16 (m, 4H), 6.88 (d,  $J = 5.3$  Hz, 2H), 6.46 (d,  $J = 12.9$  Hz, 1H), 6.03 – 5.96 (m, 1H), 5.74 – 5.68 (m, 1H), 5.58 – 5.48 (m, 2H), 5.43 (d,  $J = 8.7$  Hz, 2H), 5.36 – 5.16 (m, 3H), 5.07 (dd,  $J = 11.9, 6.7$  Hz, 3H), 5.00 (d,  $J = 2.9$  Hz, 1H), 4.93 (t,  $J = 6.6$  Hz, 1H), 4.86 (d,  $J = 15.2$  Hz, 1H), 4.22 (d,  $J = 4.2$  Hz, 2H), 4.18 (s, 2H), 4.03 (dd,  $J = 7.8, 4.9$  Hz, 1H), 3.84 – 3.74 (m, 3H), 3.46 – 3.16 (m, 5H), 3.04 (q,  $J = 5.7$  Hz, 1H), 2.99 – 2.88 (m, 1H), 2.88 – 2.73 (m, 1H), 2.73 – 2.47 (m, 2H), 2.38 – 2.25 (m, 2H), 1.69 (t,  $J = 5.8$  Hz, 2H), 1.59 (s, 3H), 1.47 – 1.37 (m, 12H), 1.11 – 1.02 (m, 27H);  $^{13}\text{C}$  NMR (101 MHz,  $\text{CDCl}_3$ )  $\delta$  171.11, 159.62, 156.44, 156.22, 142.48, 136.86, 136.81, 134.66, 134.30, 134.06, 131.10, 129.55, 128.68 (2C), 128.50 (2C), 128.44, 128.35, 128.17, 128.12, 128.08, 126.45, 125.01, 115.44, 114.18, 108.03, 101.87, 98.74, 84.87, 82.92, 82.30, 79.06, 66.57, 60.37, 60.09, 58.48, 55.72, 51.72, 46.22, 45.29, 44.71, 41.29, 32.61, 29.68, 28.47 (3C), 28.45, 28.37, 28.35, 27.37, 27.29, 26.95, 25.19, 21.02, 18.06 (6C), 14.19, 14.09, 11.96 (3C); HRMS (ESI+)  $m/z$  calcd for  $\text{C}_{67}\text{H}_{93}\text{N}_6\text{O}_{17}\text{SiCl}_4$  [M + H] 1421.5121, found: 1421.5131.

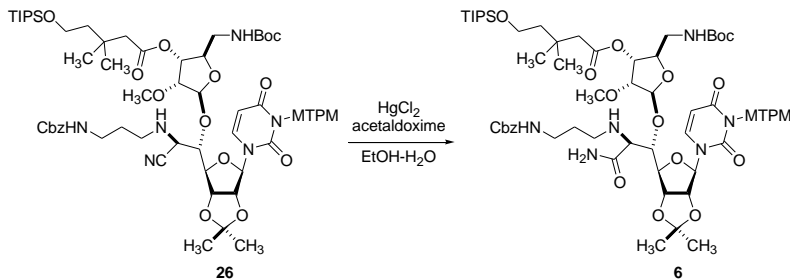

To a stirred solution of **26** (0.17 g, 0.12 mmol) in EtOH/H<sub>2</sub>O (9:1, 2.4 mL) were added HgCl<sub>2</sub> (64.1 mg, 0.24 mmol) and acetaldoxime (72.0 μL, 1.18 mmol) at rt. The reaction mixture was stirred for 6 h at rt, added E<sub>3</sub>N (49.4 μL, 0.35 mmol) and concentrated under reduced pressure. The crude product was purified by silica gel column chromatography (CHCl<sub>3</sub>/MeOH 98:2 to 95:5) to afford **6** (0.12 g, 0.082 mmol, 69%): TLC (CHCl<sub>3</sub>/MeOH 95:5) *R<sub>f</sub>* = 0.40; [α]<sub>D</sub><sup>21</sup> +0.198 (*c* = 0.32, MeOH); IR (thin film)  $\nu_{\text{max}}$  = 3334 (br), 2928, 2865, 1715, 1701, 1677, 1524, 1456, 1367, 1250, 1100, 1071, 1047, 882 cm<sup>-1</sup>; <sup>1</sup>H NMR (500 MHz, CD<sub>3</sub>OD) δ 7.64 (d, *J* = 8.5 Hz, 1H), 7.56 – 7.50 (m, 1H), 7.40 (dt, *J* = 6.0, 3.0 Hz, 1H), 7.37 – 7.31 (m, 5H), 7.28 (ddd, *J* = 8.4, 5.3, 2.6 Hz, 2H), 6.96 (d, *J* = 23.0 Hz, 2H), 6.55 (d, *J* = 69.8 Hz, 1H), 5.75 – 5.68 (m, 1H), 5.64 (dd, *J* = 15.7, 1.8 Hz, 1H), 5.61 – 5.52 (m, 2H), 5.28 (ddd, *J* = 27.8, 6.7, 3.4 Hz, 1H), 5.13 – 5.01 (m, 4H), 4.94 – 4.81 (m, 1H), 4.35 (dd, *J* = 21.6, 9.5 Hz, 1H), 4.24 (d, *J* = 7.6 Hz, 1H), 4.14 (tq, *J* = 5.6, 2.7 Hz, 1H), 3.91 (dd, *J* = 7.0, 4.9 Hz, 1H), 3.83 (td, *J* = 6.8, 1.5 Hz, 2H), 3.80 (d, *J* = 13.5 Hz, 3H), 3.43 – 3.38 (m, 1H), 3.36 (d, *J* = 3.5 Hz, 3H), 3.22 (t, *J* = 6.8 Hz, 2H), 3.18 – 3.10 (m, 1H), 2.72 – 2.59 (m, 1H), 2.58 – 2.46 (m, 1H), 2.35 (dd, *J* = 13.5, 1.1 Hz, 1H), 2.32 – 2.27 (m, 1H), 1.69 – 1.60 (m, 4H), 1.58 (s, 3H), 1.45 (d, *J* = 4.7 Hz, 2H), 1.42 (d, *J* = 2.8 Hz, 9H), 1.40 (d, *J* = 8.4 Hz, 3H), 1.13 – 1.05 (m, 27H); <sup>13</sup>C NMR (101 MHz, CD<sub>3</sub>OD) δ 172.91, 164.65, 161.41, 158.91, 158.26, 152.32, 138.54, 138.13, 135.21, 134.97, 132.64, 130.31, 129.51 (2C), 128.98, 128.81 (2C), 127.40, 126.71, 116.49, 115.31, 108.56, 102.45, 98.20, 85.76, 84.69, 84.24, 84.06, 81.34, 80.39, 79.47, 78.22, 77.69, 73.60, 70.88, 67.37, 63.12, 61.50, 58.75, 56.53, 47.09, 46.85, 45.39, 39.70, 35.70, 33.59, 32.75, 31.11, 28.92 (3C), 28.27, 28.22, 27.51, 25.76, 25.70, 23.70, 18.60 (6C), 13.22 (3C); HRMS (ESI+) *m/z* calcd for C<sub>67</sub>H<sub>95</sub>N<sub>6</sub>O<sub>18</sub>SiCl<sub>4</sub> [M + H] 1439.5226, found: 1439.5168.

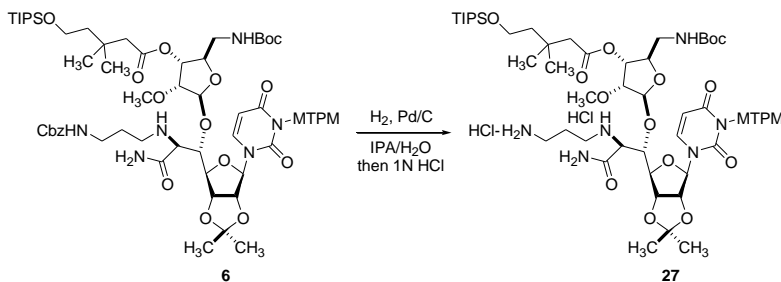

To a stirred solution of **6** (12.0 mg, 8.37 μmol) in IPA/H<sub>2</sub>O/AcOH (95:5:1, 6.0 mL) was added Pd/C (10wt % 6.0 mg) under N<sub>2</sub> atmosphere. H<sub>2</sub> gas was introduced and the reaction mixture was stirred for 3 h under H<sub>2</sub>. The solution was filtered through Celite and concentrated in vacuo. The crude mixture was used for the next reaction without purification: <sup>1</sup>H NMR (500 MHz, CD<sub>3</sub>OD) δ 7.64 (d, *J* = 8.5 Hz, 1H), 7.56 – 7.50 (m, 1H), 7.40 (dd, *J* = 6.3, 2.1 Hz, 1H), 7.28 (ddd, *J* = 8.4, 5.3, 2.5 Hz, 2H), 6.96 (d, *J* = 23.0 Hz, 2H), 6.55 (d, *J*

= 69.8 Hz, 1H), 5.71 (dd,  $J$  = 8.0, 3.6 Hz, 1H), 5.64 (dd,  $J$  = 15.7, 1.8 Hz, 1H), 5.28 (ddd,  $J$  = 27.8, 6.7, 3.3 Hz, 1H), 5.14 – 5.01 (m, 1H), 4.35 (dd,  $J$  = 21.6, 9.5 Hz, 1H), 4.24 (q,  $J$  = 3.4 Hz, 1H), 4.19 – 4.09 (m, 1H), 3.91 (dd,  $J$  = 7.0, 4.9 Hz, 1H), 3.87 – 3.76 (m, 6H), 3.44 – 3.34 (m, 1H), 3.25 – 3.09 (m, 1H), 2.65 (tq,  $J$  = 16.8, 9.8, 8.3 Hz, 1H), 2.52 (ddd,  $J$  = 27.7, 12.2, 6.7 Hz, 1H), 2.39 – 2.25 (m, 2H), 1.64 (ddt,  $J$  = 14.2, 7.6, 4.1 Hz, 2H), 1.58 (s, 3H), 1.46 – 1.35 (m, 12H), 1.15 – 1.03 (m, 21H); HRMS (ESI+)  $m/z$  calcd for  $C_{59}H_{89}N_6O_{16}SiCl_4$  [ $M + H$ ] 1305.4858, found: 1305.4887.

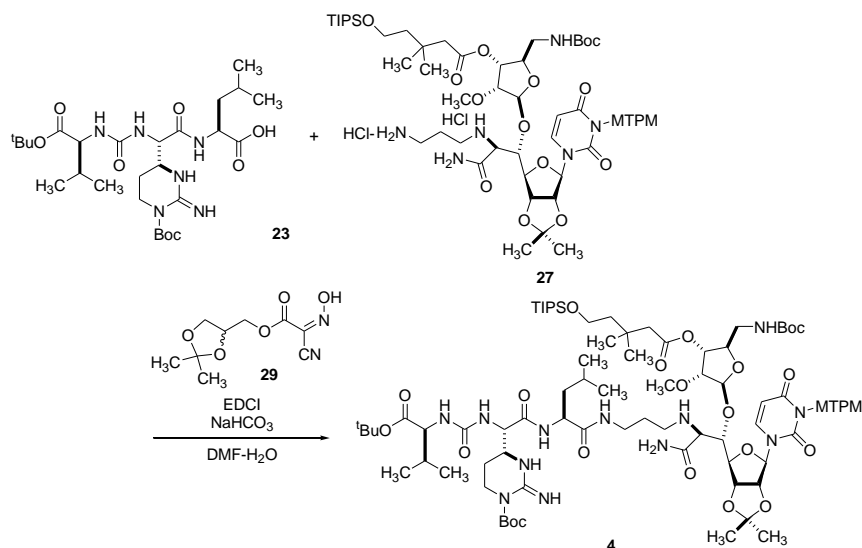

To a stirred solution of **27** (10.5 mg, 8.05  $\mu$ mol), **23** (9.4 mg, 0.016 mmol),  $NaHCO_3$  (13.5 mg, 0.16 mmol) and **29** (9.1 mg, 0.040 mmol) in  $DMF/H_2O$  (25:1, 0.3 mL) was added EDCI (7.7 mg, 0.040 mmol). The reaction mixture was stirred for 3 h at rt, quenched with saturated  $NaHCO_3$  (aq.), extracted with  $CHCl_3$ . The combined organic extracts were dried over  $Na_2SO_4$  and concentrated in vacuo. The crude mixture was purified by silica gel column chromatography ( $CHCl_3/MeOH$  95:5 to 90:10) to afford desired **4** (13.8 mg, 7.33  $\mu$ mol, 91%):  $^1H$  NMR (500 MHz,  $CD_3OD$ )  $\delta$  7.74 – 7.46 (m, 2H), 7.41 (t,  $J$  = 2.9 Hz, 1H), 7.38 – 7.22 (m, 2H), 6.97 (d,  $J$  = 15.2 Hz, 2H), 6.57 (d,  $J$  = 62.4 Hz, 1H), 5.76 (t,  $J$  = 6.7 Hz, 1H), 5.70 (d,  $J$  = 15.1 Hz, 1H), 5.58 (q,  $J$  = 10.3 Hz, 2H), 5.28 (d,  $J$  = 27.5 Hz, 1H), 5.04 (d,  $J$  = 8.3 Hz, 1H), 4.92 (dd,  $J$  = 10.0, 4.3 Hz, 1H), 4.74 (dd,  $J$  = 23.4, 5.7 Hz, 1H), 4.51 (d,  $J$  = 4.8 Hz, 2H), 4.42 – 4.36 (m, 1H), 4.33 (q,  $J$  = 7.1 Hz, 2H), 4.24 (s, 1H), 4.17 – 4.07 (m, 2H), 4.04 (d,  $J$  = 4.0 Hz, 1H), 3.91 (d,  $J$  = 5.1 Hz, 1H), 3.88 – 3.78 (m, 6H), 3.72 – 3.62 (m, 1H), 3.54 – 3.43 (m, 2H), 3.43 – 3.34 (m, 2H), 2.76 – 2.49 (m, 2H), 2.38 – 2.28 (m, 2H), 2.22 – 2.07 (m, 2H), 2.04 (dq,  $J$  = 13.7, 4.5 Hz, 2H), 1.82 (dtd,  $J$  = 14.0, 9.3, 4.9 Hz, 4H), 1.70 – 1.56 (m, 10H), 1.48 (d,  $J$  = 3.1 Hz, 9H), 1.46 (d,  $J$  = 3.9 Hz, 19H), 1.45 – 1.38 (m, 4H), 1.09 (d,  $J$  = 4.4 Hz, 21H), 0.99 – 0.89 (m, 12H); HRMS (ESI+)  $m/z$  calcd for  $C_{86}H_{135}N_{12}O_{23}SiCl_4$  [ $M + H$ ] 1871.8286, found: 1871.8354.

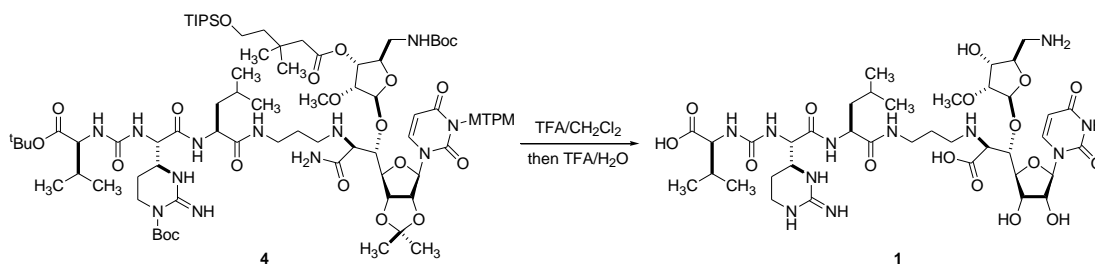

To a stirred solution of **4** (4.1 mg, 2.17  $\mu\text{mol}$ ) in  $\text{CH}_2\text{Cl}_2$  (0.30 mL) was added TFA (0.20 mL). The reaction mixture was stirred for 5 h at rt, and all volatile were evaporated in vacuo. To a stirred solution of the crude mixture in  $\text{H}_2\text{O}$  (0.2 mL) was added TFA (0.3 mL). The reaction mixture was stirred for 20 h at 60  $^\circ\text{C}$ , and all volatile were evaporated in vacuo. The crude mixture was purified by C18 reverse-phase HPLC [column: HYPERSIL GOLD<sup>TM</sup> (175  $\text{\AA}$ , 12  $\mu\text{m}$ , 250 x 10 mm), solvents: a gradient elution of 15:85 to 25:75 MeOH:0.1% TFA in  $\text{H}_2\text{O}$  over 20 min, flow rate: 2.0 mL/min, UV: 254 nm] to afford **1** (1.7 mg, 0.0018 mmol, 84%, retention time: 10 min):  $^1\text{H}$  NMR (500 MHz,  $\text{CD}_3\text{OD}$ )  $\delta$  7.69 (d,  $J$  = 8.0 Hz, 1H), 5.78 (d,  $J$  = 8.1 Hz, 1H), 5.68 (d,  $J$  = 3.4 Hz, 1H), 5.25 (d,  $J$  = 2.1 Hz, 1H), 4.49 (s, 1H), 4.46 (t,  $J$  = 4.4 Hz, 1H), 4.38 (d,  $J$  = 5.0 Hz, 1H), 4.36 (d,  $J$  = 5.6 Hz, 1H), 4.34 (d,  $J$  = 3.9 Hz, 1H), 4.32 (d,  $J$  = 7.1 Hz, 1H), 4.30 (s, 2H), 4.23 (t,  $J$  = 5.3 Hz, 1H), 4.19 (d,  $J$  = 5.0 Hz, 2H), 4.13 – 4.07 (m, 2H), 3.85 – 3.80 (m, 2H), 3.50 (s, 3H), 3.46 – 3.41 (m, 4H), 2.91 – 2.87 (m, 2H), 2.21 – 2.13 (m, 2H), 2.07 (dt,  $J$  = 13.9, 5.9 Hz, 2H), 1.87 (s, 2H), 1.64 (t,  $J$  = 7.2 Hz, 2H), 1.02 – 0.85 (m, 12H);  $^{13}\text{C}$  NMR (101 MHz,  $\text{CD}_3\text{OD}$ )  $\delta$  173.76, 173.14, 171.45, 170.55, 159.89, 82.72, 79.49, 61.53, 60.15, 56.84, 52.91, 41.77, 38.25, 37.62, 36.24, 32.20, 28.90, 28.57, 28.50, 28.46, 28.40, 28.36, 28.33, 28.26, 28.21, 26.06, 26.03, 23.60, 21.92, 19.63, 18.59, 18.03, 17.27, 17.08, 14.57, 13.22; HRMS (ESI<sup>+</sup>)  $m/z$  calcd for  $\text{C}_{38}\text{H}_{64}\text{N}_{11}\text{O}_{16}$  [ $\text{M} + \text{H}$ ] 930.4533, found 930.4516.

HPLC analysis of **1**.

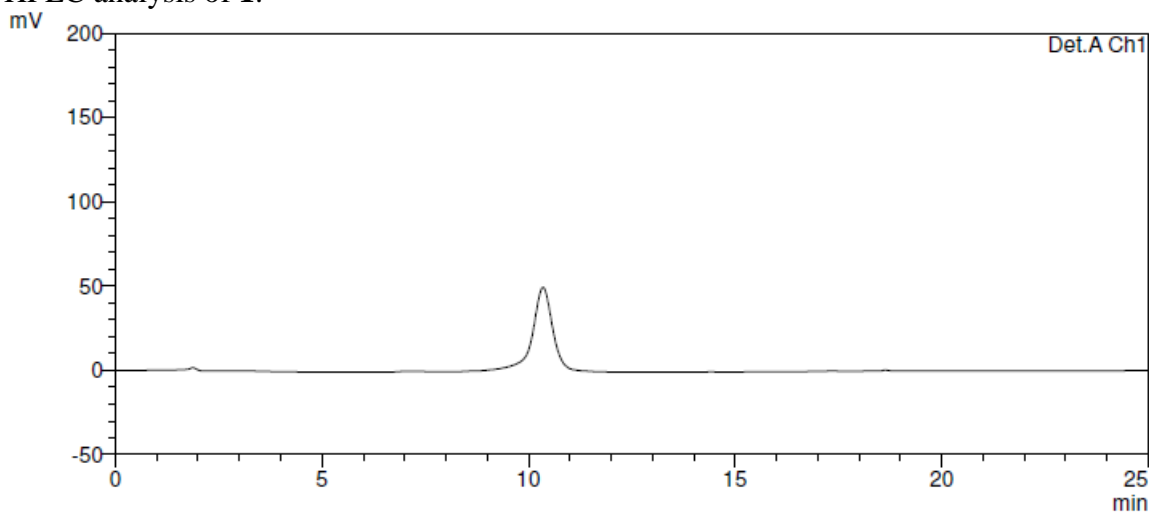

Conditions:

column: Phenomenex Kinetex 1.7  $\mu$  XB-C18 100  $\text{\AA}$  150 x 2.10 mm column, solvents: 25 : 75 MeOH : 0.1% TFA in water, UV: 254 nm

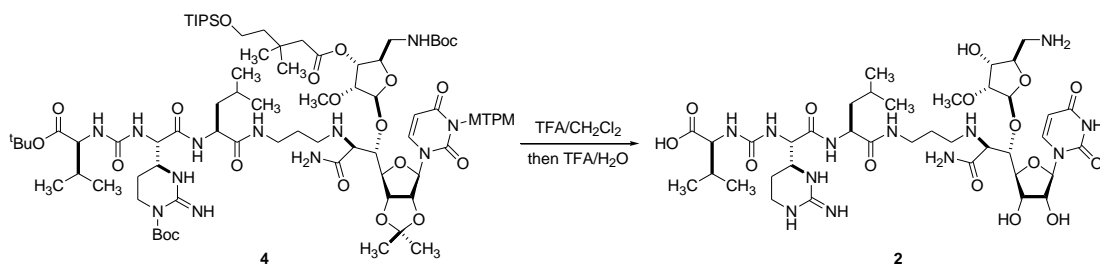

To a stirred solution of **4** (7.6 mg, 4.03  $\mu\text{mol}$ ) in  $\text{CH}_2\text{Cl}_2$  (0.30 mL) was added TFA (0.20 mL). The reaction mixture was stirred for 6 h at rt, and all volatile were evaporated in vacuo. To a stirred solution of the crude mixture in  $\text{H}_2\text{O}$  (0.3 mL) was added TFA (0.2 mL). The reaction mixture was stirred for 4 h at rt, and all volatile were evaporated in vacuo. The crude mixture was purified by C18 reverse-phase HPLC [column: HYPERSIL GOLD™ (175  $\text{\AA}$ , 12  $\mu\text{m}$ , 250 x 10 mm), solvents: a gradient elution of 15 : 85 to 25 : 75 MeOH : 0.1% TFA in  $\text{H}_2\text{O}$  over 20 min, flow rate: 2.0 mL/min, UV: 254 nm], to afford **2** (3.3 mg, 0.0035 mmol, 88% retention time: 17.5 min):  $^1\text{H}$  NMR (400 MHz,  $\text{CD}_3\text{OD}$ )  $\delta$  7.69 (d,  $J = 8.0$  Hz, 1H), 5.78 (d,  $J = 8.0$  Hz, 1H), 5.68 (d,  $J = 3.4$  Hz, 1H), 5.27 – 5.24 (m, 1H), 4.50 – 4.48 (m, 1H), 4.46 (dd,  $J = 5.0, 3.5$  Hz, 1H), 4.38 (d,  $J = 4.4$  Hz, 1H), 4.36 (d,  $J = 5.4$  Hz, 1H), 4.34 (d,  $J = 3.5$  Hz, 1H), 4.33 – 4.31 (m, 1H), 4.30 – 4.29 (m, 2H), 4.25 – 4.22 (m, 1H), 4.19 (d,  $J = 5.1$  Hz, 2H), 4.10 (d,  $J = 7.1$  Hz, 2H), 3.84 – 3.81 (m, 2H), 3.50 (s, 3H), 3.46 – 3.42 (m, 4H), 2.93 – 2.91 (m, 2H), 2.20 – 2.13 (m, 2H), 2.09 – 2.02 (m, 2H), 1.92 – 1.83 (m, 2H), 1.68 – 1.60 (m, 2H), 1.02 – 0.88 (m, 12H); HRMS (ESI+)  $m/z$  calcd for  $\text{C}_{38}\text{H}_{65}\text{N}_{12}\text{O}_{15}$  [M + H] 929.4692, found 929.4710.

HPLC analysis of **2**.

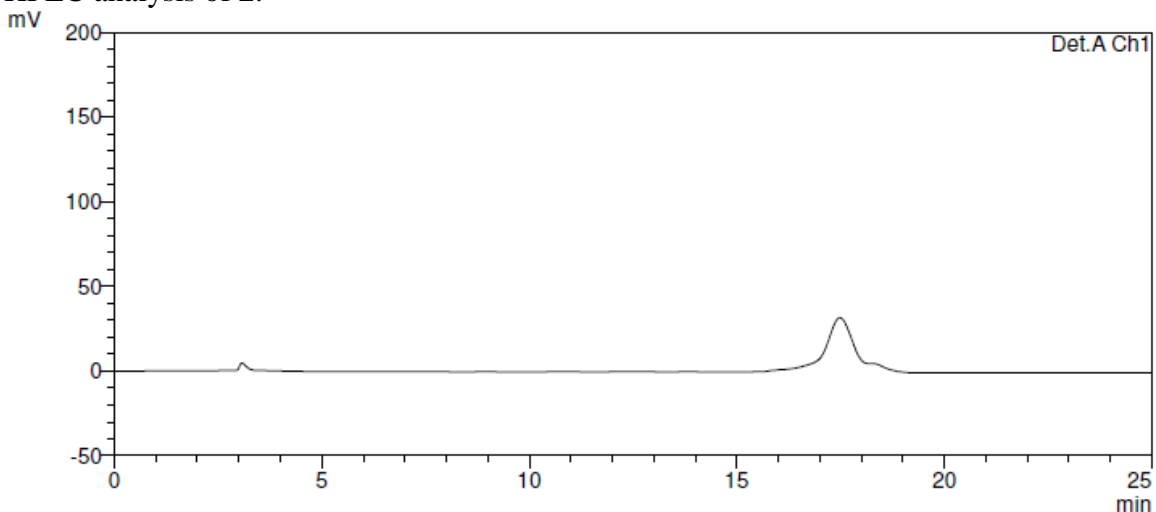

Conditions:

column: Phenomenex Kinetex 1.7  $\mu$  XB-C18 100  $\text{\AA}$  150 x 2.10 mm column, solvents: 25 : 75 MeOH : 0.1% TFA in water, UV: 254 nm

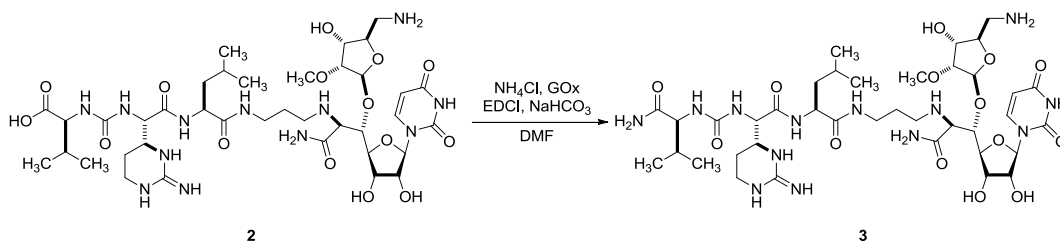

To a stirred solution of **2** (1.9 mg, 2.04  $\mu\text{mol}$ ),  $\text{NH}_4\text{Cl}$  (5.4 mg, 0.10 mmol),  $\text{NaHCO}_3$  (2.6 mg, 0.030 mmol) and GOx (1.4 mg, 0.010 mmol) in DMF (0.2 mL) was added EDCI (1.9 mg, 0.010 mmol). The reaction mixture was stirred for 6 h at rt, filtered and concentrated in vacuo. The crude mixture was purified by C18 reverse-phase HPLC [column: HYPERSIL GOLD™ (175  $\text{\AA}$ , 12  $\mu\text{m}$ , 250 x 10 mm), solvents: a gradient elution of 15 : 85 to 25 : 75 MeOH : 0.1% TFA in  $\text{H}_2\text{O}$  over 20 min, flow rate: 2.0 mL/min, UV: 254 nm] to afford **3** (1.40 mg, 1.51  $\mu\text{mol}$ , 75%, retention time: 18 min):  $^1\text{H}$  NMR (500 MHz,  $\text{CD}_3\text{OD}$ )  $\delta$  7.70 (d,  $J = 8.0$  Hz, 1H), 5.77 (d,  $J = 8.0$  Hz, 1H), 5.27 – 5.23 (m, 1H), 4.48 (s, 1H), 4.44 (t,  $J = 4.2$  Hz, 1H), 4.38 (d,  $J = 4.9$  Hz, 1H), 4.37 (d,  $J = 6.3$  Hz, 1H), 4.34 (d,  $J = 6.3$  Hz, 1H), 4.32 (d,  $J = 5.8$  Hz, 1H), 4.31 – 4.28 (m, 2H), 4.26 – 4.22 (m, 2H), 4.21 – 4.19 (m, 1H), 4.19 – 4.16 (m, 2H), 4.09 (dd,  $J = 12.2, 6.1$  Hz, 2H), 3.85 – 3.78 (m, 1H), 3.49 (s, 3H), 3.46 – 3.41 (m, 4H), 2.92 – 2.89 (m, 2H), 2.16 (p,  $J = 7.5, 6.5$  Hz, 2H), 2.10 – 1.99 (m, 2H), 1.91 – 1.81 (m, 2H), 1.67 – 1.57 (m, 2H), 1.02 – 0.85 (m, 12H); HRMS (ESI+)  $m/z$  calcd for  $\text{C}_{38}\text{H}_{66}\text{N}_{13}\text{O}_{14}$  [ $\text{M} + \text{H}$ ] 928.4852, found 928.4864.

HPLC analysis of **3**.

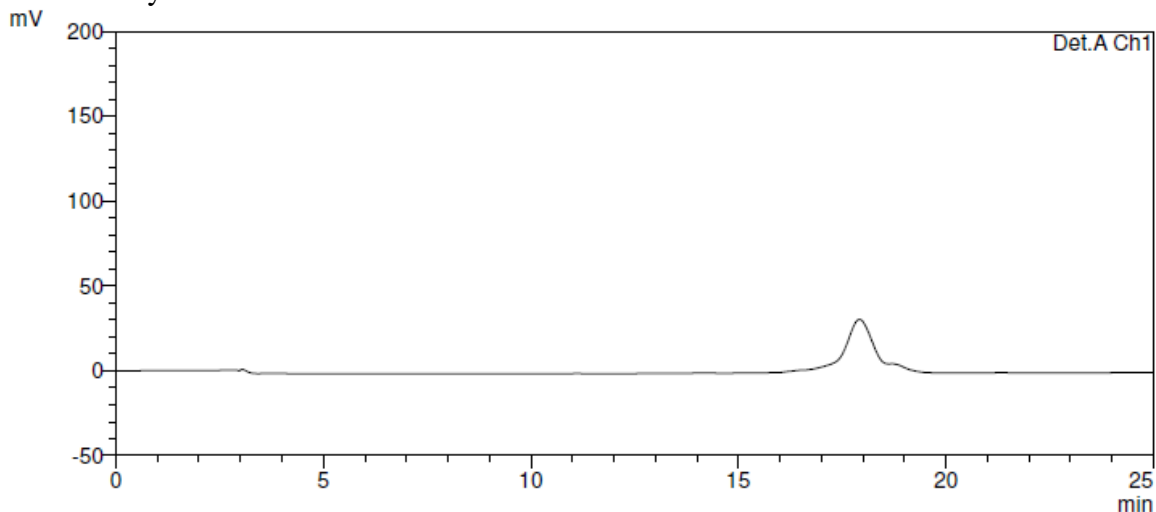

Conditions:

column: Phenomenex Kinetex 1.7  $\mu$  XB-C18 100  $\text{\AA}$  150 x 2.10 mm column, solvents: 25 : 75 MeOH : 0.1% TFA in water, UV: 254 nm

The following experiments were performed to characterize the key intermediates via  $^1\text{H}$ -NMR and  $^{13}\text{C}$ -NMR. **S15**, **S16**, **S17** do not show diastereomers caused by the MTPM group.

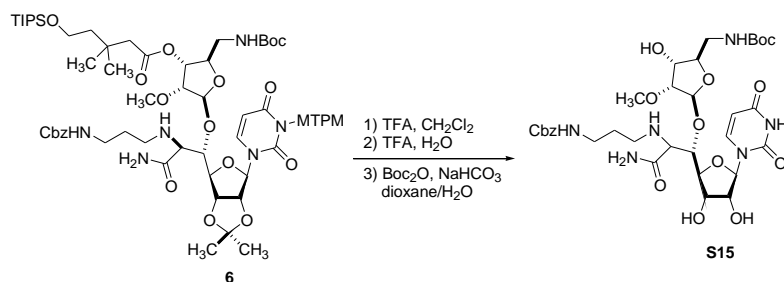

To a stirred solution of **6** (79.3 mg, 0.055 mmol) in CH<sub>2</sub>Cl<sub>2</sub> (0.60 mL) was added TFA (0.40 mL). The reaction mixture was stirred for 3 h at rt, and all volatile were evaporated in vacuo. To a stirred solution of the crude mixture in H<sub>2</sub>O (0.6 mL) was added TFA (0.4 mL). The reaction mixture was stirred for 3 h at rt, and all volatile were evaporated in vacuo. To a stirred solution of the crude mixture and NaHCO<sub>3</sub> (23.1 mg, 0.27 mmol) in dioxane/H<sub>2</sub>O (5:1, 1.2 mL) was added Boc<sub>2</sub>O (60.0 mg, 0.27 mmol). The reaction mixture was stirred for 2 h at rt, filtered and concentrated in vacuo. The crude product was purified by silica gel column chromatography (CHCl<sub>3</sub>/MeOH 95:5 to 90:10 to 80:20) to afford **S15** (32.6 mg, 0.043 mmol, 79%): TLC (CHCl<sub>3</sub>/MeOH 70:30) *R<sub>f</sub>* = 0.30; [α]<sub>D</sub><sup>21</sup> +0.137 (*c* = 0.53, MeOH); IR (thin film)  $\nu_{\max}$  = 3336 (br), 2934, 1690, 1525, 1455, 1366, 1253, 1167 cm<sup>-1</sup>; <sup>1</sup>H NMR (500 MHz, CD<sub>3</sub>OD)  $\delta$  7.90 (d, *J* = 8.1 Hz, 1H), 7.39 – 7.32 (m, 5H), 7.31 – 7.26 (m, 1H), 5.81 (d, *J* = 2.7 Hz, 1H), 5.77 (d, *J* = 8.1 Hz, 1H), 5.16 (d, *J* = 2.7 Hz, 1H), 5.07 (s, 2H), 4.21 – 4.13 (m, 3H), 4.08 (t, *J* = 5.0 Hz, 1H), 4.06 – 4.01 (m, 1H), 3.93 (q, *J* = 5.2 Hz, 1H), 3.68 – 3.60 (m, 1H), 3.43 (d, *J* = 5.9 Hz, 2H), 3.40 (s, 3H), 3.35 (d, *J* = 0.9 Hz, 1H), 3.28 (d, *J* = 5.6 Hz, 1H), 3.21 (td, *J* = 6.7, 2.8 Hz, 2H), 2.64 (hept, *J* = 6.1, 5.1 Hz, 2H), 1.69 (p, *J* = 6.8 Hz, 2H), 1.44 (s, 9H); <sup>13</sup>C NMR (101 MHz, CD<sub>3</sub>OD)  $\delta$  142.36, 129.46 (2C), 128.93, 128.79 (2C), 108.22, 102.74, 91.85, 85.90, 85.28, 84.48, 81.23, 80.36, 75.39, 71.95, 71.32, 67.38, 65.09, 58.56, 46.58, 43.84, 39.73, 31.08, 28.87 (3C); HRMS (ESI+) *m/z* calcd for C<sub>33</sub>H<sub>49</sub>N<sub>6</sub>O<sub>14</sub> [M + H] 753.3307, found: 753.3340.

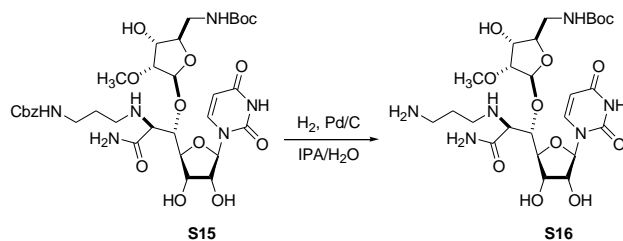

To a stirred solution of **S15** (19.0 mg, 0.025 mmol) in IPA/H<sub>2</sub>O (9:1, 1.0 mL) was added Pd/C (10wt % 9.5 mg) under N<sub>2</sub> atmosphere. H<sub>2</sub> gas was introduced and the reaction mixture was stirred for 2 h under H<sub>2</sub>. The solution was filtered through Celite and concentrated in vacuo. The crude mixture was use for the next reaction without purification.

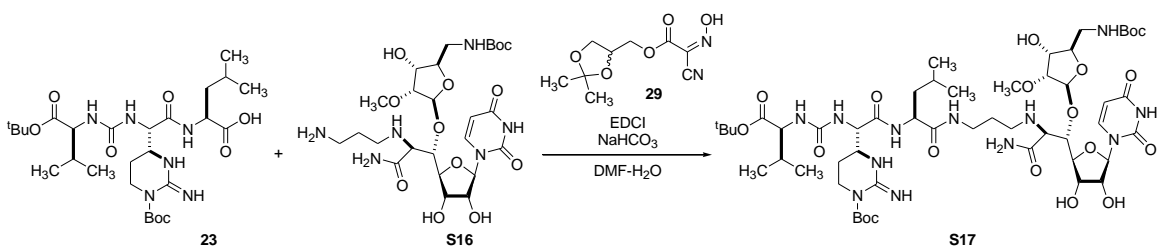

To a stirred solution of **S16** (3.7 mg, 0.006 mmol), **23** (14.7 mg, 0.025 mmol), NaHCO<sub>3</sub> (10.6 mg, 0.13 mmol) and **29** (5.8 mg, 0.025 mmol) in DMF/H<sub>2</sub>O (25:1, 0.4 mL) was added EDCI (14.5 mg, 0.076 mmol). The reaction mixture was stirred for 4 h at rt, filtered and concentrated in vacuo. The crude mixture was purified by C18 reverse-phase HPLC [column: HYPERSIL GOLD™ (175 Å, 12 μm, 250 x 10 mm), solvents: elution of 70 : 30 MeOH : 0.05M NH<sub>4</sub>HCO<sub>3</sub> in H<sub>2</sub>O, flow rate: 2.0 mL/min, UV: 254 nm] to afford **S17** (4.8 mg, 0.004 mmol, 68%, retention time: 17 min): <sup>1</sup>H NMR (500 MHz, CD<sub>3</sub>OD) δ 7.93 (d, *J* = 8.1 Hz, 1H), 5.82 (d, *J* = 3.1 Hz, 1H), 5.76 (d, *J* = 8.1 Hz, 1H), 5.15 (d, *J* = 2.3 Hz, 1H), 4.42 (d, *J* = 4.5 Hz, 1H), 4.33 – 4.28 (m, 1H), 4.20 – 4.13 (m, 5H), 4.09 (tt, *J* = 10.1, 5.1 Hz, 5H), 4.01 – 3.92 (m, 1H), 3.83 – 3.74 (m, 1H), 3.67 – 3.62 (m, 1H), 3.46 – 3.44 (m, 4H), 3.41 (s, 3H), 3.19 – 3.15 (m, 2H), 2.36 – 2.28 (m, 1H), 2.18 – 2.08 (m, 2H), 2.02 – 1.95 (m, 2H), 1.72 – 1.65 (m, 1H), 1.65 – 1.57 (m, 2H), 1.48 (s, 9H), 1.47 (s, 9H), 1.44 (s, 9H), 1.00 – 0.88 (m, 12H); HRMS (ESI<sup>+</sup>) *m/z* calcd for C<sub>52</sub>H<sub>89</sub>N<sub>12</sub>O<sub>19</sub> [M + H] 1185.6367, found 1185.6391.

HPLC analysis of **S17**.

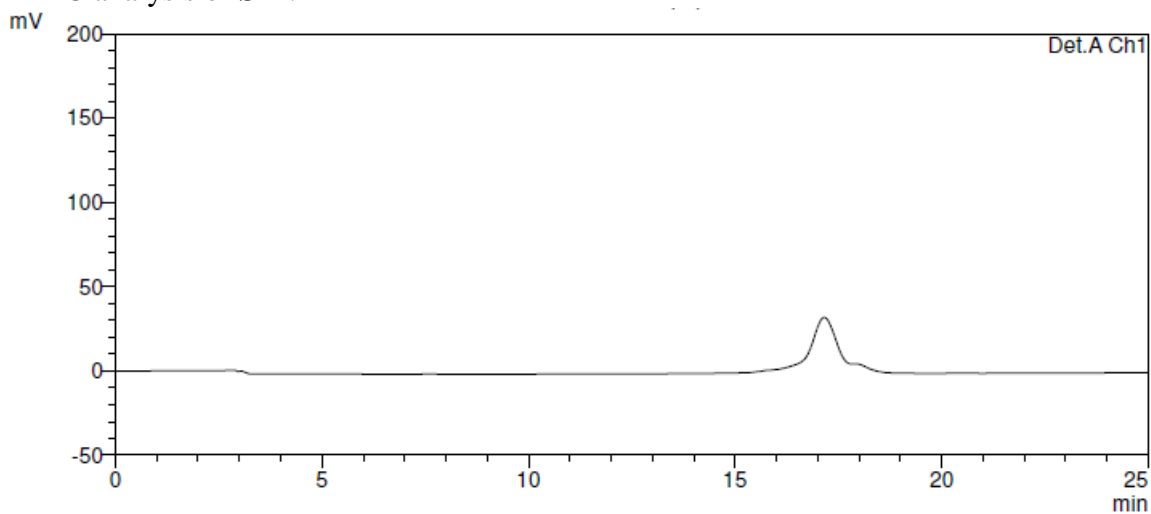

Conditions:

column: Phenomenex Kinetex 1.7 μ XB-C18 100 Å 150 x 2.10 mm column, solvents: 25 : 75 MeOH : 0.1% TFA in water, UV: 254 nm

## Bacterial strains and growth of bacteria

*Mycobacterium tuberculosis* (H<sub>37</sub>Rv) was obtained through BEI Resources, National Institute of Allergy and Infectious Diseases (NIAID), National Institutes of Health (NIH). *Mycobacterium smegmatis* (ATCC 607), *Klebsiella pneumoniae* (ATCC 8047), *Pseudomonas aeruginosa* (ATCC 27853), *Acinetobacter baumannii* (ATCC 19606), *Staphylococcus aureus* (ATCC 6538D-5), *Clostridium difficile* (ATCC 700057), *Enterococcus faecium* (ATCC 349) and *E. coli* (ATCC 29425) were obtained from



American Type Culture Collection (ATCC). A single colony of *Mycobacterium* was obtained on Difco Middlebrook 7H10 nutrient agar enriched with 10% oleic acid, albumin, dextrose, and catalase (OADC) for *M. tuberculosis* by incubating for 15 days, and with albumin, dextrose, and catalase (ADC) for *M. smegmatis* by incubating for 48 h at 37°C in a static incubator. Seed cultures and larger cultures were obtained using Middlebrook 7H9 broth enriched with OADC (for *M. tuberculosis*) by incubating for 15 days and ADC (for *M. smegmatis*) by incubating for 48h at 37°C in a shaking incubator (200rpm). Single colonies of *P. aeruginosa*, *K. pneumoniae*, *A. baumannii*, *S.aureus*, *E. faecium* and *E. coli* were grown on tryptic soy agar for 24 h at 37°C in a static incubator and cultured in tryptic soy broth until log phase to be an optical density (OD) of 0.4-0.5. The OD was monitored at 600 nm using a 96-well microplate reader. A single colony of *C. difficile* was obtained on ATCC medium:

2107 Modified reinforced clostridial agar (pre-reduced), and liquid cultures were obtained in ATCC medium: 2107 Modified reinforced clostridial broth (pre-reduced) under anaerobic conditions.

### **Preparation of membrane fraction P-60 containing MurX/MraY and WecA**

*M. tuberculosis* cells were harvested by centrifugation (4700 rpm) at 4 °C followed by washing with 0.9% saline solution (thrice), and approximately 5 g of pellet (wet weight) was collected. The washed cell pellets were suspended in homogenization buffer (containing 50 mM MOPS [pH = 8.0], 0.25 M sucrose, 10 mM MgCl<sub>2</sub>, and 5 mM 2-mercaptoethanol) and disrupted by probe sonication on ice (10 cycles of 60 s on and 90 s off). The resulting suspension was centrifuged at 1,000 xg for 10 min at 4 °C to remove unbroken cells. The supernatant was centrifuged at 25,000 xg for 40 min at 4 °C (3 or 4 times). All pellets in each tube were pooled, and a second sonication was performed (10 cycles of 60 s on and 90 s off). The lysate was centrifuged once at 25,000 xg for 1 h, and the supernatant was subjected to ultracentrifugation at 60,000 xg for 1 h at 4 °C. The supernatant was discarded, and the membrane fraction containing MurX enzyme (P-60) was suspended in the Tris-HCl buffer (pH = 7.5) containing 2-mercaptoethanol. Total protein concentrations were approximately 8 to 10 mg/mL. Aliquots were stored in Eppendorf tubes at -80 °C. Similarly, the membrane fractions containing MraY and WecA enzyme (P-60) were prepared from *M. smegmatis* and *E. coli*, respectively.

### **MurX/MraY assay**

MurX/MraY assay substrates, Park's nucleotide-*N*<sup>6</sup>-C6-dansyl, neryl phosphate, were chemically synthesized according to the reported procedures.<sup>3</sup>

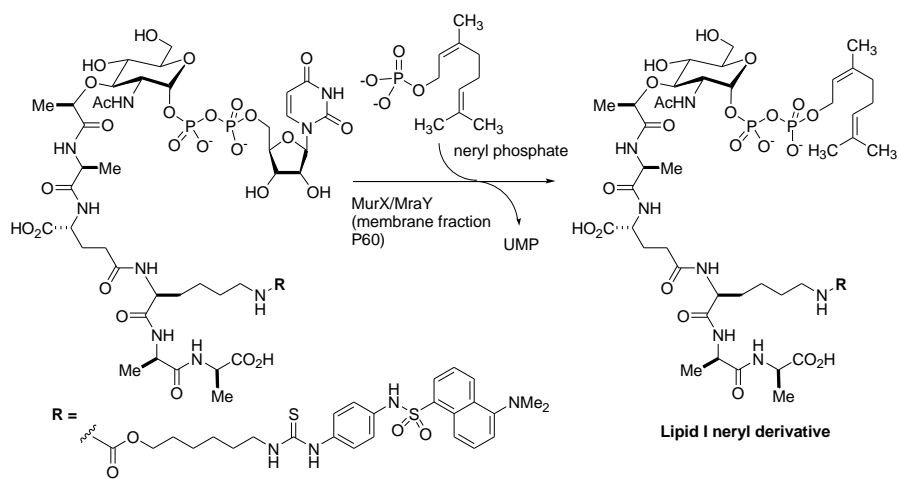

Park's nucleotide-  $N^6$ -C6-dansyl (2 mM stock solution, 3.75  $\mu$ L [75  $\mu$ M]),  $MgCl_2$  (0.5 M, 10  $\mu$ L [50mM]), KCl (2 M, 10  $\mu$ L [200mM]), Triton X-100 (0.5%, 11.25  $\mu$ L), Tris buffer (pH 8.0, 50 mM, 2.5  $\mu$ L), neryl phosphate (6, 10 mM, 45  $\mu$ L), and inhibitor (0 - 100  $\mu$ M, in DMSO, [2.5  $\mu$ L]) were placed in a 500  $\mu$ L Eppendorf tube. To a stirred reaction mixture, P-60 (15  $\mu$ L) was added (total volume of reaction mixture: 100  $\mu$ L). The reaction mixture was incubated for 1 h at room temperature (26  $^{\circ}C$ ) and quenched with  $CHCl_3$  (200  $\mu$ L). Two phases were mixed via vortex and centrifuged at 25,000  $xg$  for 10 min. The upper aqueous phase was assayed via reverse-phase HPLC. The water phase (10  $\mu$ L) was injected into HPLC (solvent:  $CH_3CN/0.05$  M aq.  $NH_4HCO_3 = 25:75$ ; UV: 350 nm; flow rate: 0.5 mL/min; column: Kinetex 5  $\mu$ m C8, 100 A, 150 x 4.60 mm), and the area of the peak for lipid I-neryl derivative was quantified to obtain the  $IC_{50}$  value. The  $IC_{50}$  values were calculated from plots of the percentage product inhibition versus the inhibitor concentration.

## WecA assay

WecA assay substrate, UDP-Glucosamine-C6-FITC was chemically synthesized according to the reported procedures.<sup>4</sup>

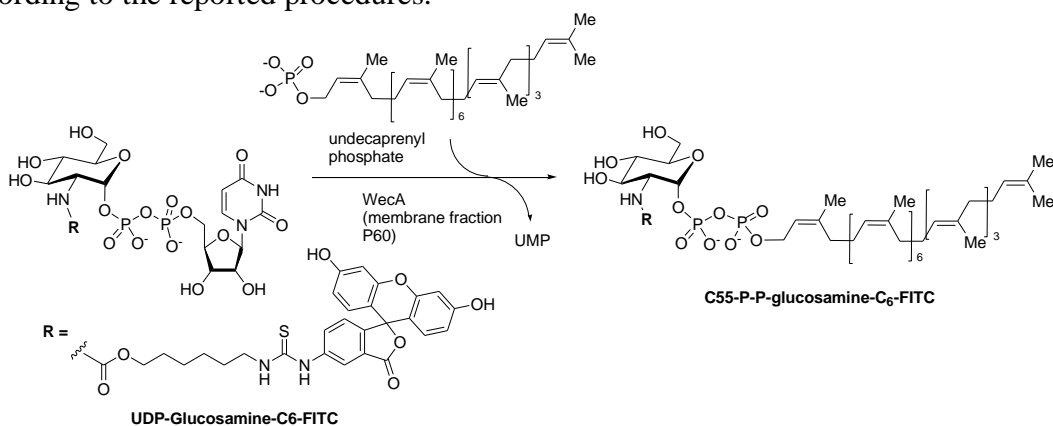

UDP-Glucosamine-C6-FITC (2 mM stock solution, 0.56  $\mu$ L),  $MgCl_2$  (0.5 M, 4  $\mu$ L),  $\beta$ -mercaptoethanol (50 mM, 5  $\mu$ L), CHAPS (5%, 11.25  $\mu$ L), Tris buffer (pH 8.0, 50 mM, 6.19  $\mu$ L), undecaprenyl phosphate (4 mM, 2.5  $\mu$ L), and synthesized compounds (10  $\mu$ M,

in DMSO, 0.5  $\mu\text{L}$ ) were placed in a 500  $\mu\text{L}$  Eppendorf tube. To a stirred reaction mixture, P-60 (20  $\mu\text{L}$ ) was added (total volume of reaction mixture: 50  $\mu\text{L}$ ). The reaction mixture was incubated for 2 h at 37  $^{\circ}\text{C}$  and quenched with n-butanol (150  $\mu\text{L}$ ). Two phases were mixed via vortex and centrifuged at 10,000  $\times g$  for 3 min. The upper organic phase was assayed via reverse-phase HPLC. The organic phase (25  $\mu\text{L}$ ) was injected into HPLC (solvent: gradient elution of 85:15 to 95:5 MeOH/0.05 M aq.  $\text{NH}_4\text{HCO}_3$ ; UV: 485 nm; flow rate: 0.5 ml/ min; column: Kinetex 5  $\mu\text{m}$  C8, 100  $\text{\AA}$ , 150 x 4.60 mm), and the area of the peak for C55-P-P-glucosamine-C<sub>6</sub>-FITC was quantified to obtain the  $\text{IC}_{50}$  value. The  $\text{IC}_{50}$  values were calculated from plots of the percentage product inhibition versus the inhibitor concentration.

## MIC assays

Minimum inhibitory concentrations were determined by broth dilution microplate alamar blue assay. All compounds were stored in DMSO (1 mg/100  $\mu\text{L}$ ). This concentration was used as the stock solution for all MIC studies. Each compound (8  $\mu\text{L}$ ) from stock solution was placed in the first well of a sterile 96 well plate and a serial dilution was conducted with the culturing broth (total volume of 100  $\mu\text{L}$ ). The bacterial suspension at log phase (100  $\mu\text{L}$ ) was added to each well (total volume of 200  $\mu\text{L}$ ). *M. tuberculosis* plates were incubated for 15 days at 37  $^{\circ}\text{C}$  in a static incubator. for *M. smegmatis*, *P. aeruginosa*, *K. pneumoniae*, *A. baumannii*, *S. aureus*, *E. faecium*, *C. difficile* and *E. coli* were incubated for 48hrs at 37  $^{\circ}\text{C}$ . 20  $\mu\text{L}$  of resazurin (0.02%) was added to each well and incubated in a shaking incubator (120 rpm) for 4 h for *M. tuberculosis*, 2hrs for *M. smegmatis*, and 1hr for *P. aeruginosa*, *K. pneumoniae*, *A. baumannii*, *S. aureus*, *E. faecium*, *C. difficile* and *E. coli*. The MIC values were determined according to the National Committee for Clinical Laboratory Standards (NCCLS) method (pink = growth, blue = no visible growth). The absorbance of each well was also measured at 570 and 600 nm via a microplate reader.

| Compound                               | growth inhibition [ $\text{MIC}_{50}$ ( $\mu\text{g/mL}$ )] |                     |                      |                      |                     |                  |                   |                     |                |
|----------------------------------------|-------------------------------------------------------------|---------------------|----------------------|----------------------|---------------------|------------------|-------------------|---------------------|----------------|
|                                        | <i>M. tuberculosis</i>                                      | <i>M. smegmatis</i> | <i>P. aeruginosa</i> | <i>K. pneumoniae</i> | <i>A. baumannii</i> | <i>S. aureus</i> | <i>E. faecium</i> | <i>C. difficile</i> | <i>E. coli</i> |
| Muraymycin D <sub>1</sub> (1)          | 1.56                                                        | >100                | >100                 | >100                 | >100                | >100             | >100              | >100                | >100           |
| Muraymycin D <sub>1</sub> -amide (2)   | 1.56                                                        | >100                | >100                 | >100                 | >100                | >100             | >100              | >100                | >100           |
| Muraymycin D <sub>1</sub> -diamide (3) | 6.25                                                        | >100                | >100                 | >100                 | >100                | >100             | >100              | >100                | >100           |
| Tunicamycin                            | 12.5                                                        | -                   | -                    | -                    | -                   | -                | -                 | -                   | -              |
| Capuramycin                            | 6.25                                                        | -                   | -                    | -                    | -                   | -                | -                 | -                   | -              |
| UT-01320 <sup>5</sup>                  | 1.25                                                        | -                   | -                    | -                    | -                   | -                | -                 | -                   | -              |

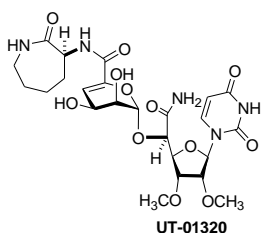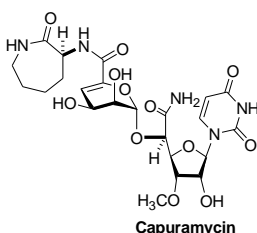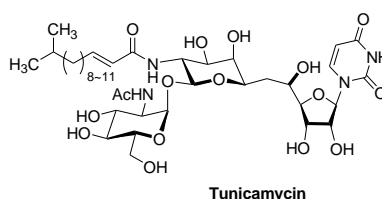

### Determination of cytotoxicity in Vero Cells

Selected molecules were tested for cytotoxicity (IC<sub>50</sub>) in Vero cells via a MTT colorimetric assay. Vero cell line was cultured in Complete eagle's minimum essential growth medium (EMEM) containing L-glutamine, sodium pyruvate, minimum essential amino acids, penicillin-streptomycin and 10% fetal bovine serum. After 72h of exposure of molecules to this cell line at concentrations ranging from 0.4 to 400mg/mL, the culture medium was changed to complete EMEM without phenol red before addition of yellow tetrazolium dye; MTT. Viability was assessed on the basis of cellular conversion of MTT into a purple formazan product. The absorbance of the colored formazan product was measured at 600nm by BioTek Synergy HT Spectrophotometer.

| Compound                               | IC <sub>50</sub> (μg/mL) |
|----------------------------------------|--------------------------|
| Muraymycin D <sub>1</sub> (1)          | >300                     |
| Muraymycin D <sub>1</sub> -amide (2)   | >300                     |
| Muraymycin D <sub>1</sub> -diamide (3) | >300                     |
| Tunicamycin                            | 0.62                     |
| Capuramycin                            | >300                     |
| UT-01320                               | >300                     |

### References

- (1) Aleiwi, B. A.; Schneider, C. M.; Kurosu, M. *J. Org. Chem.* **2012**, *77*, 3859-3867.
- (2) Wang, Y.; Kurosu, M. *Tetrahedron* **2012**, *68*,4797-4803.
- (3) (a) Siricilla, S.; Mitachi, K.; Skorupinska-Tudek, K.; Swiezewska, E.; Kurosu, M. *Anal. Biochem.* **2014**, *461*, 36-45.
- (4) (ref19b in the manuscript) Mitachi, K.; Siricilla, S.; Yang, D.; Kong, Y.; Skorupinska-Tudek, K.; Swiezewska, E.; Kurosu, M. *Anal. Biochem.* **2016**, accepted for publication.
- (5) Siricilla, S.; Mitachi, K.; Wan, B.; Franzblau, S. G.; Kurosu, M. *J. Antibiot.* **2015**, *68*, 271-278.

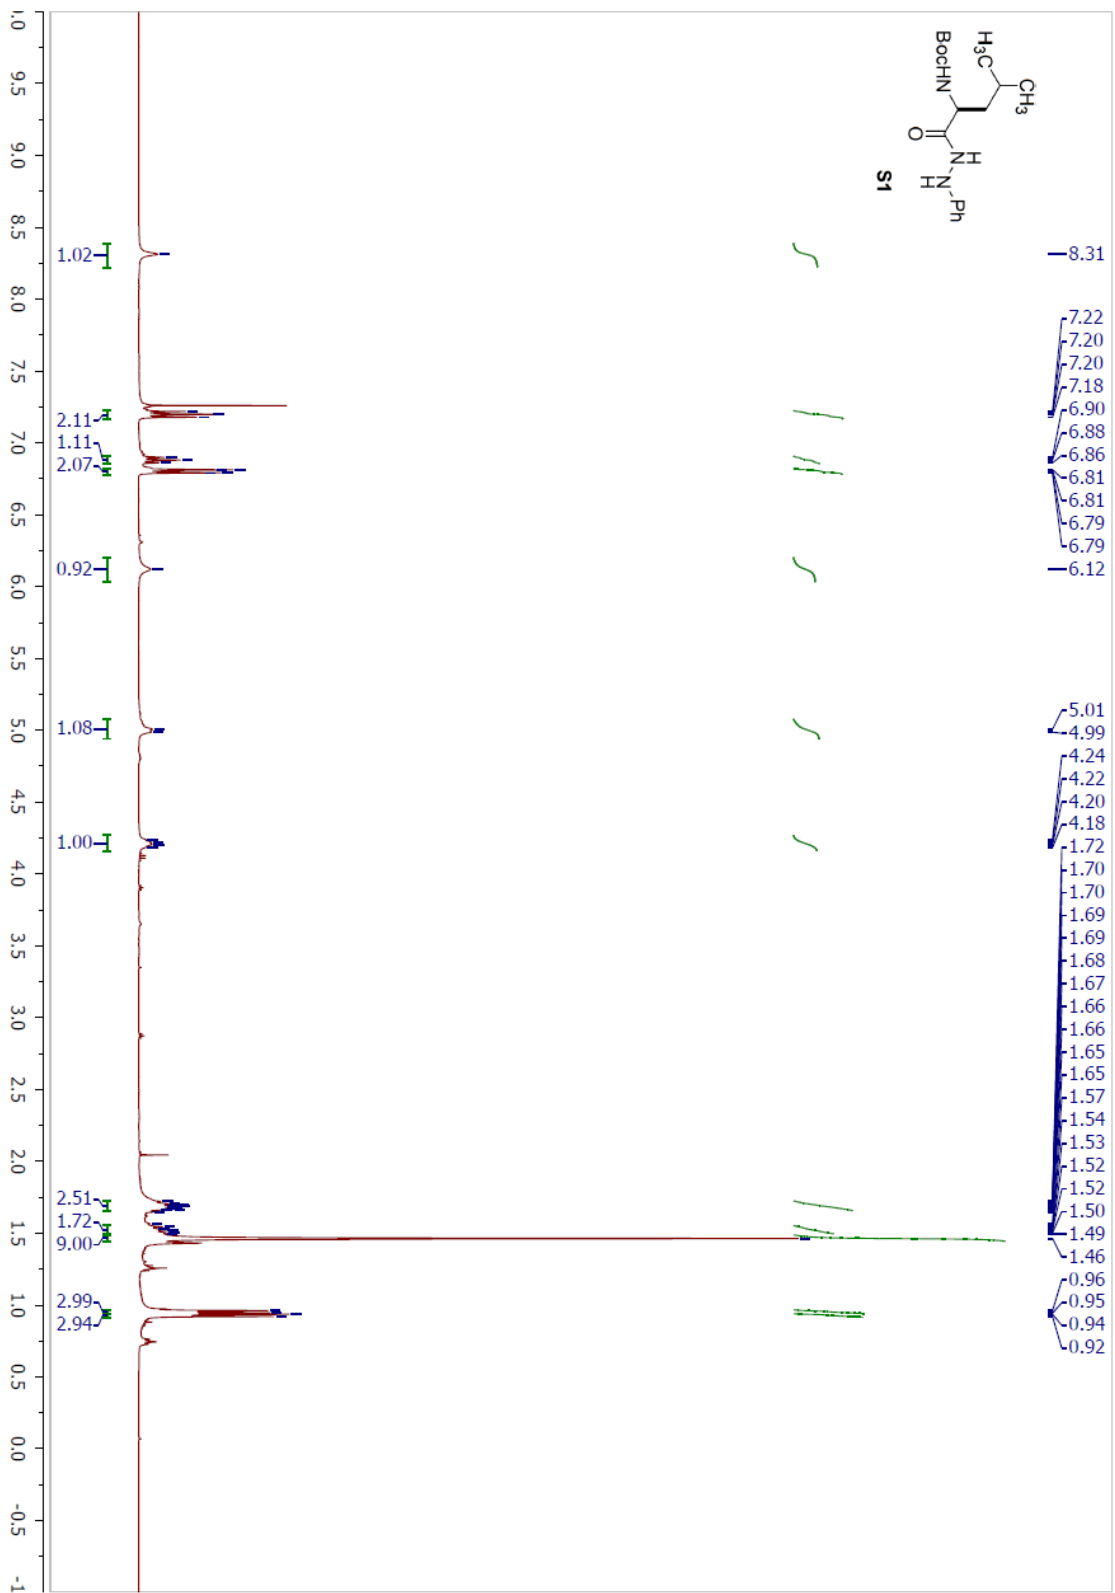

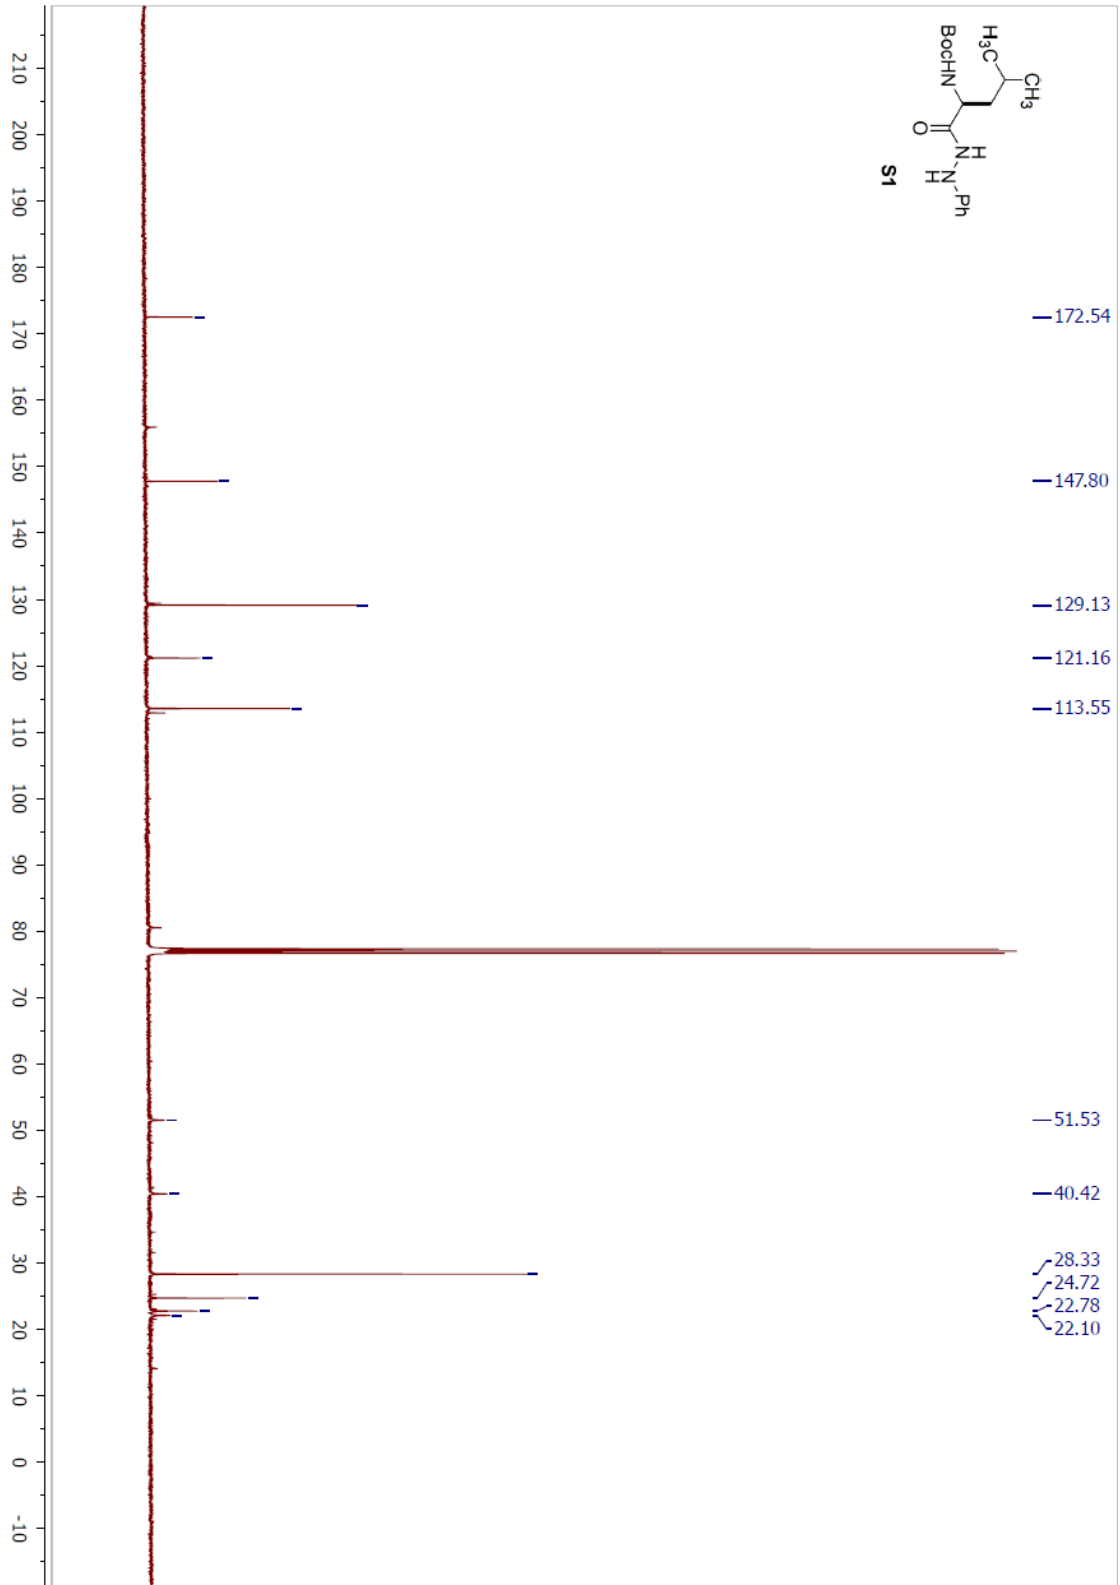

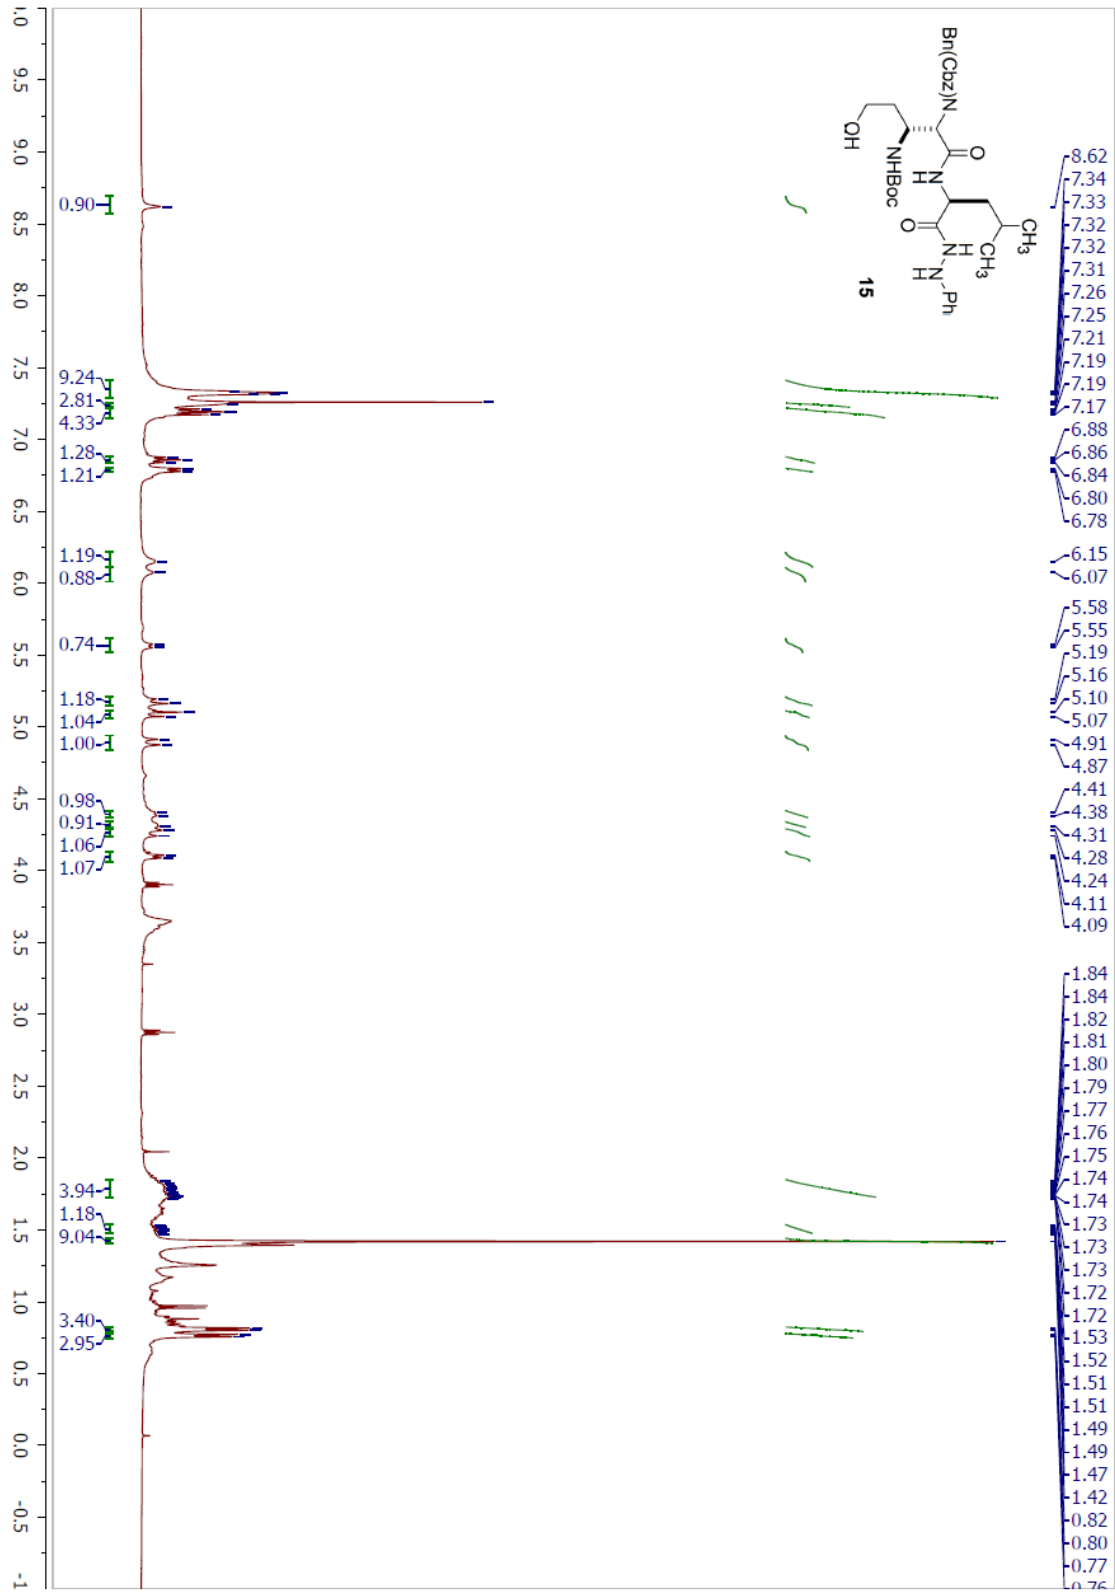

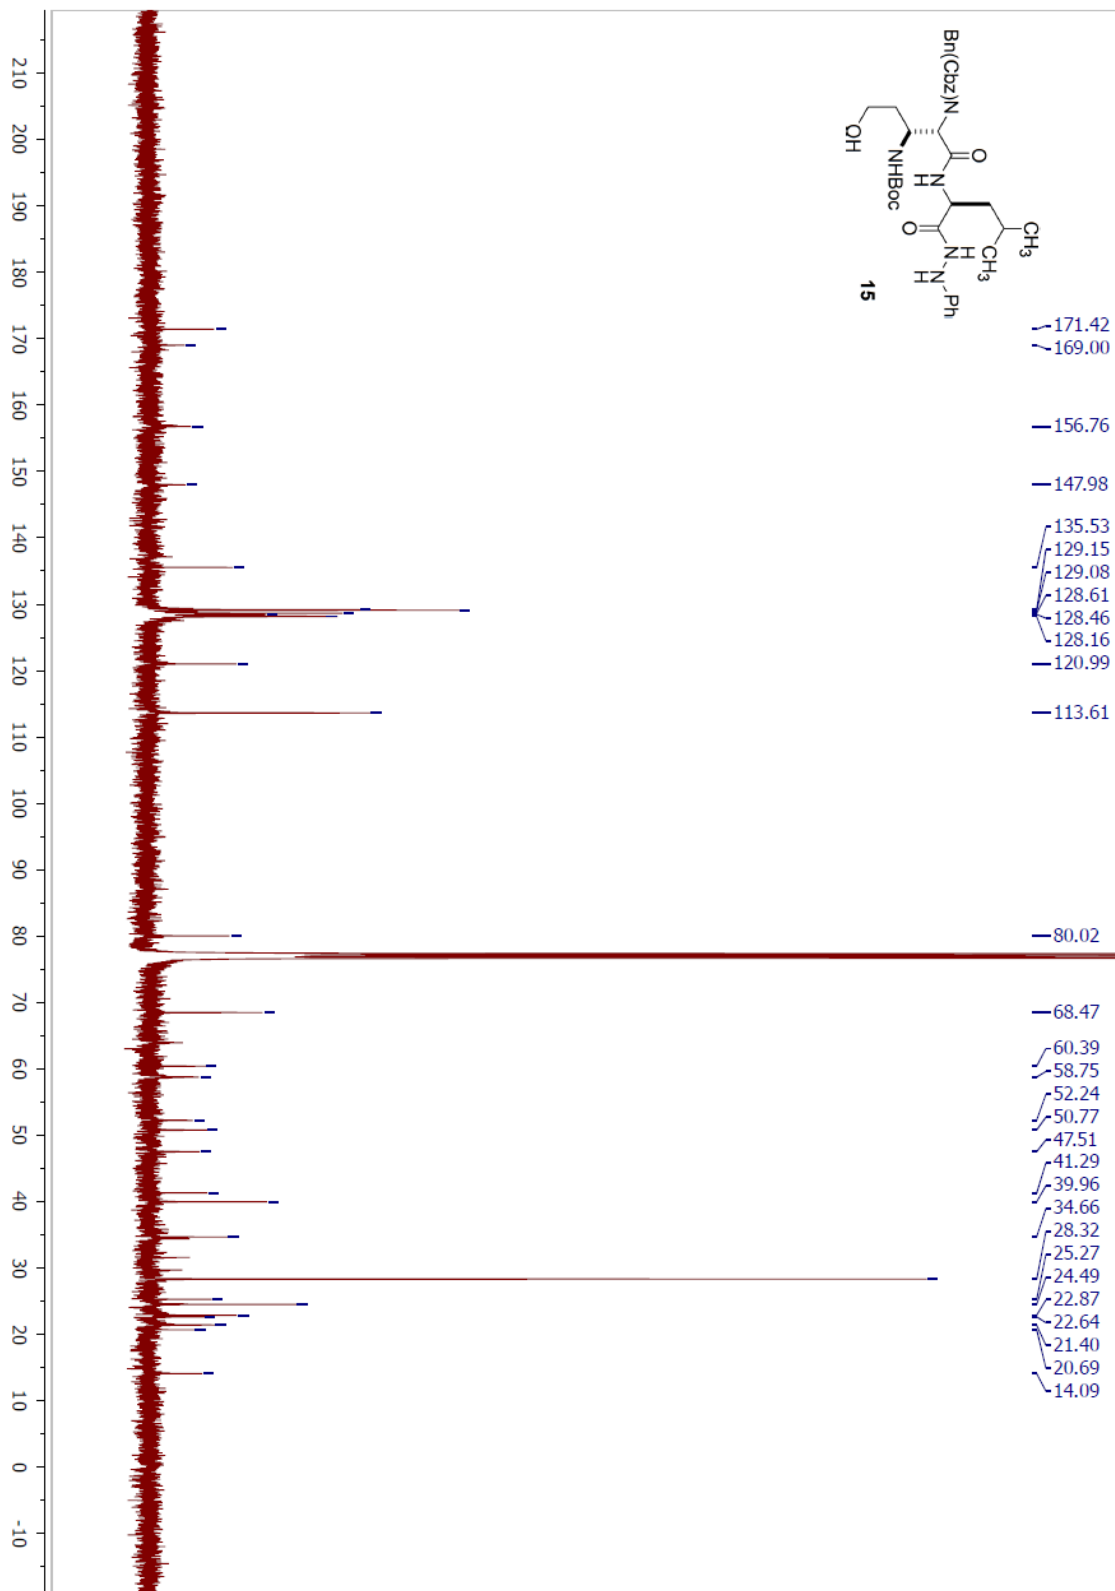



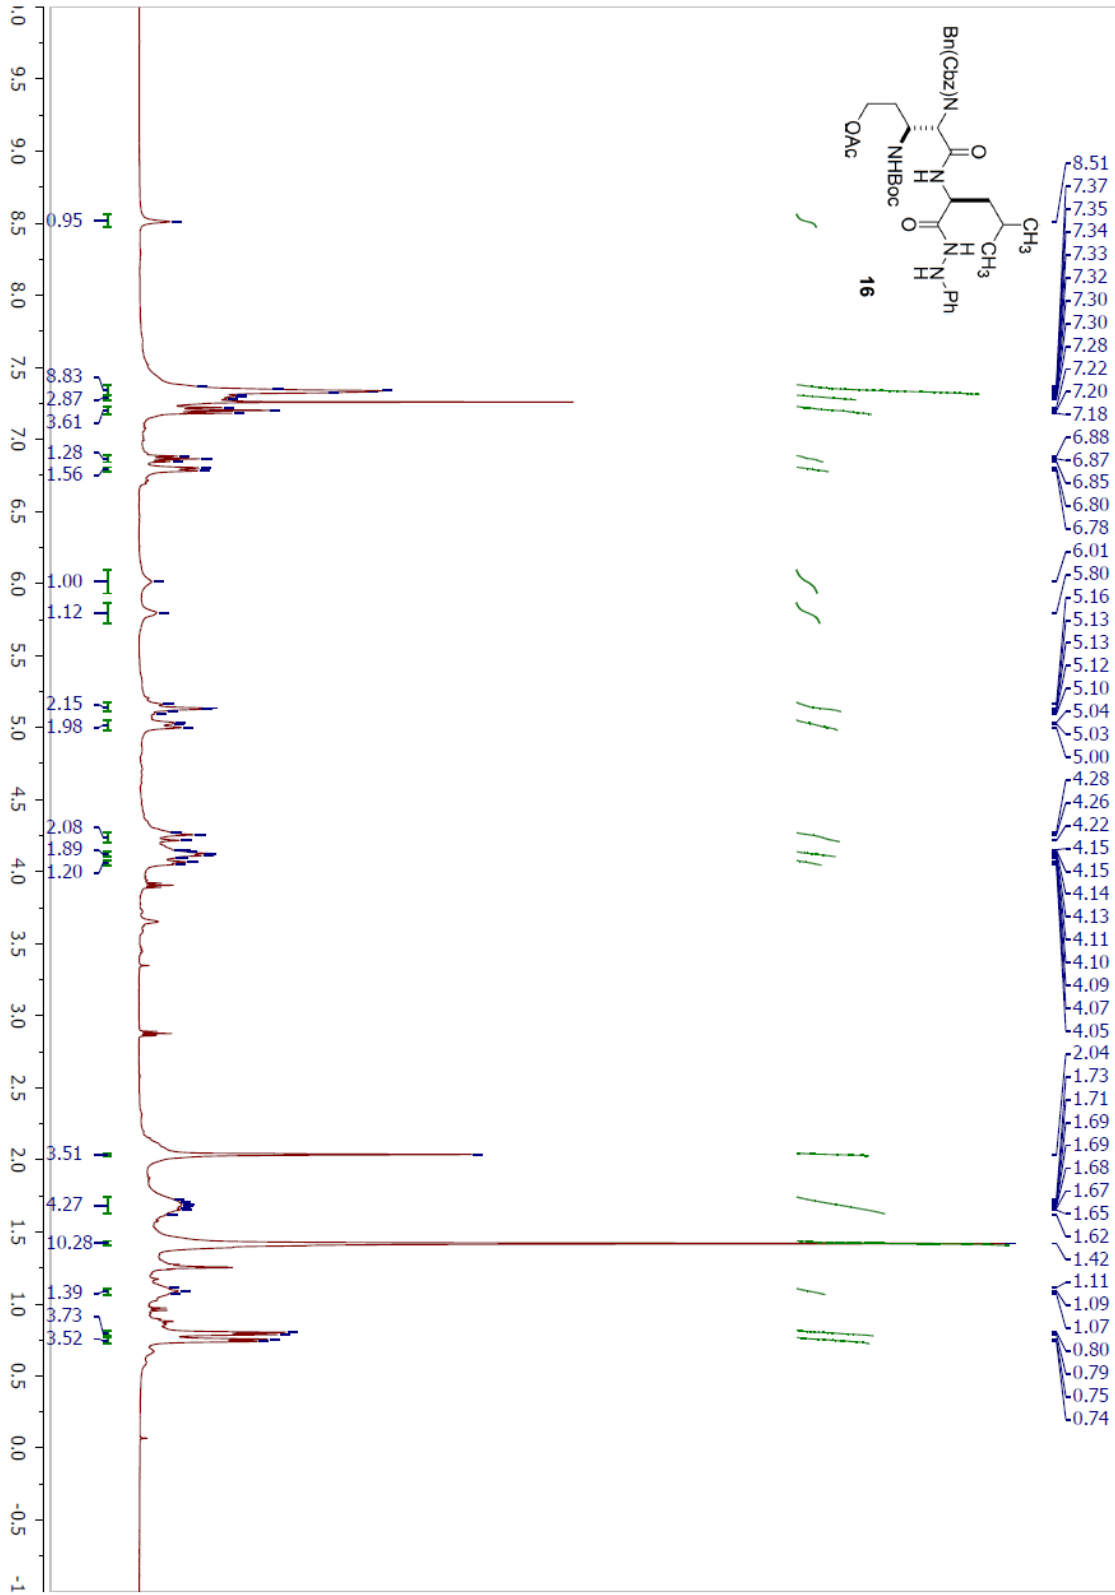

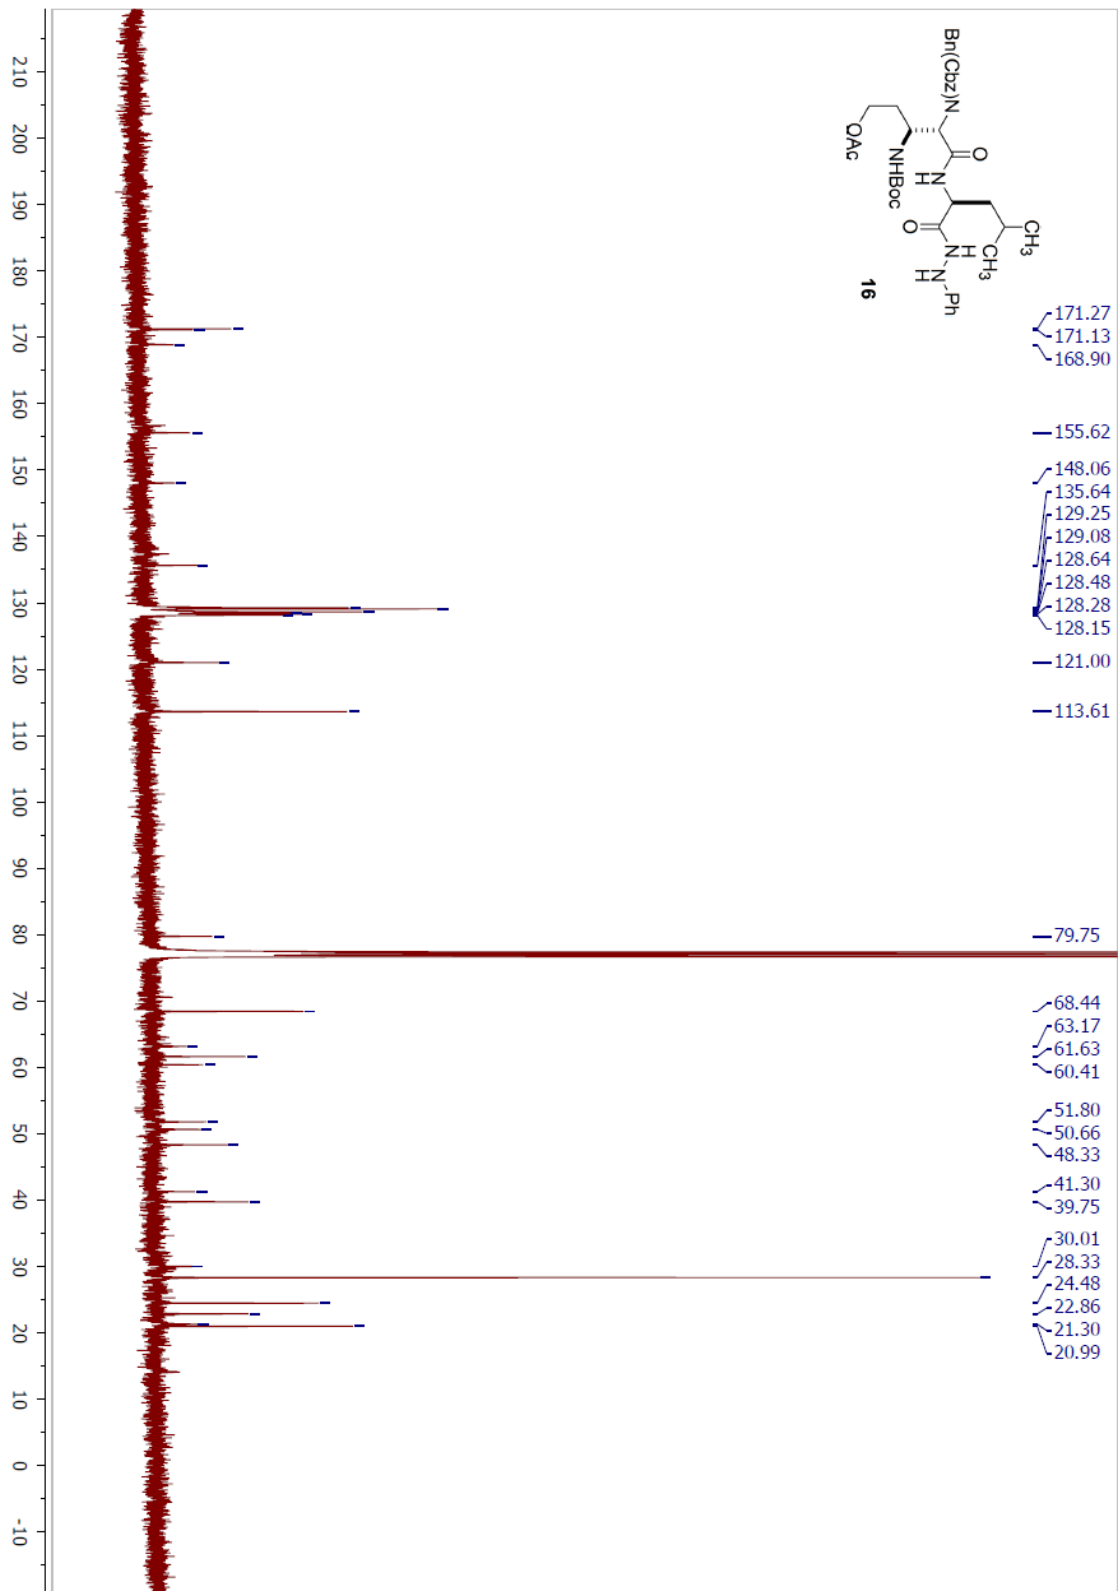

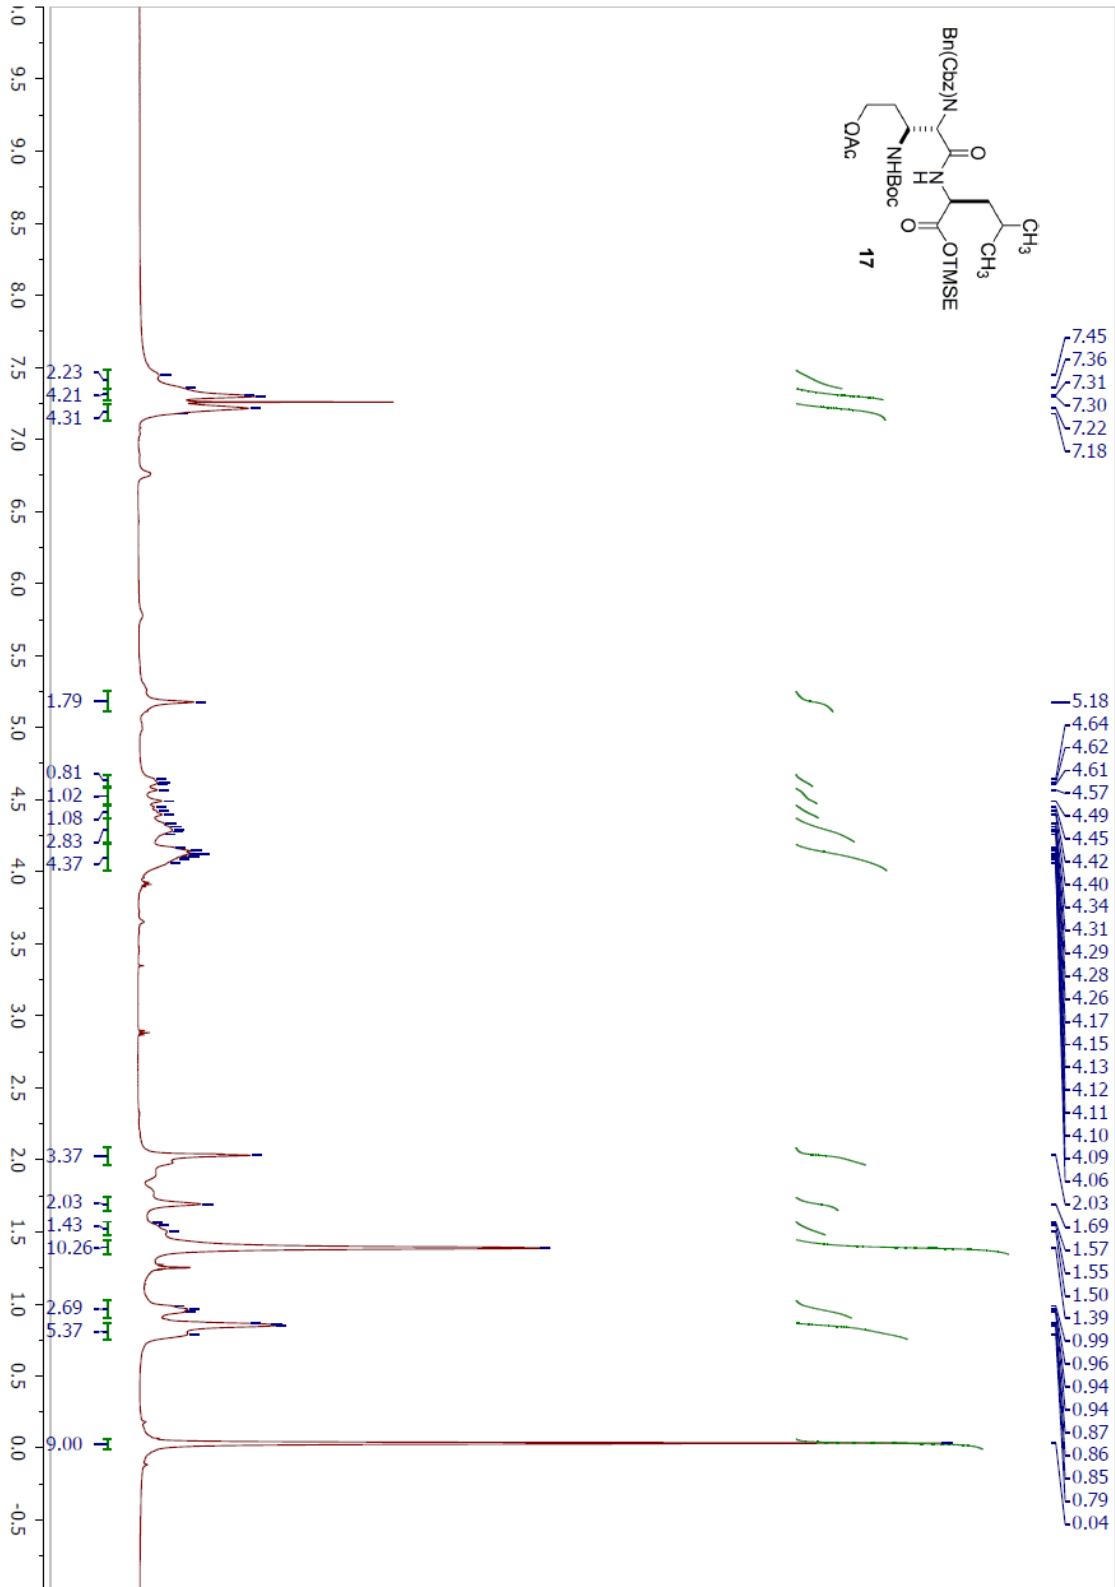

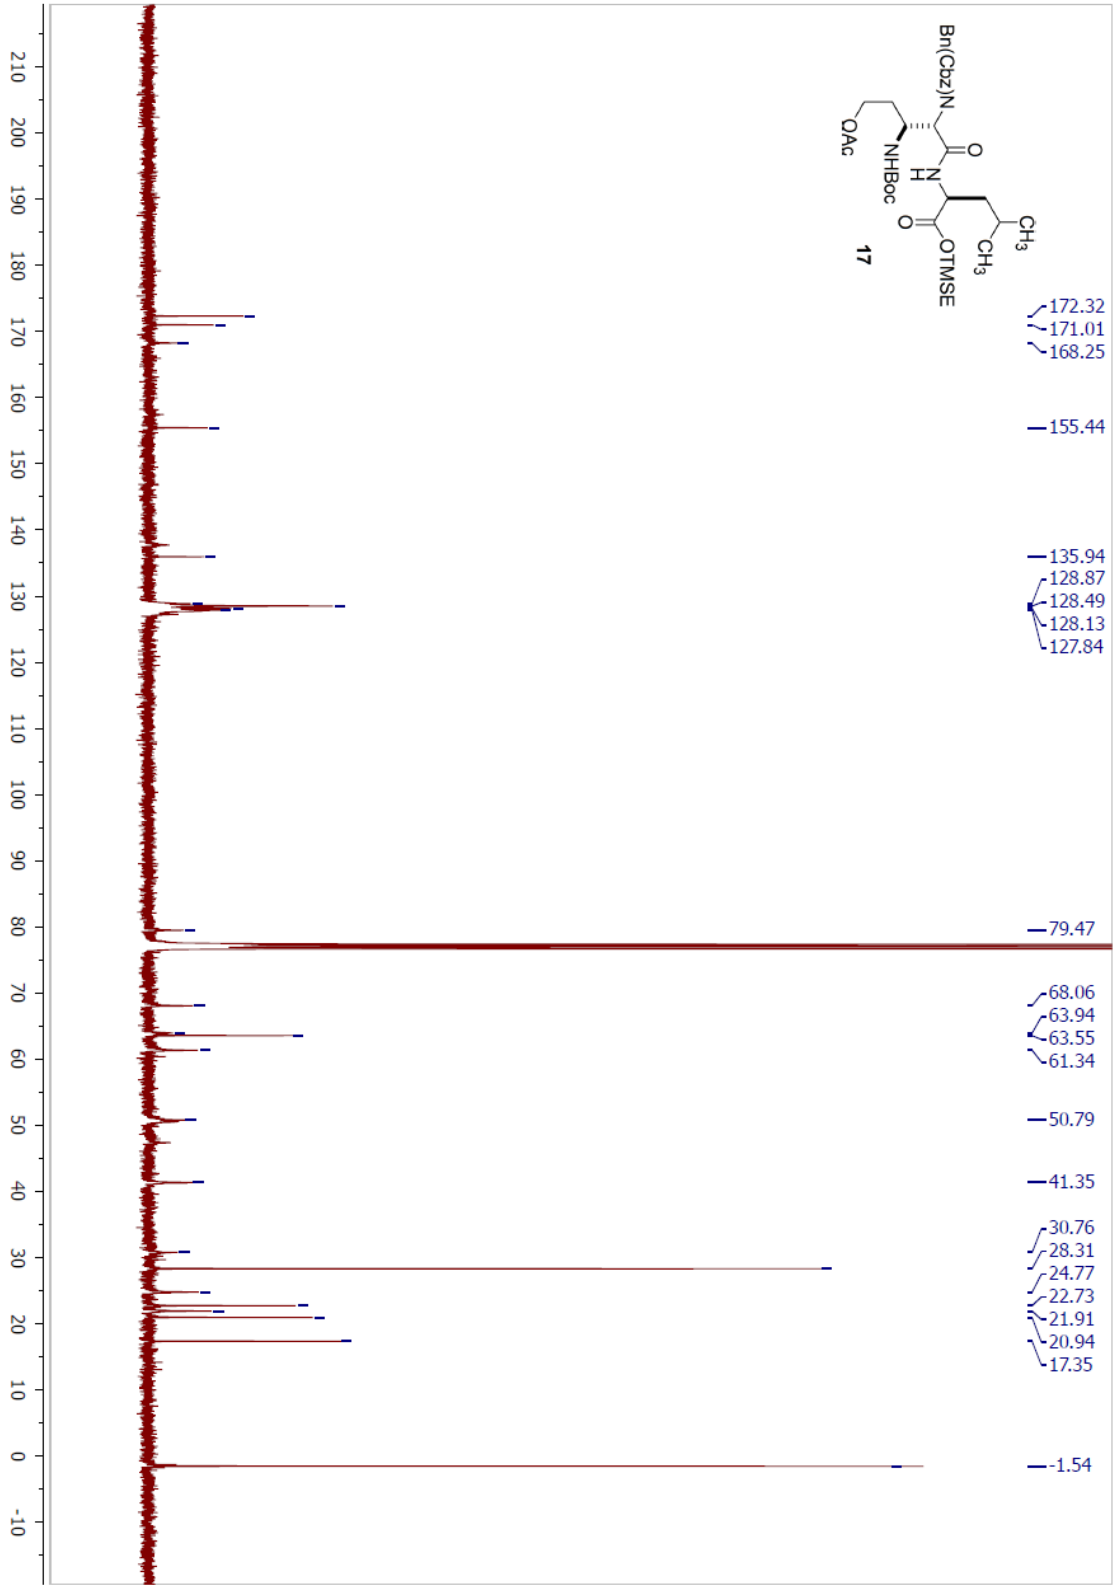



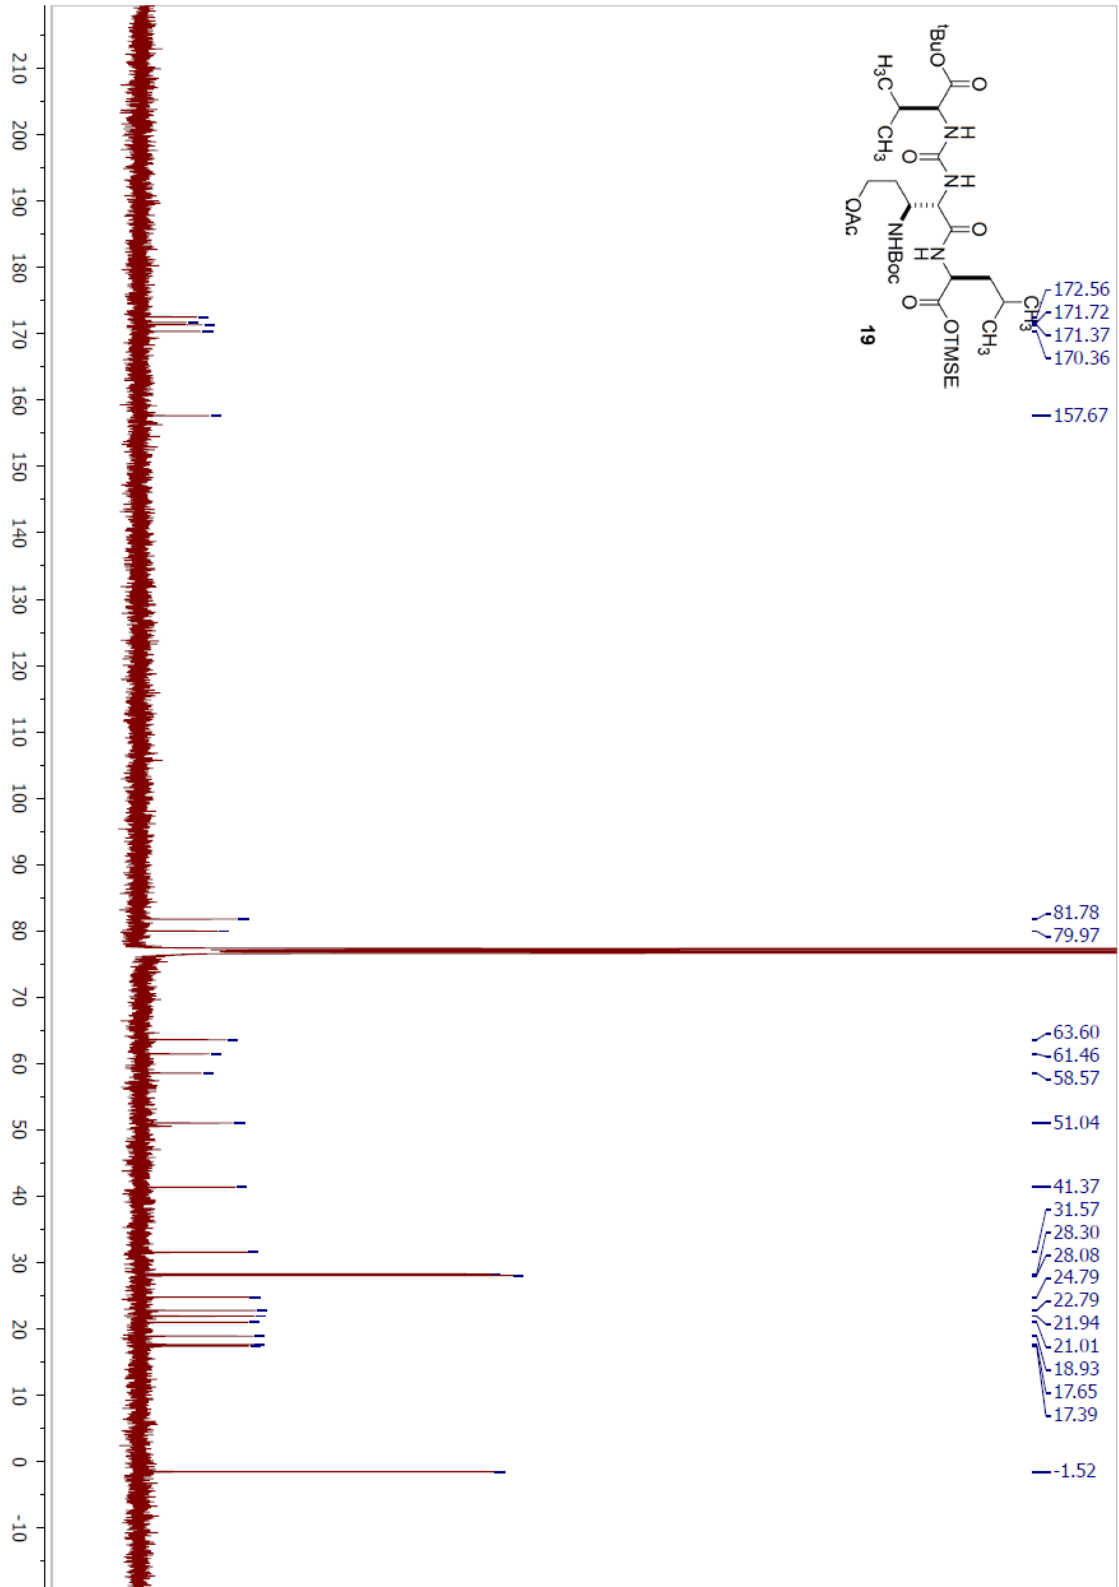

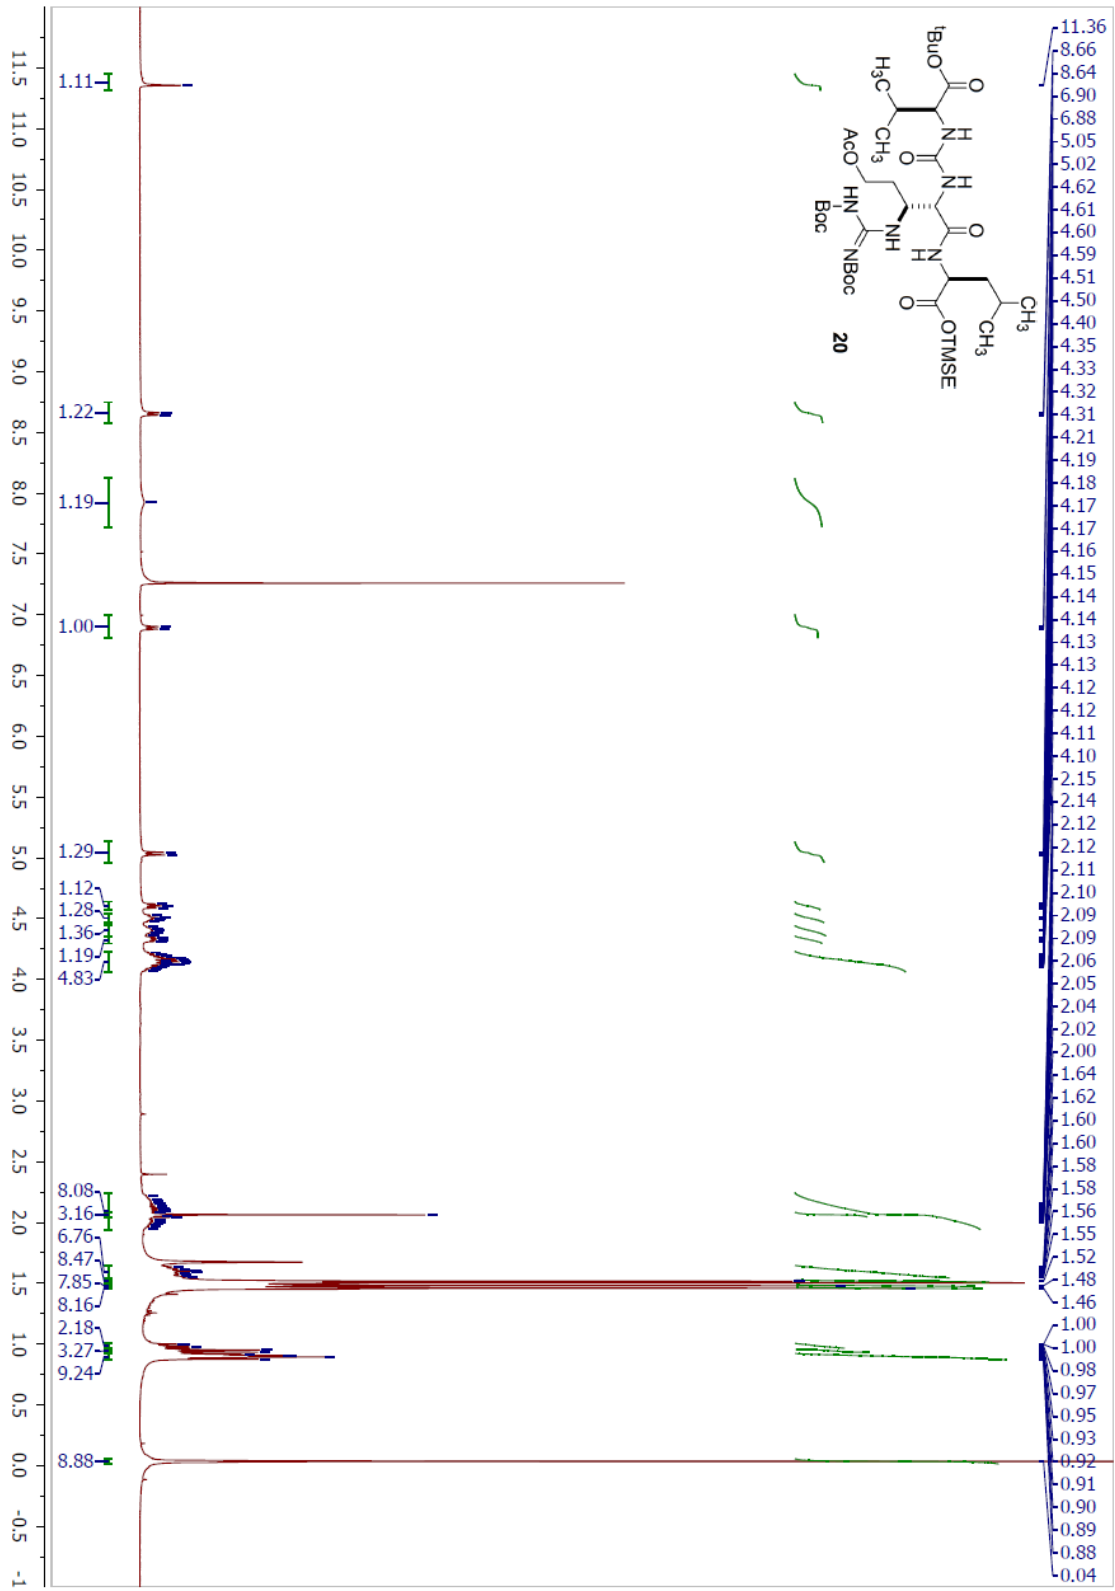

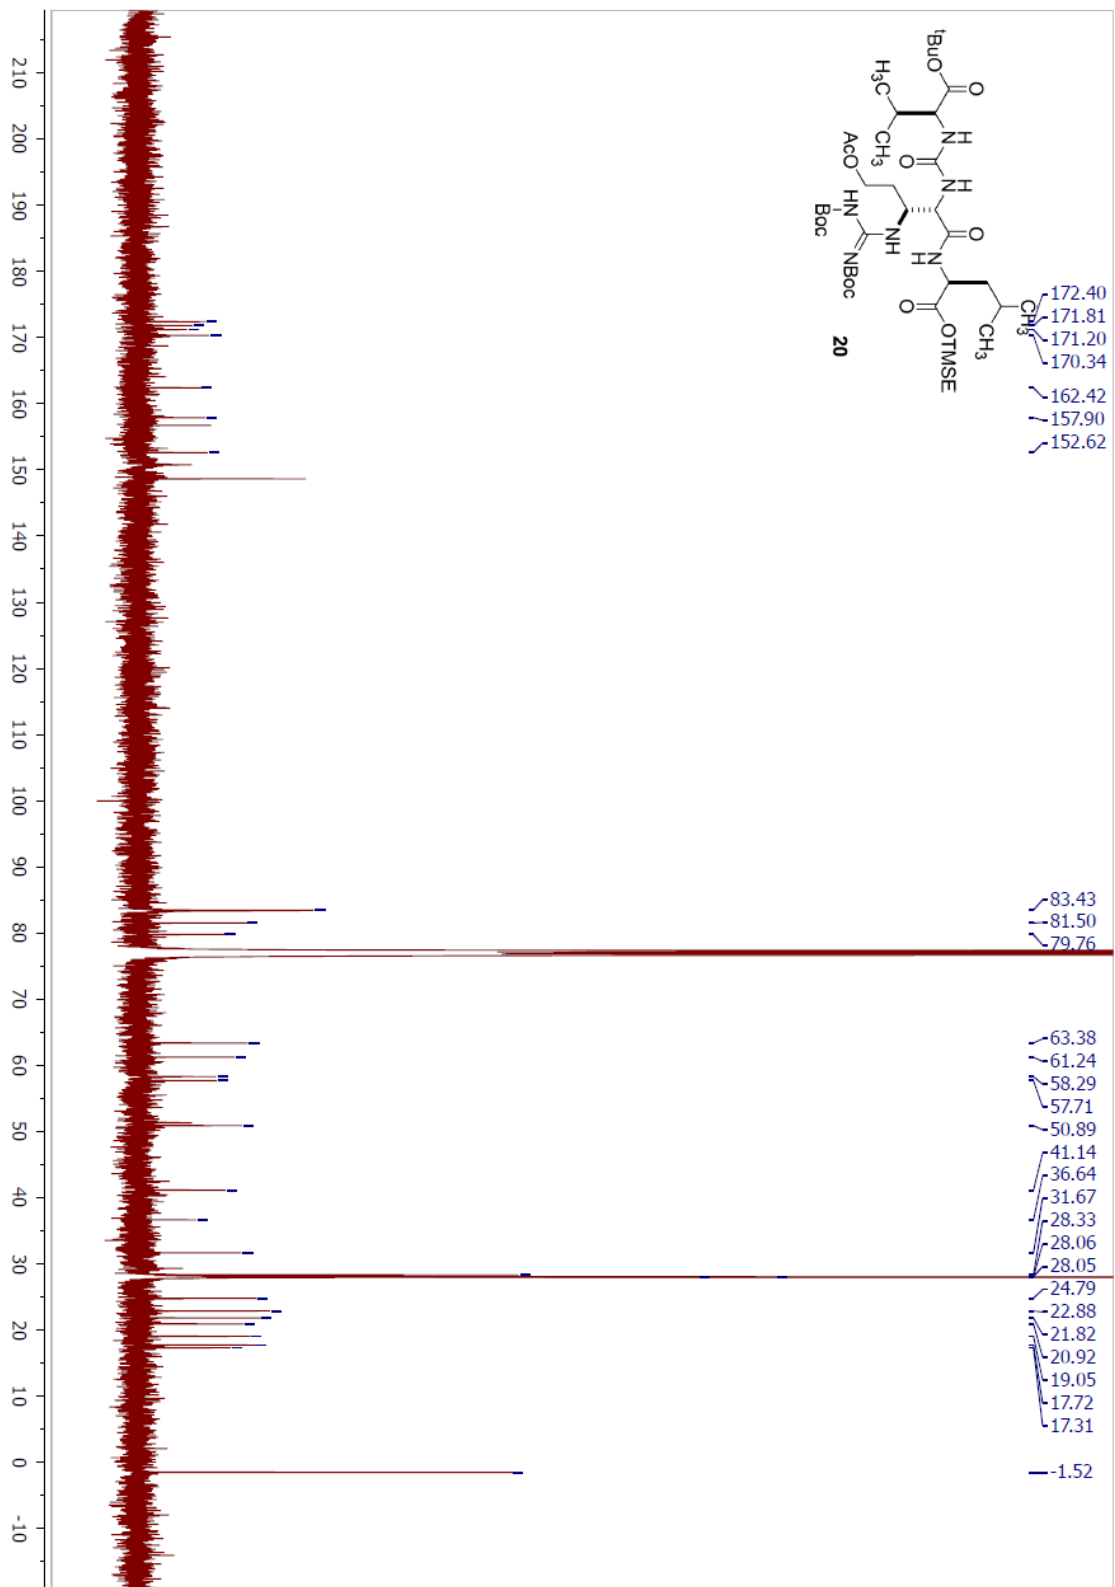





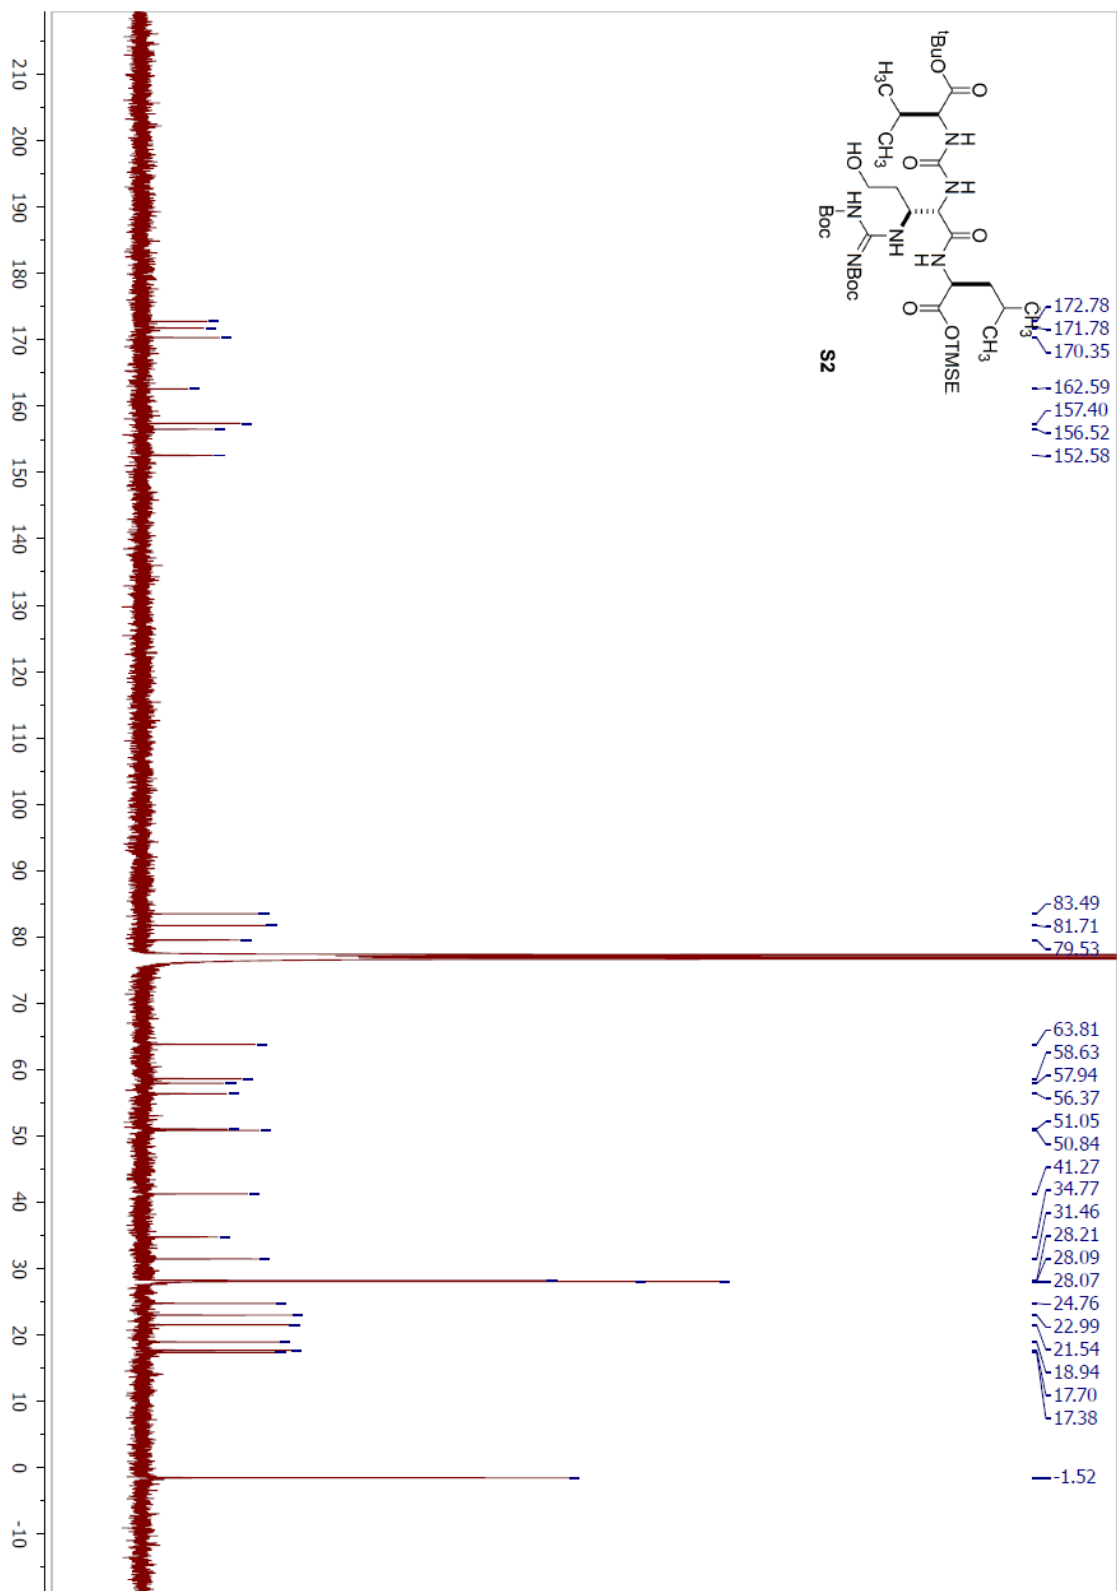

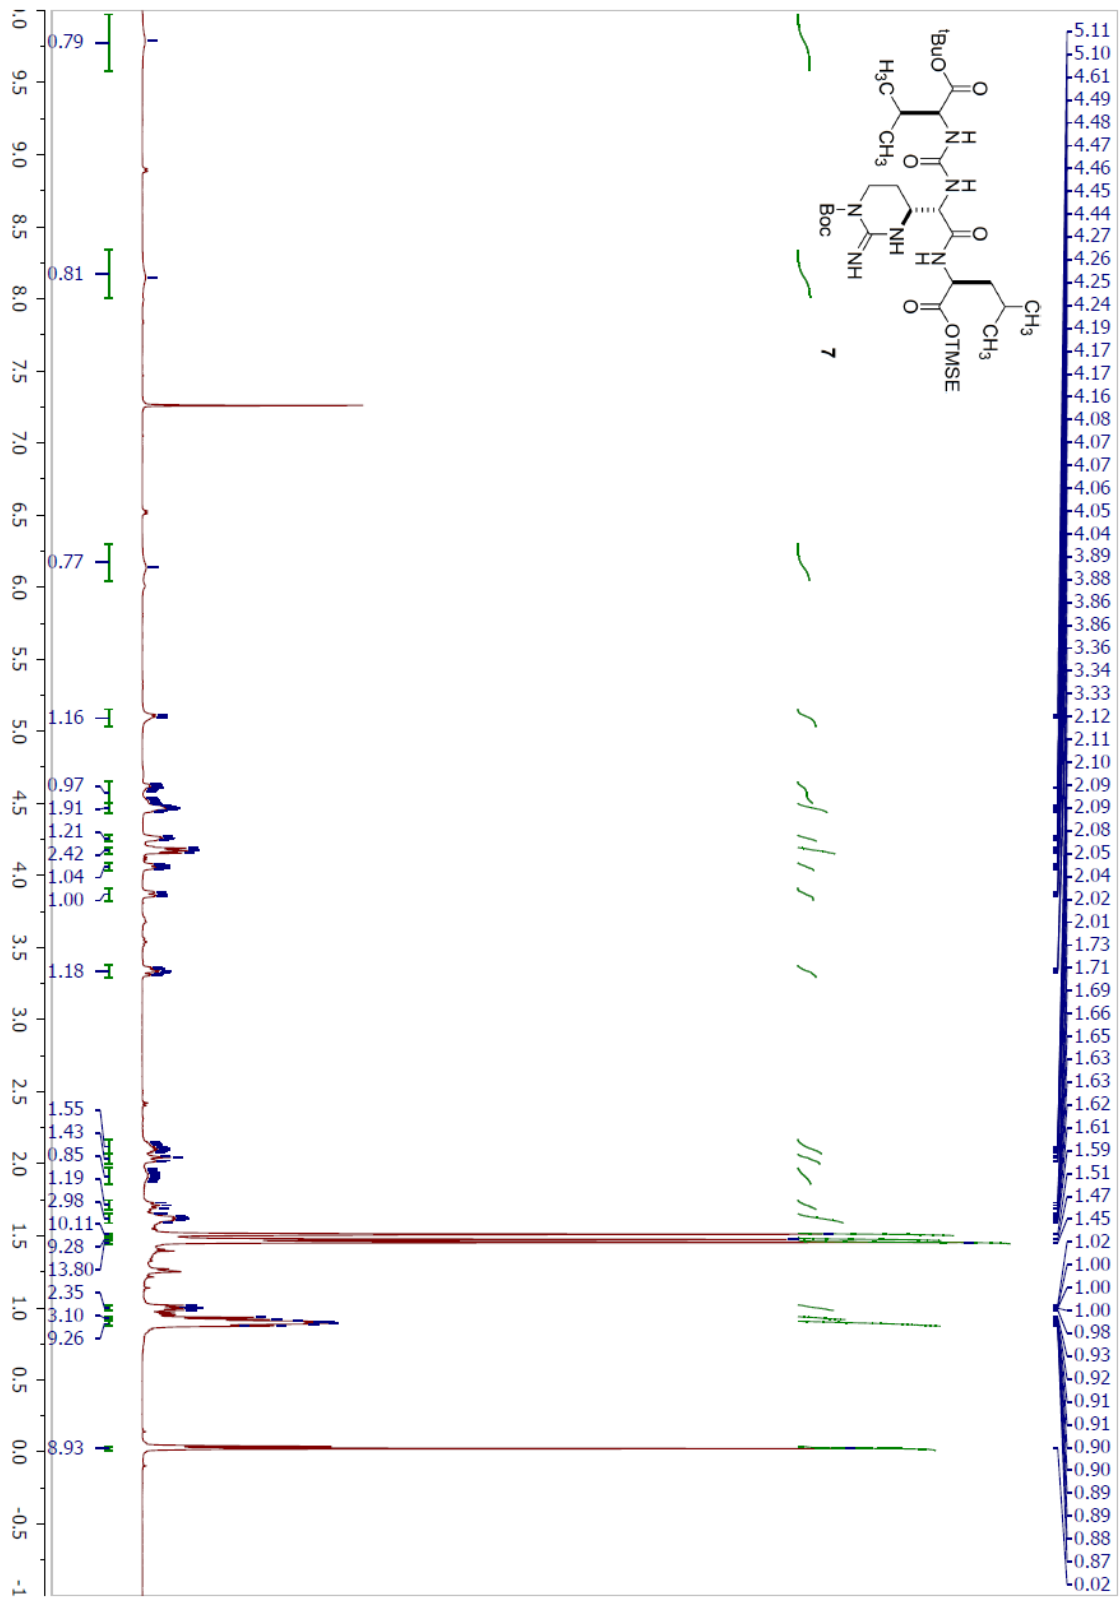

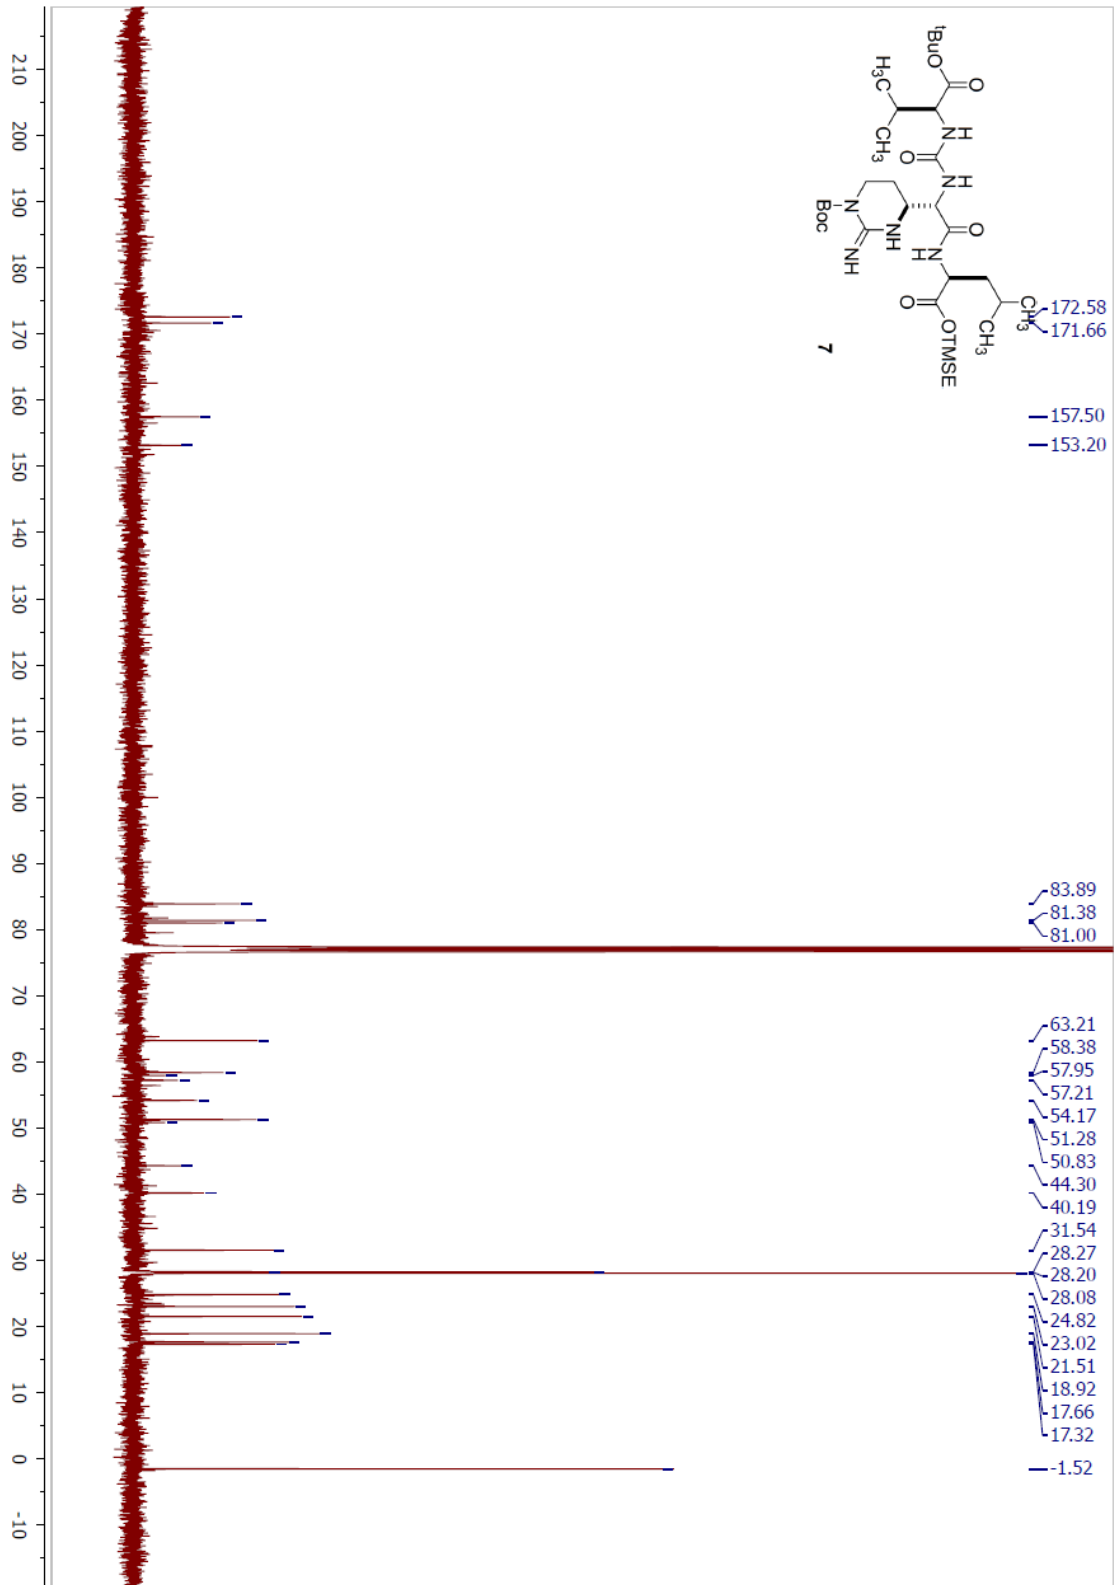



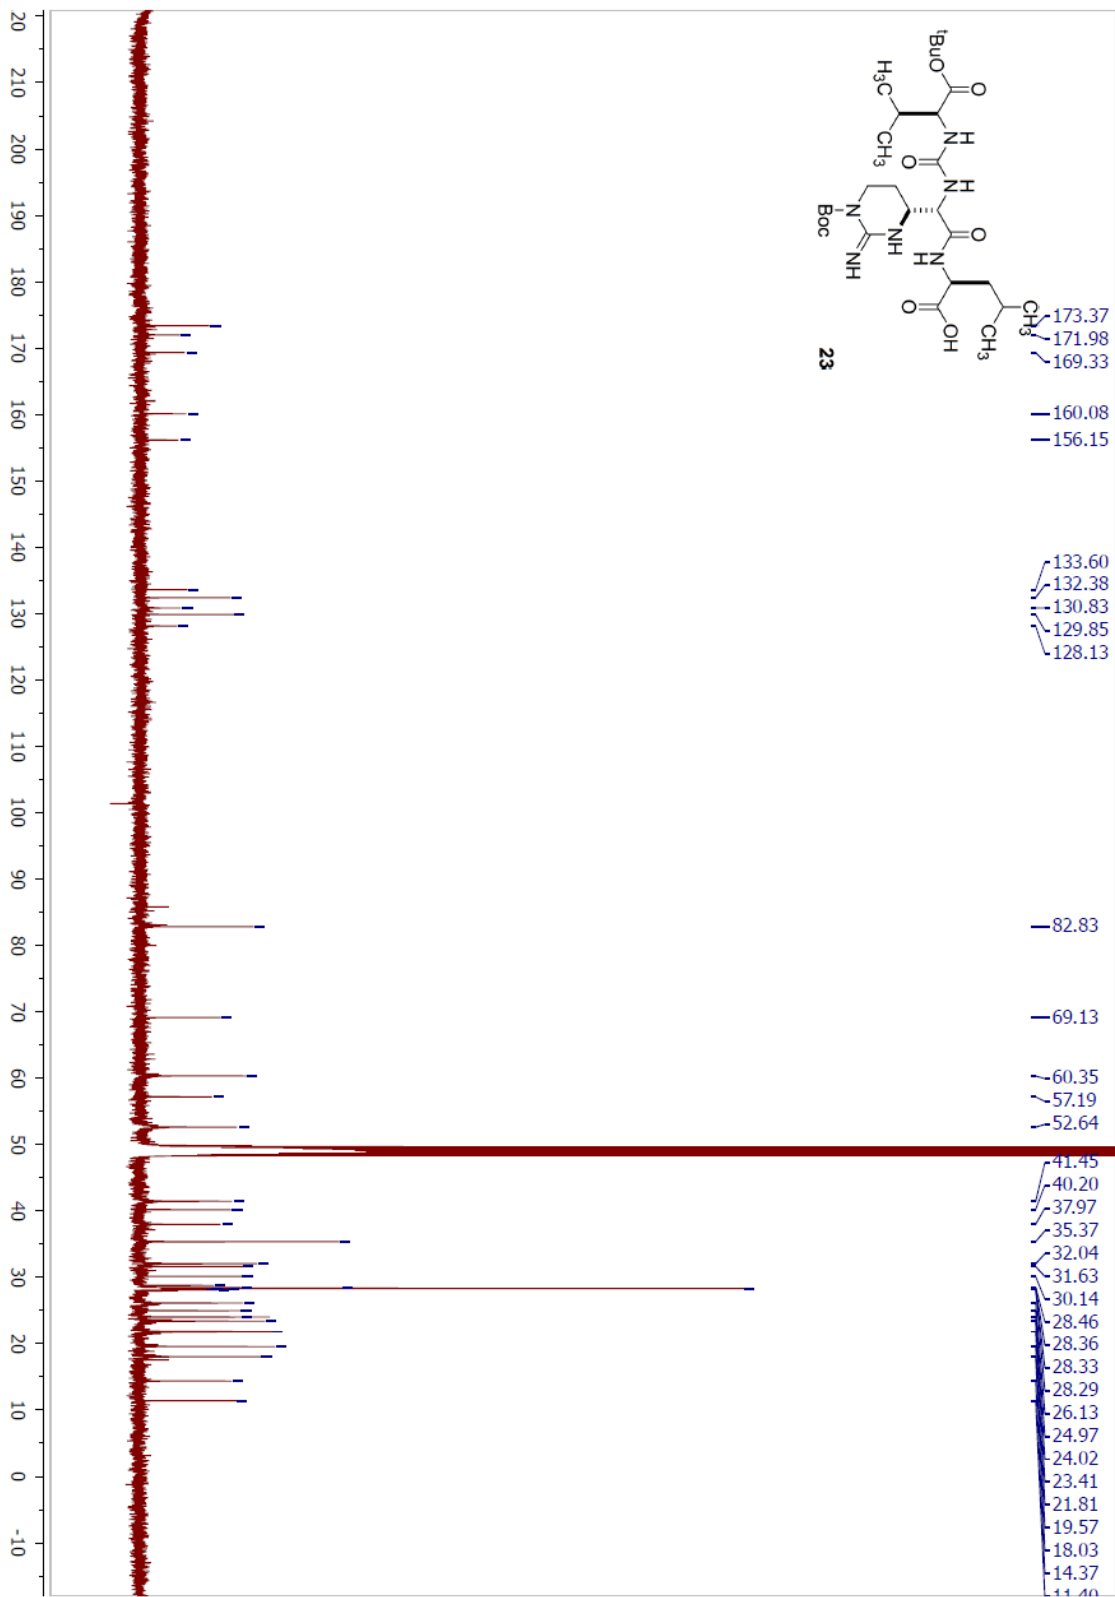

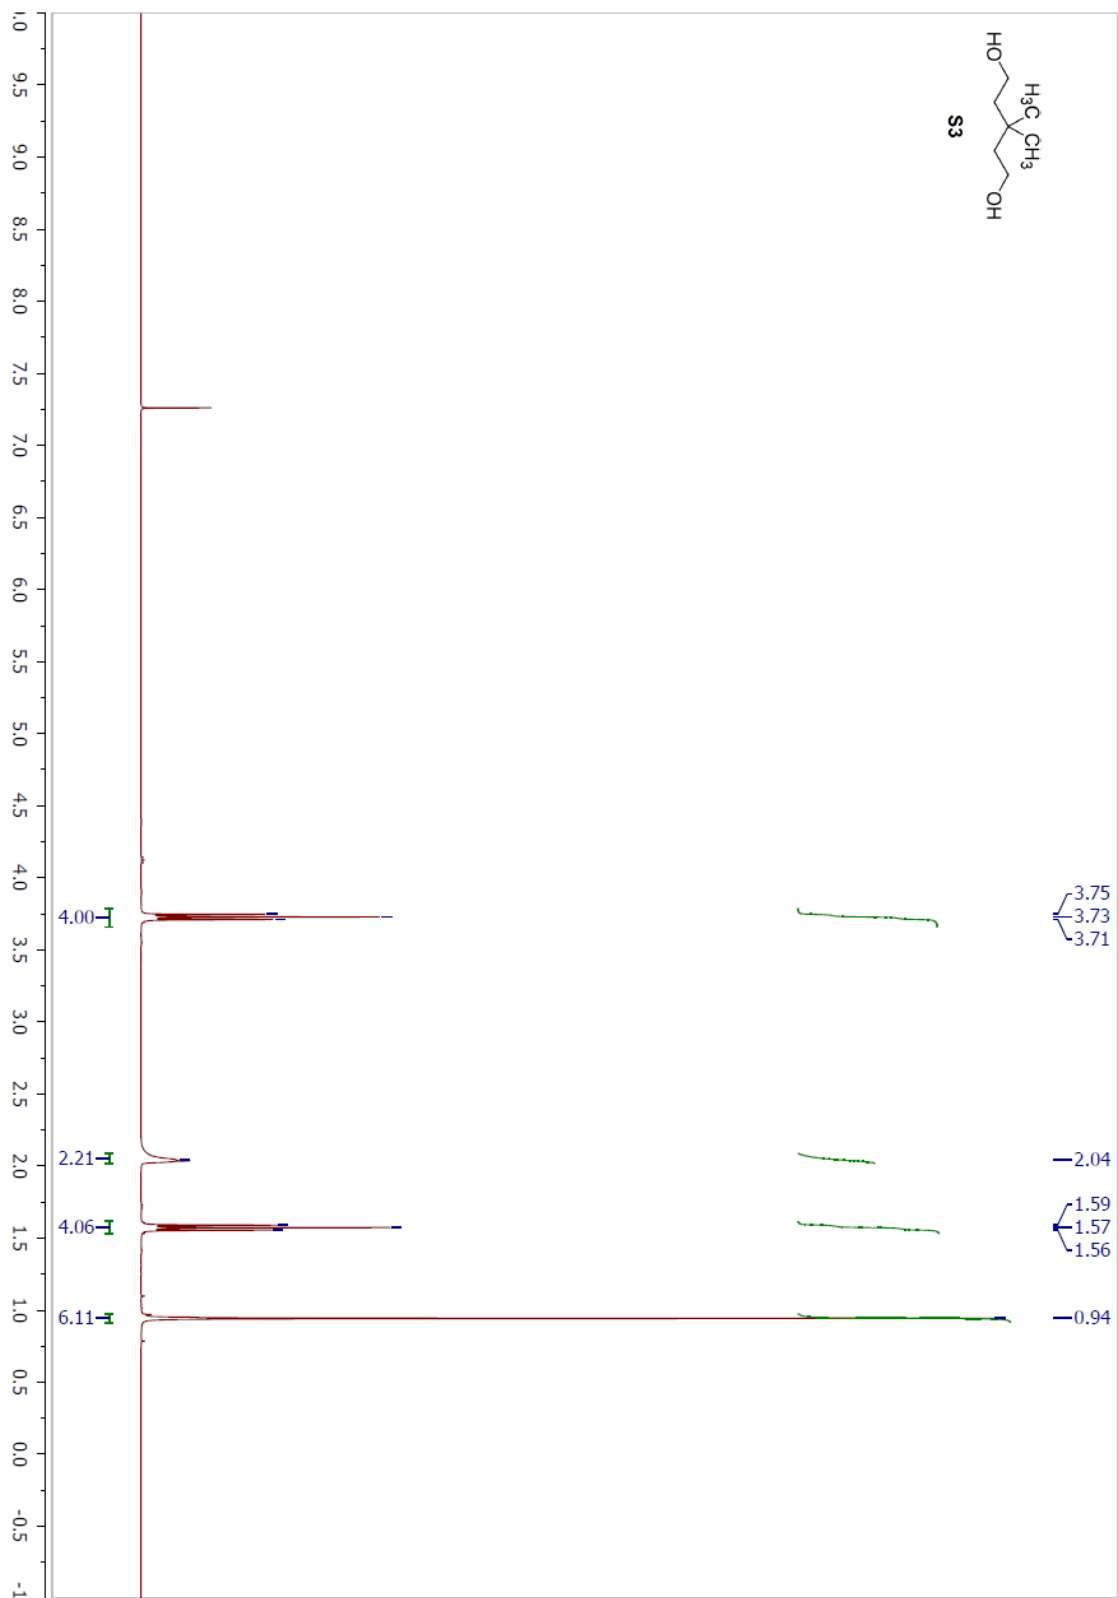

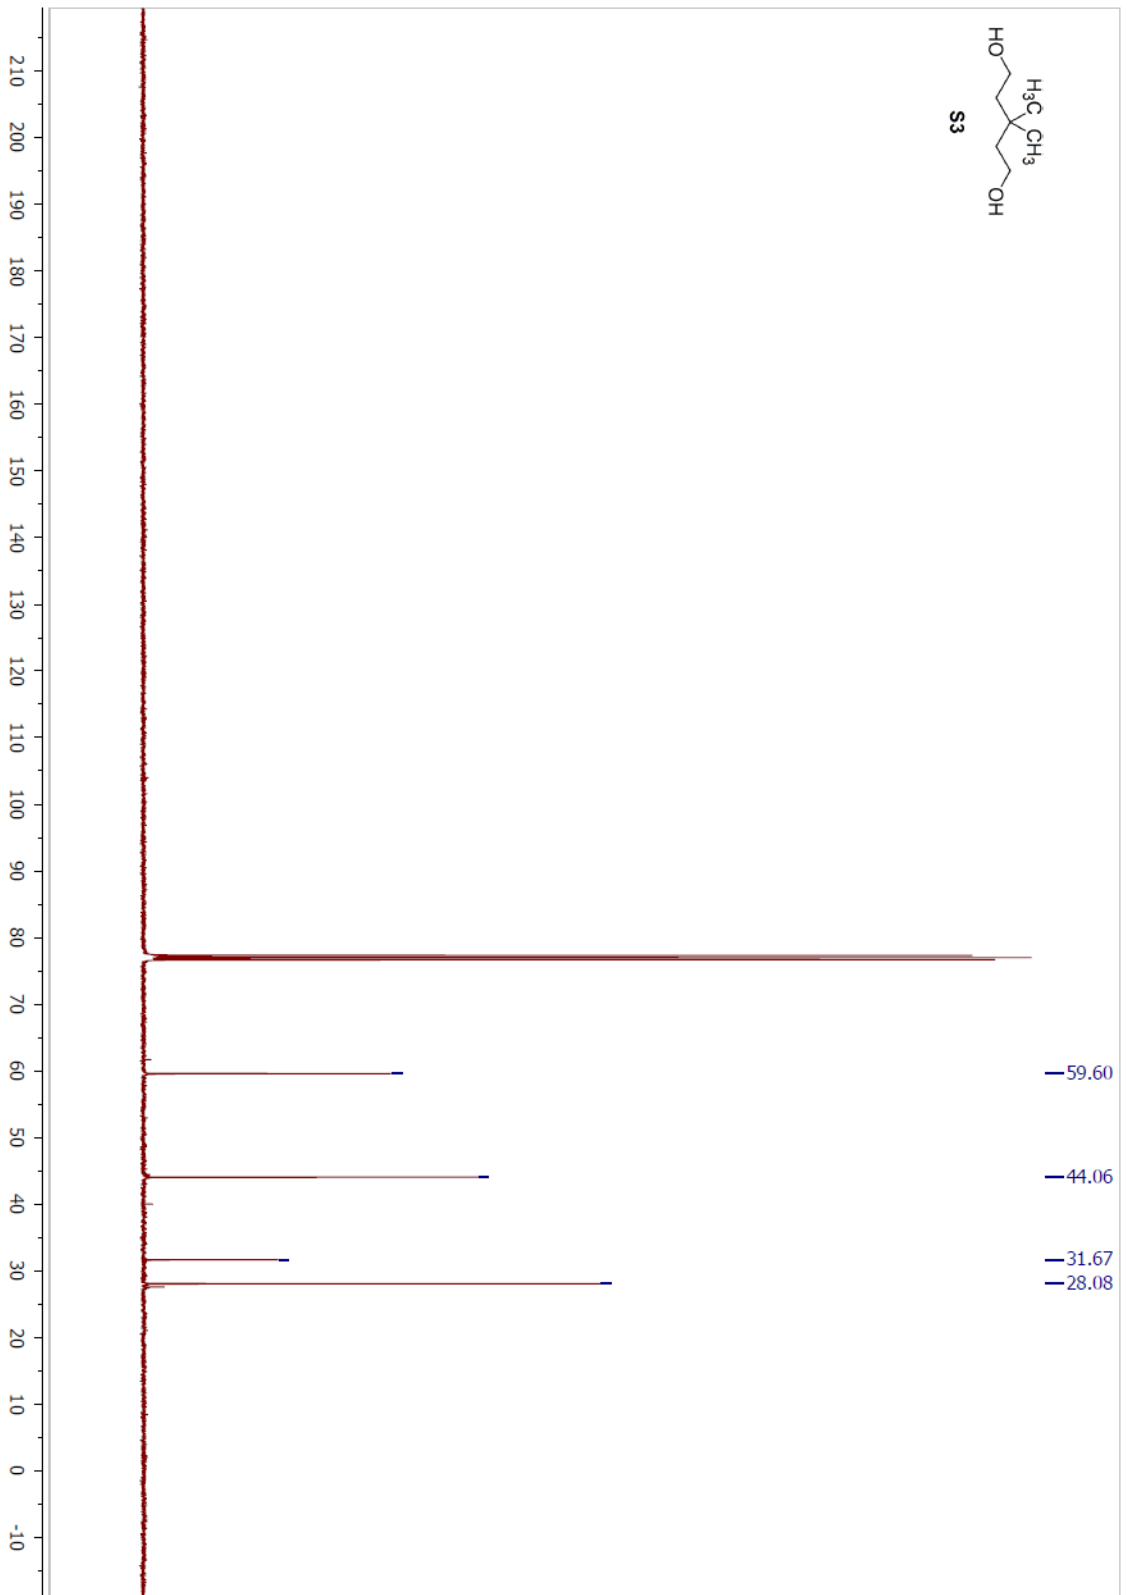



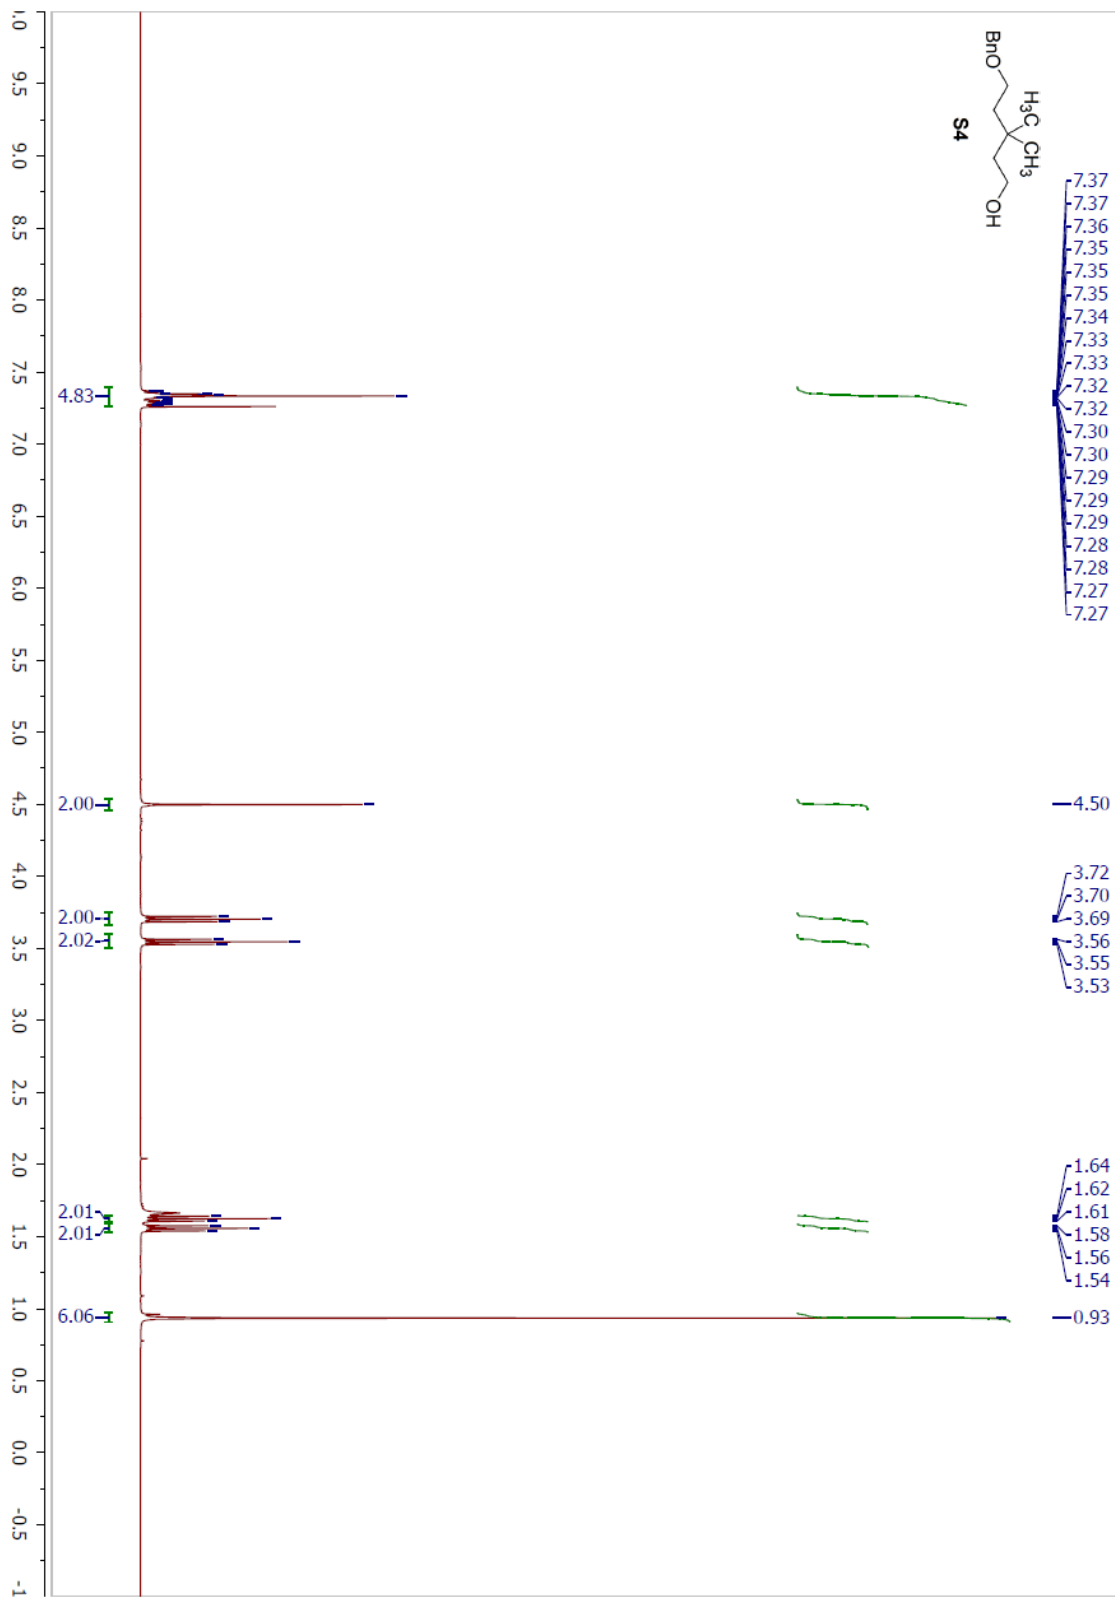

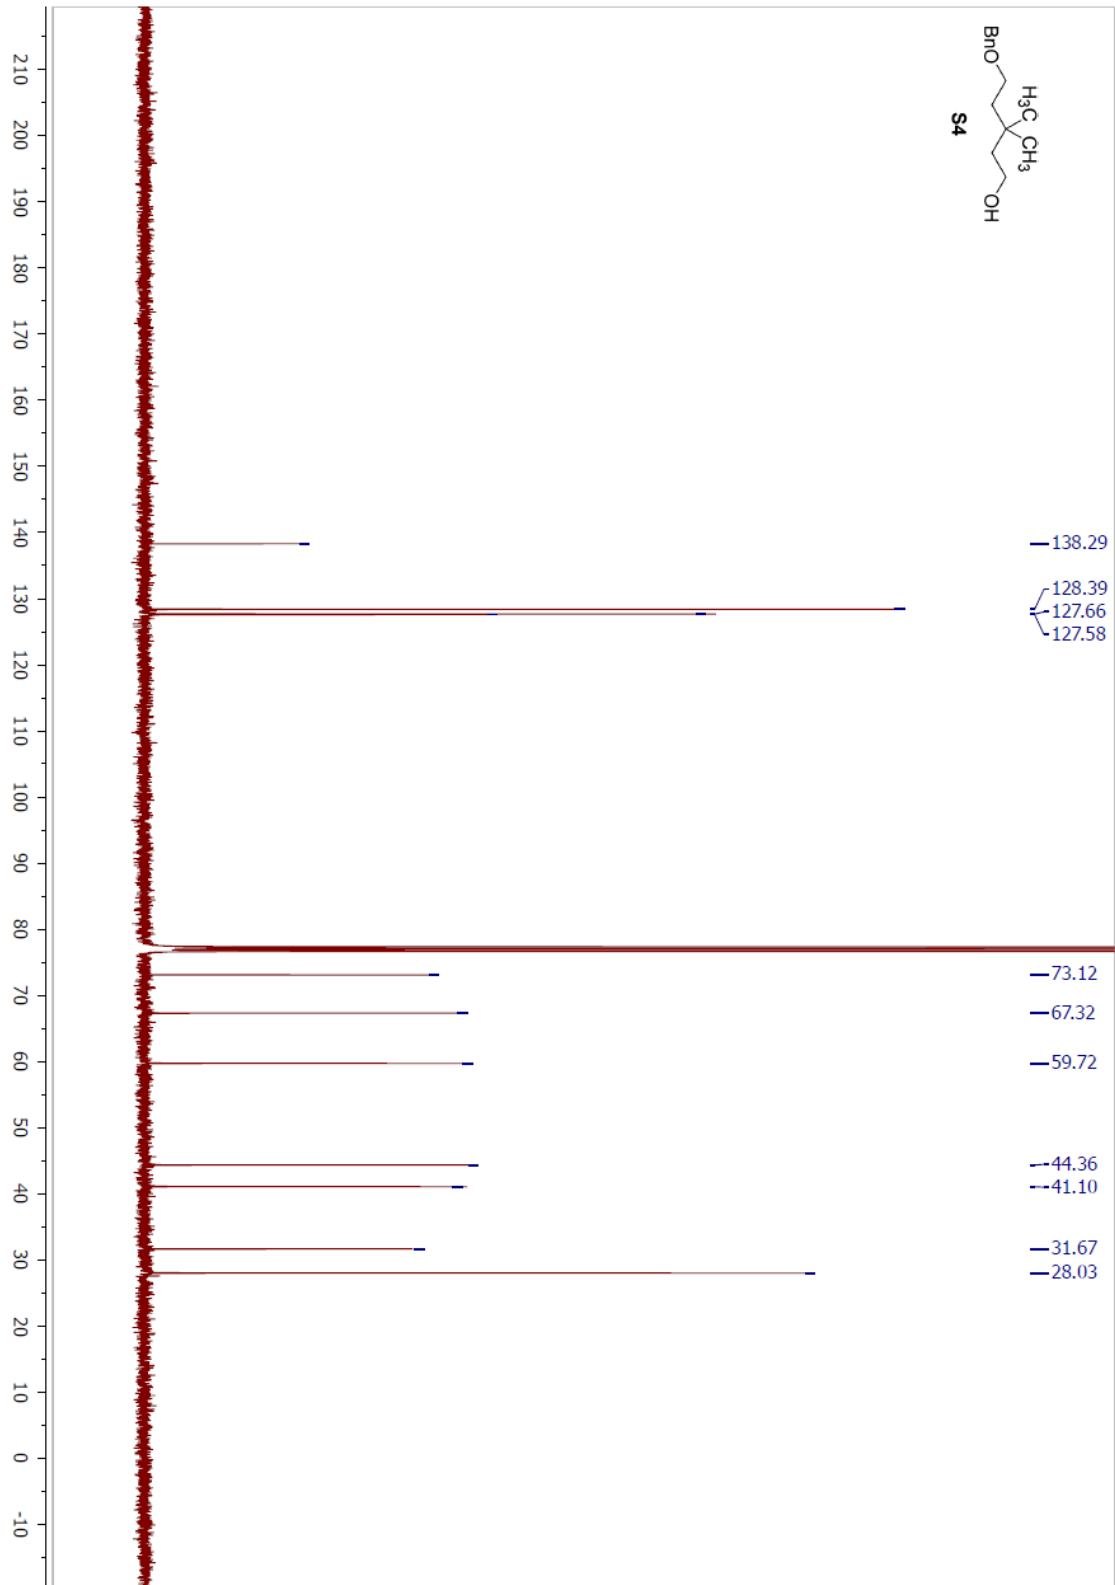

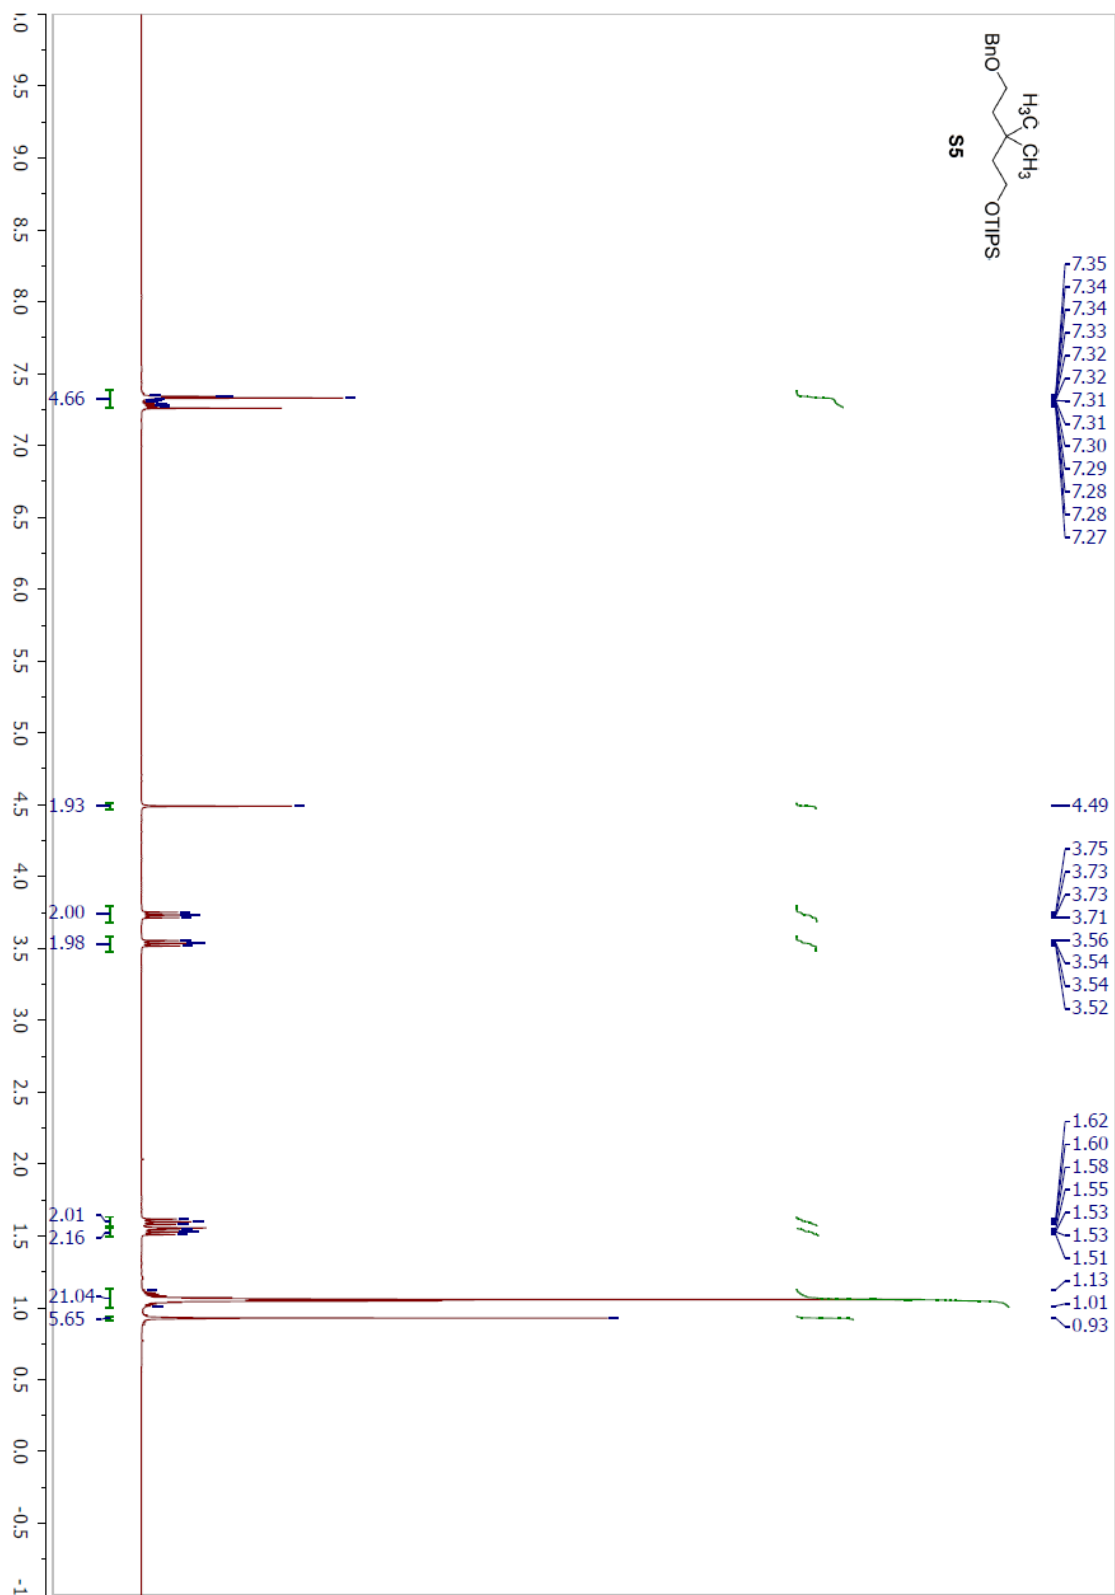

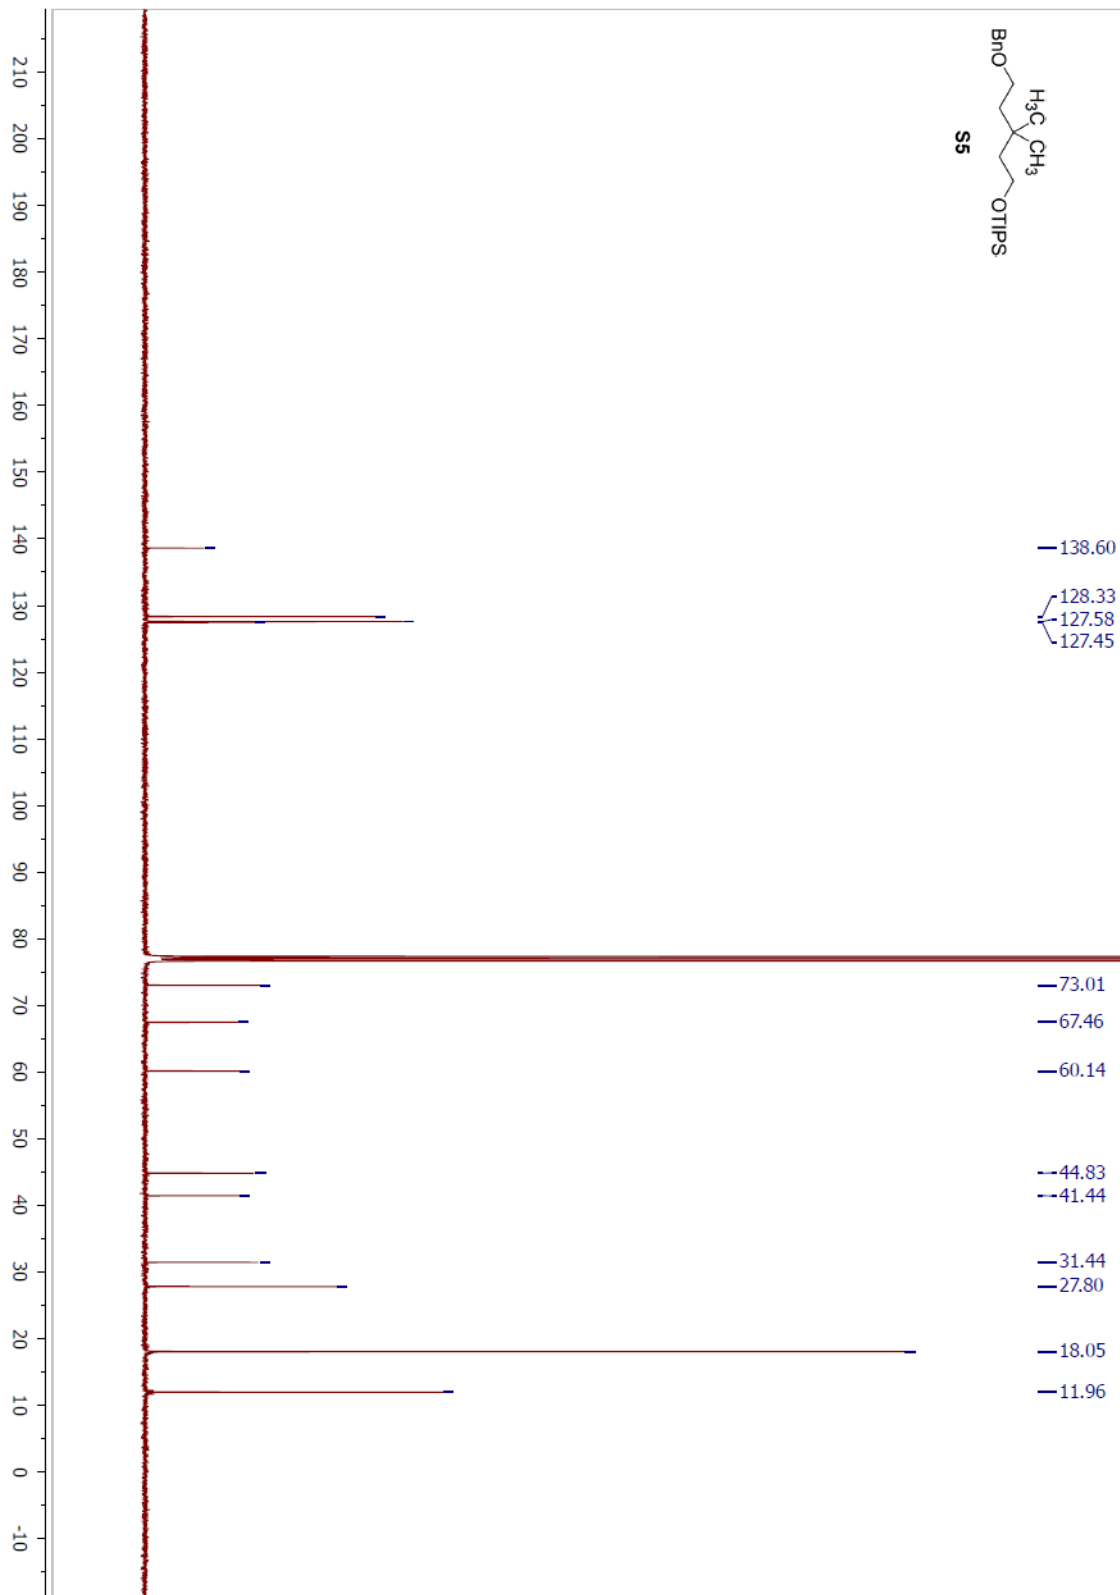

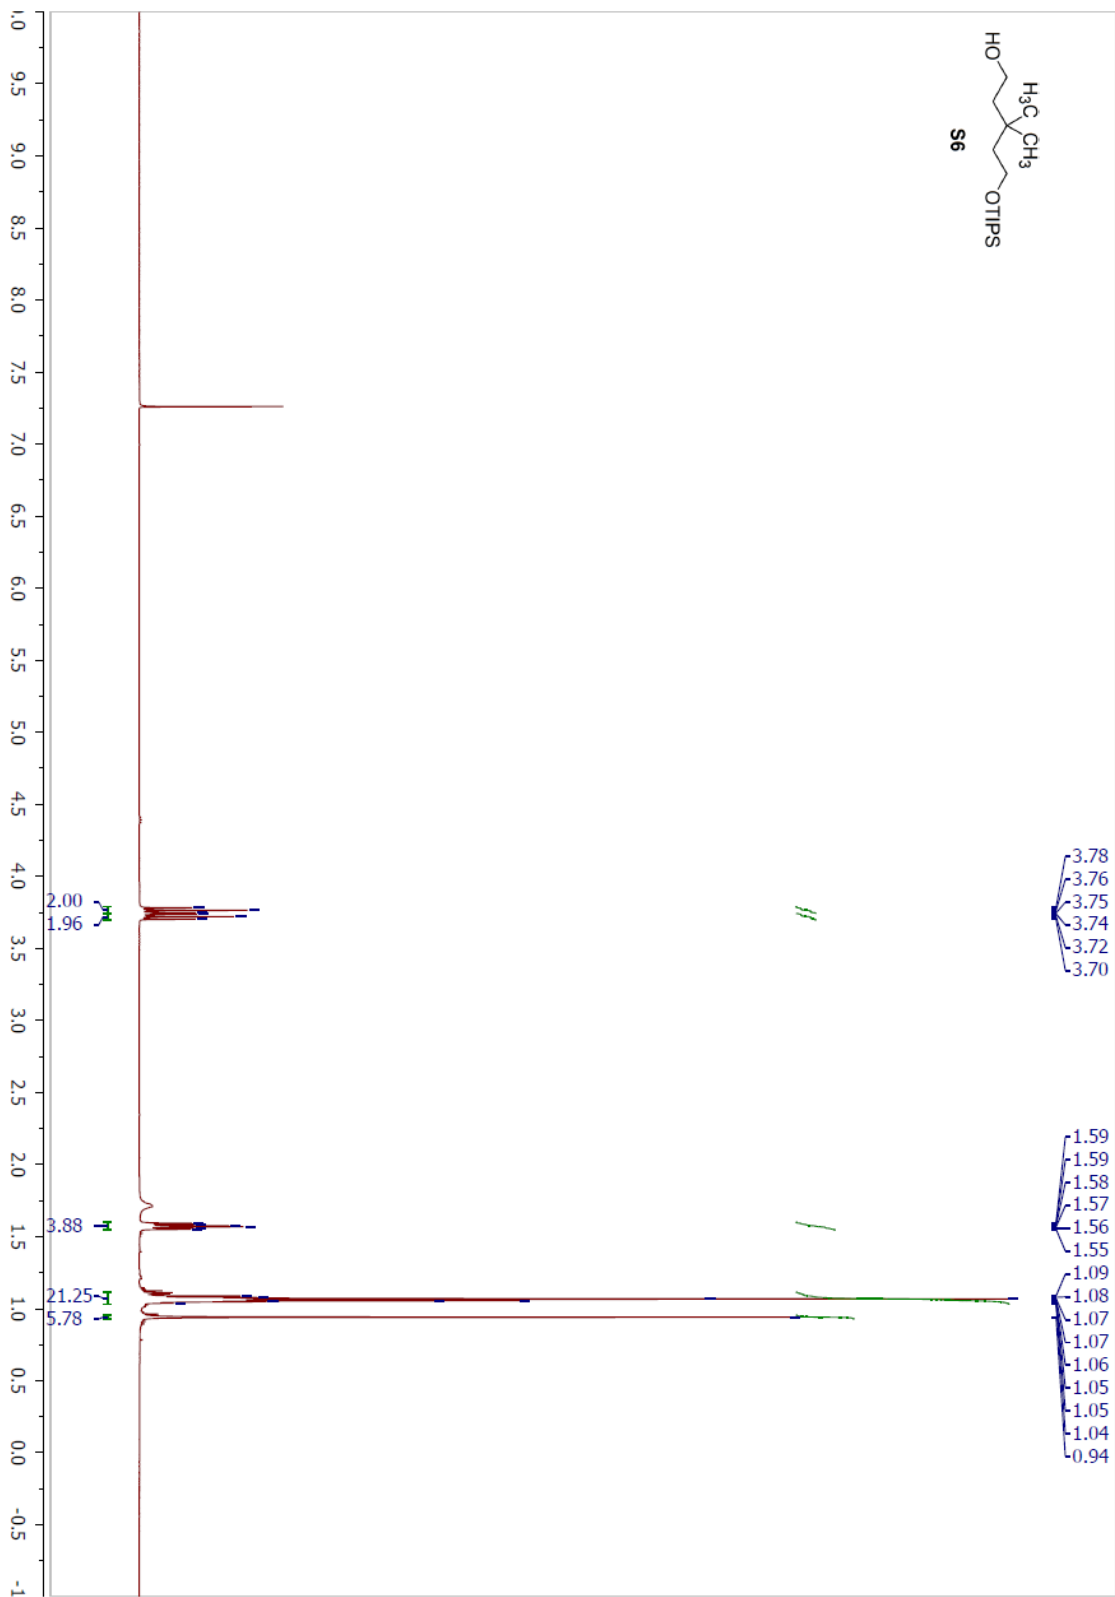



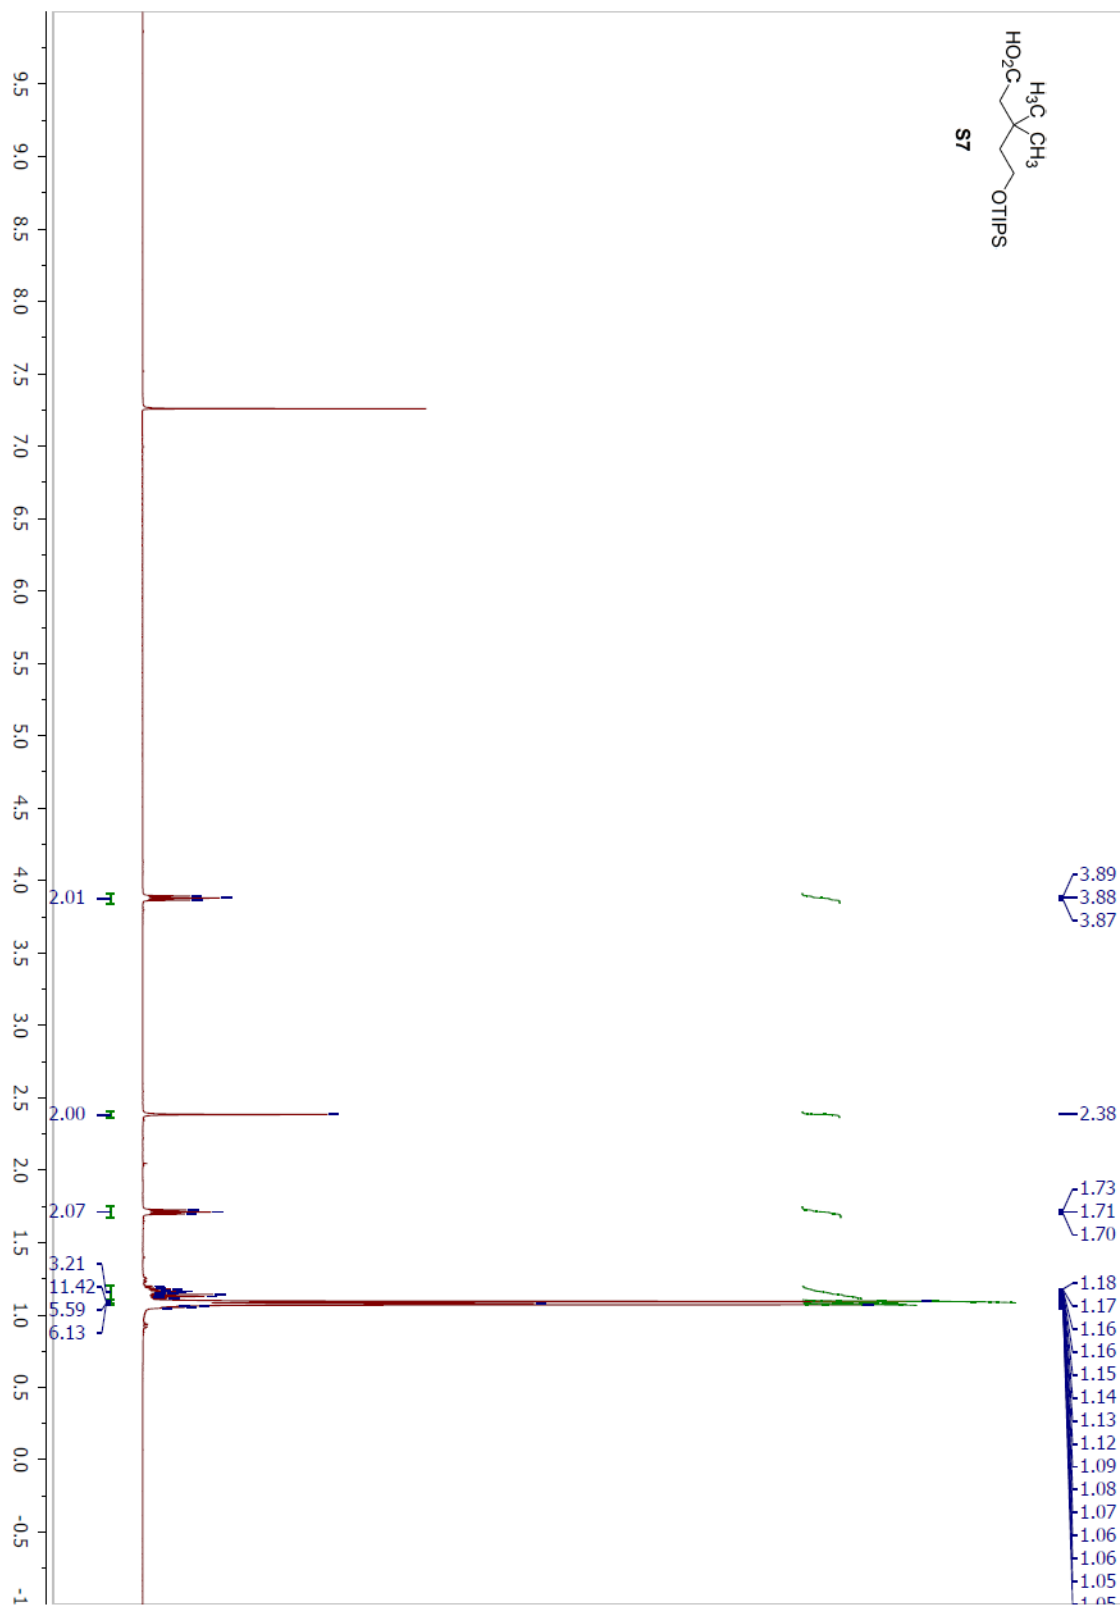

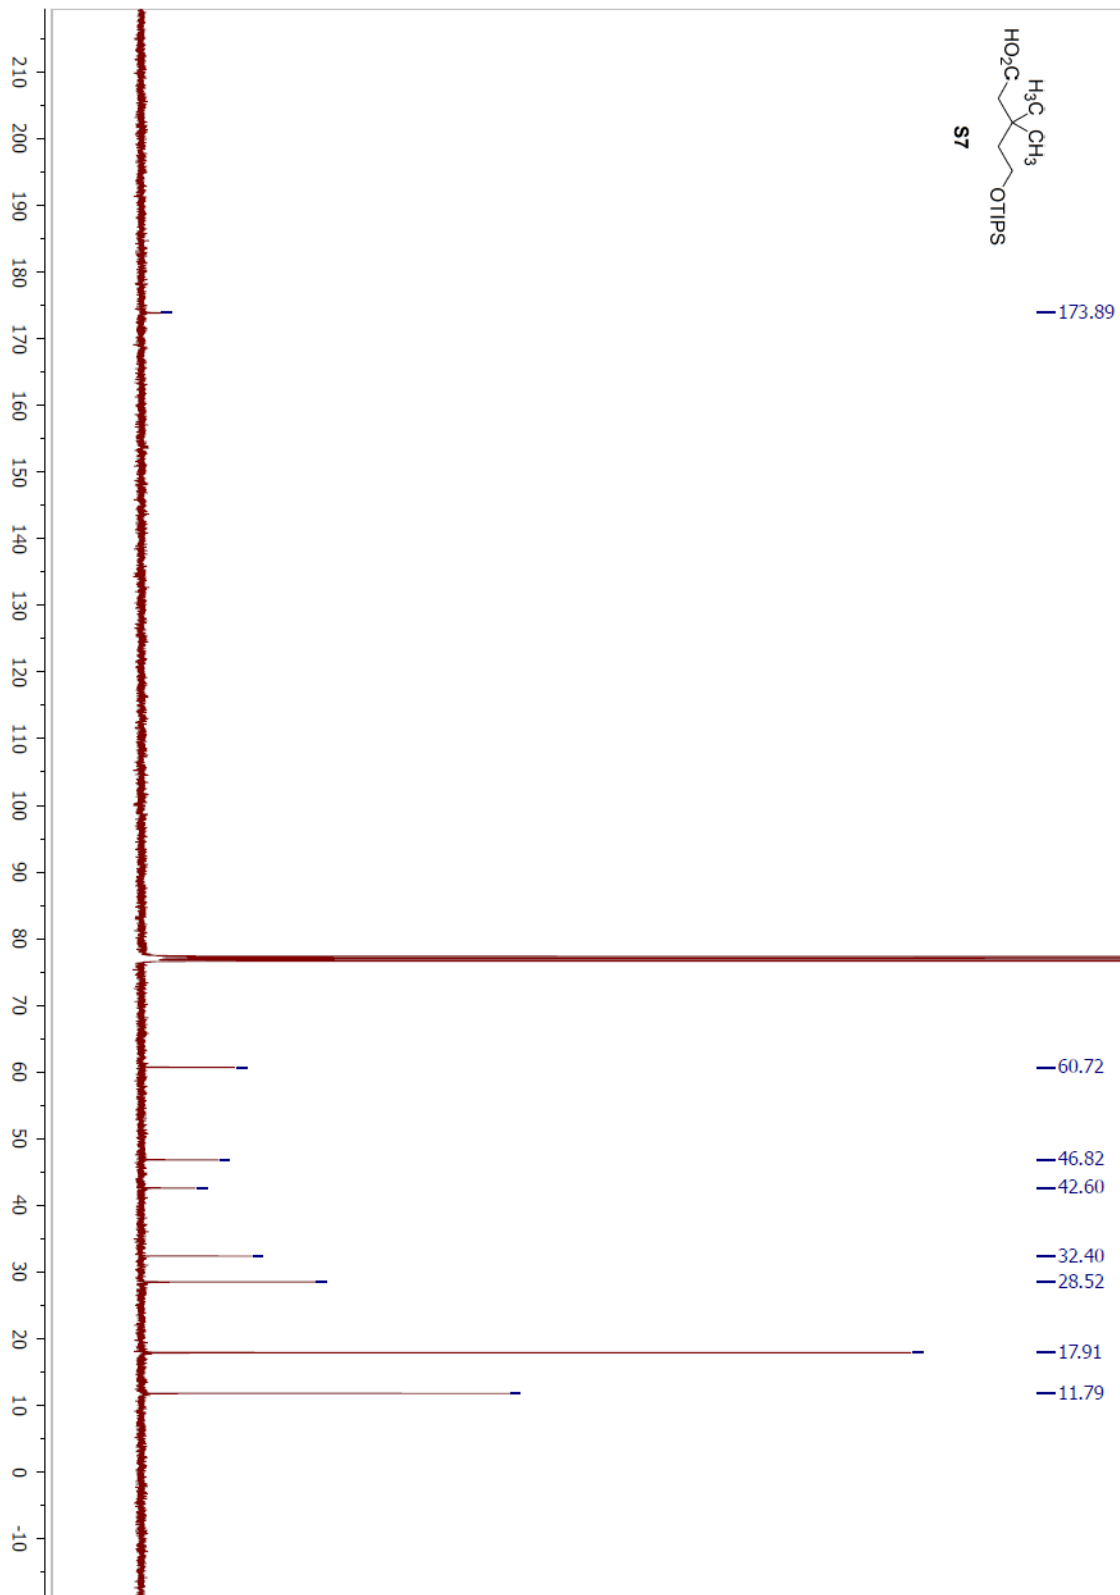



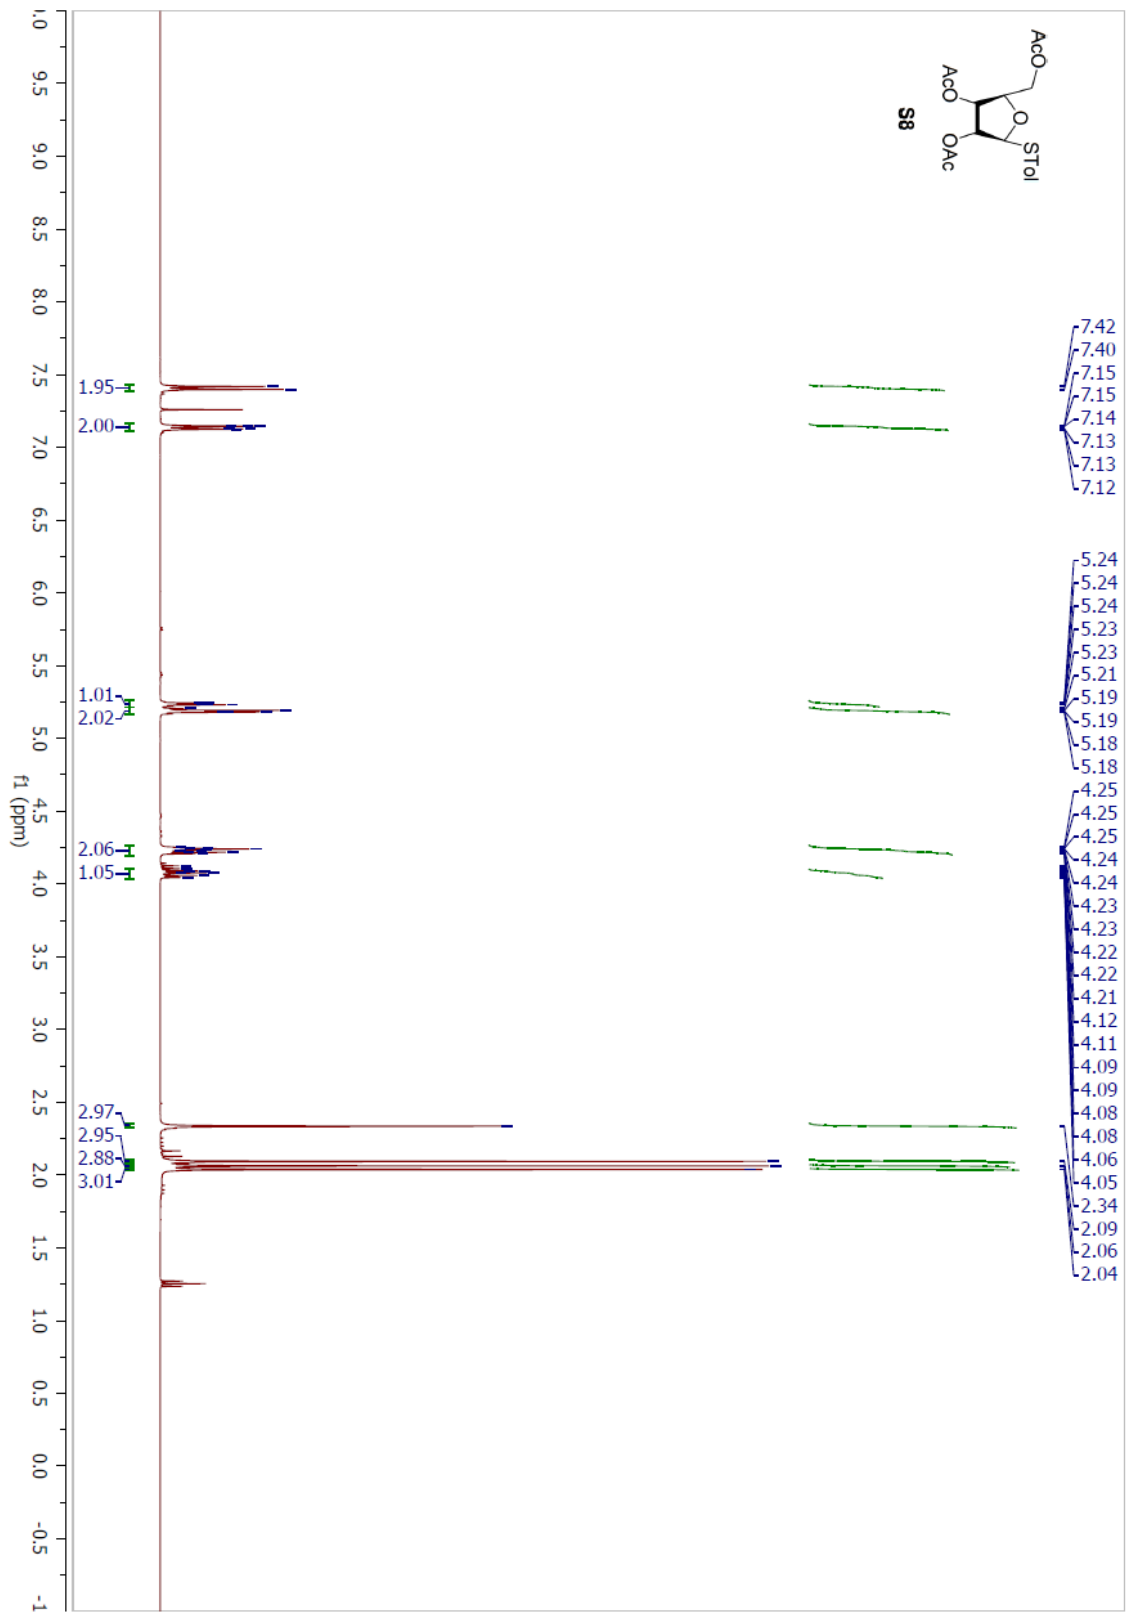

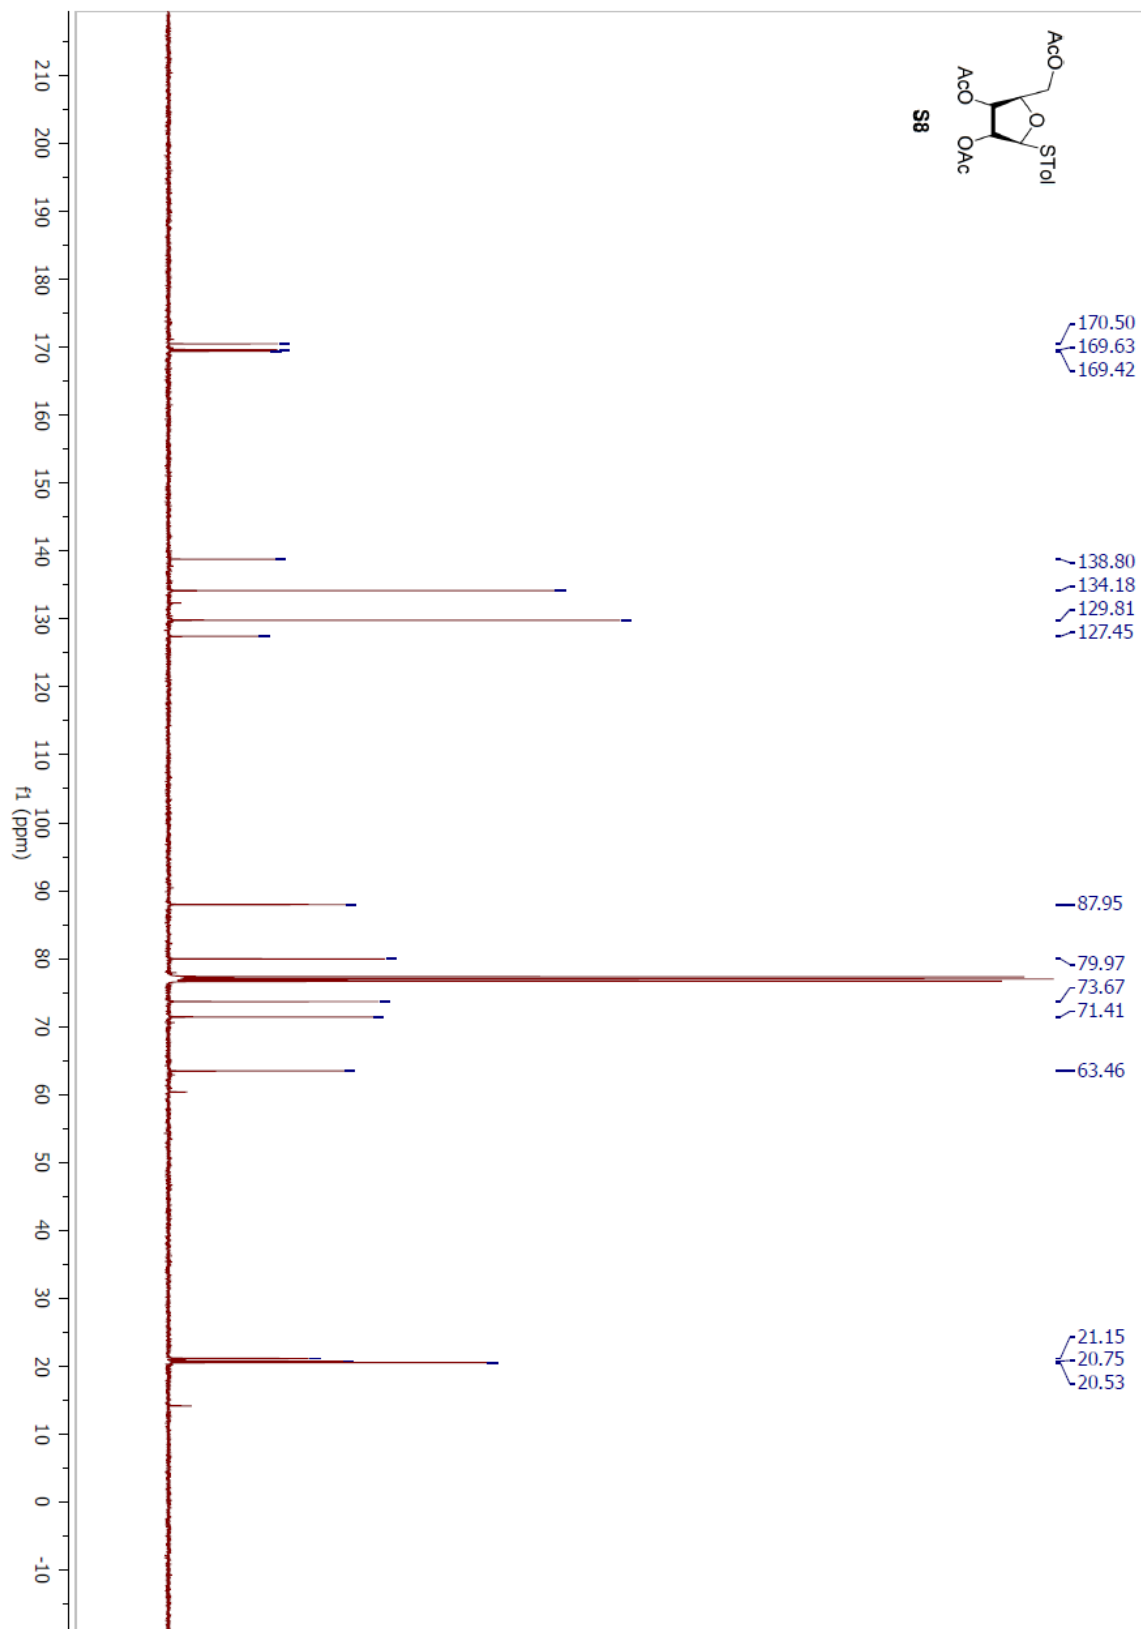

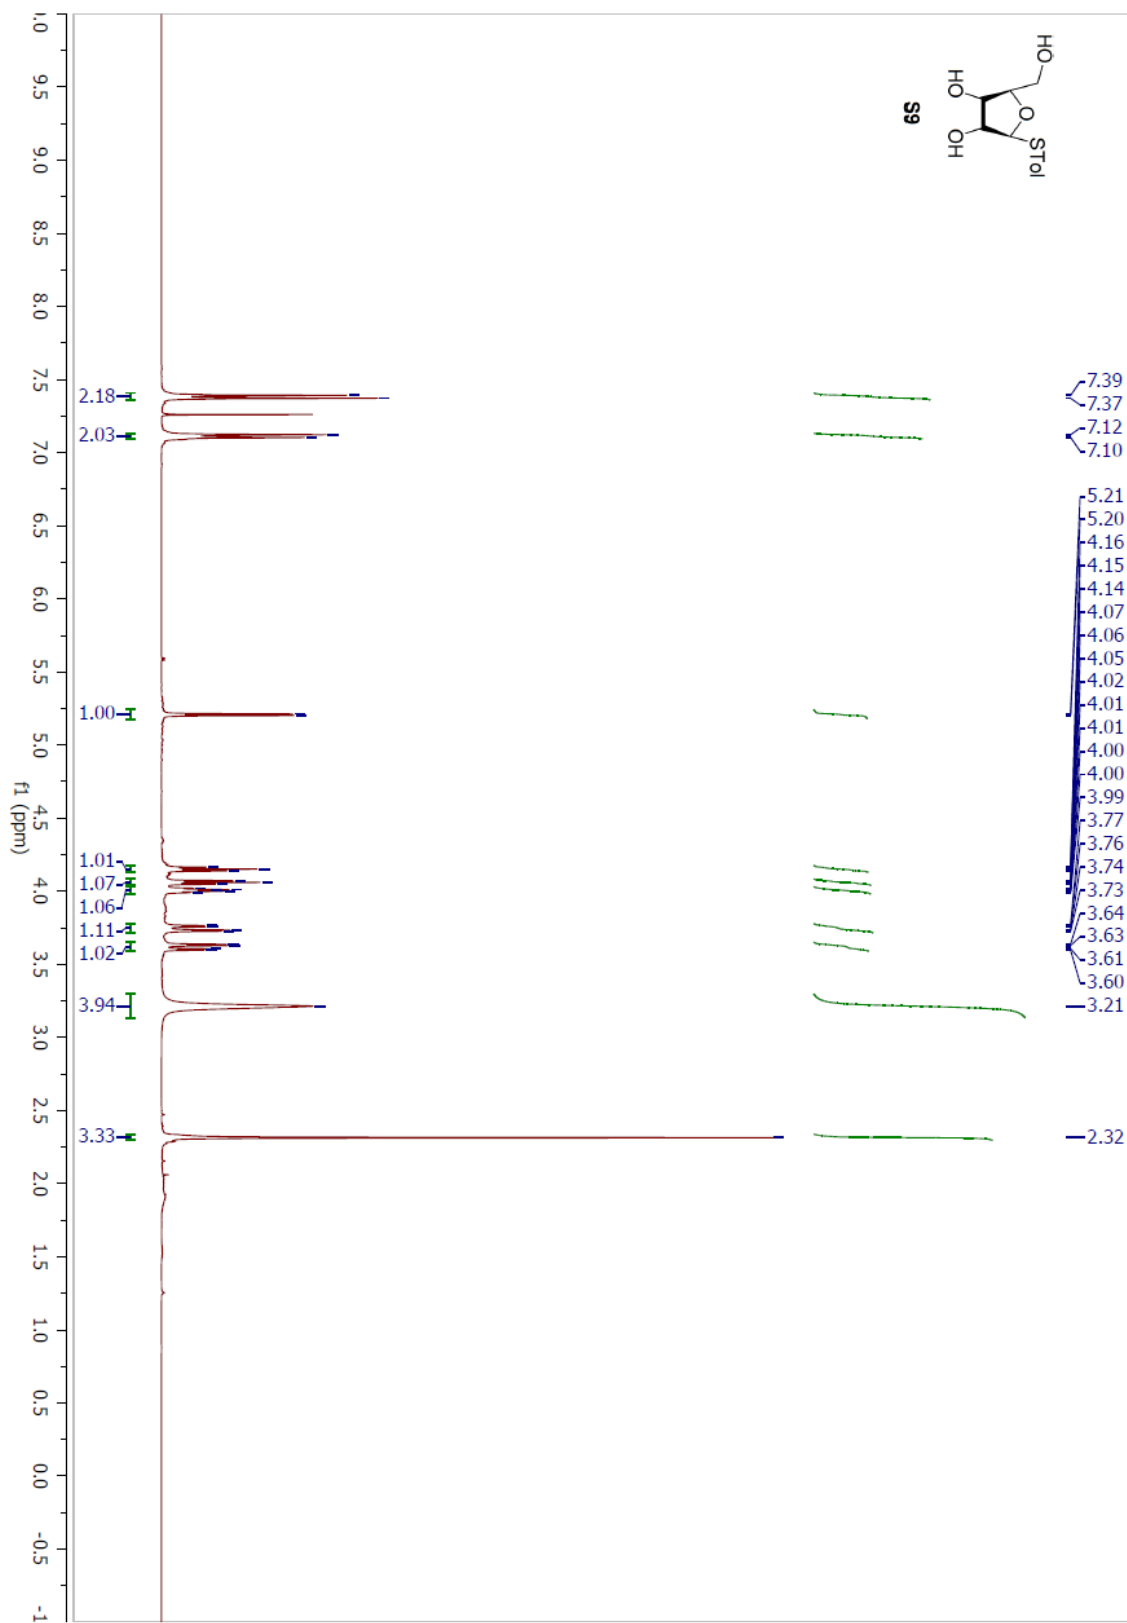

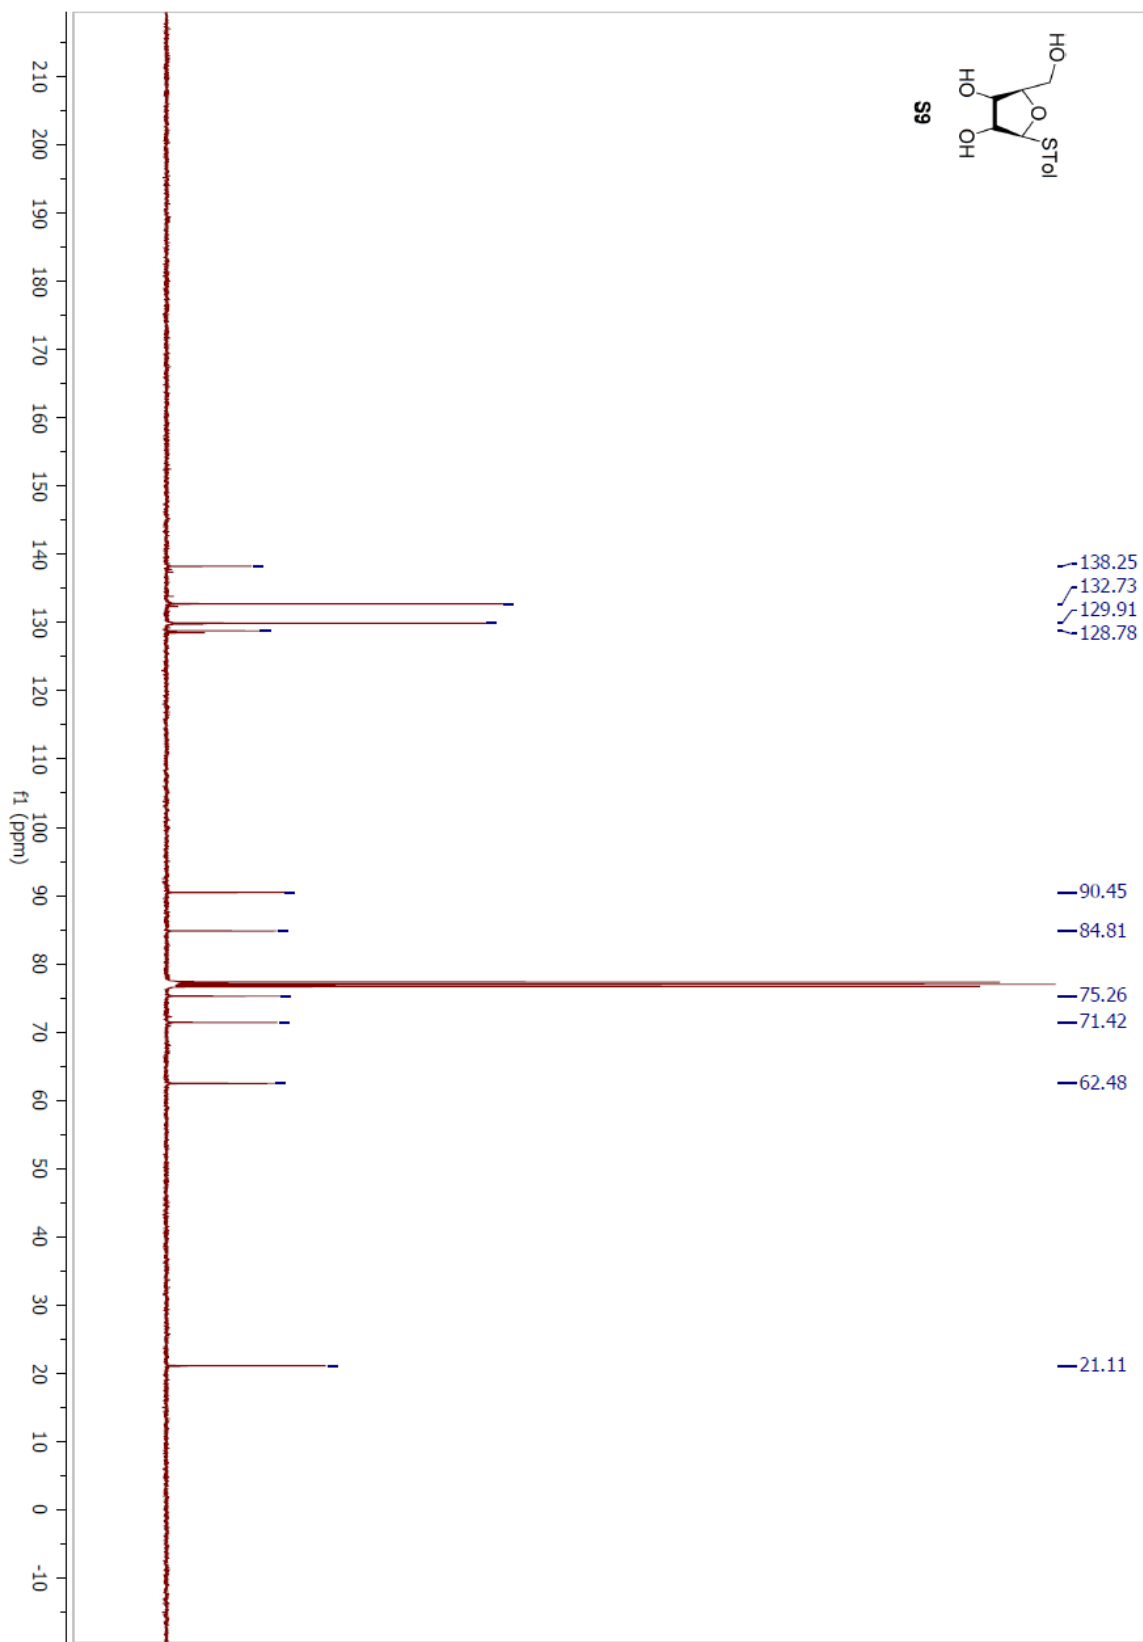

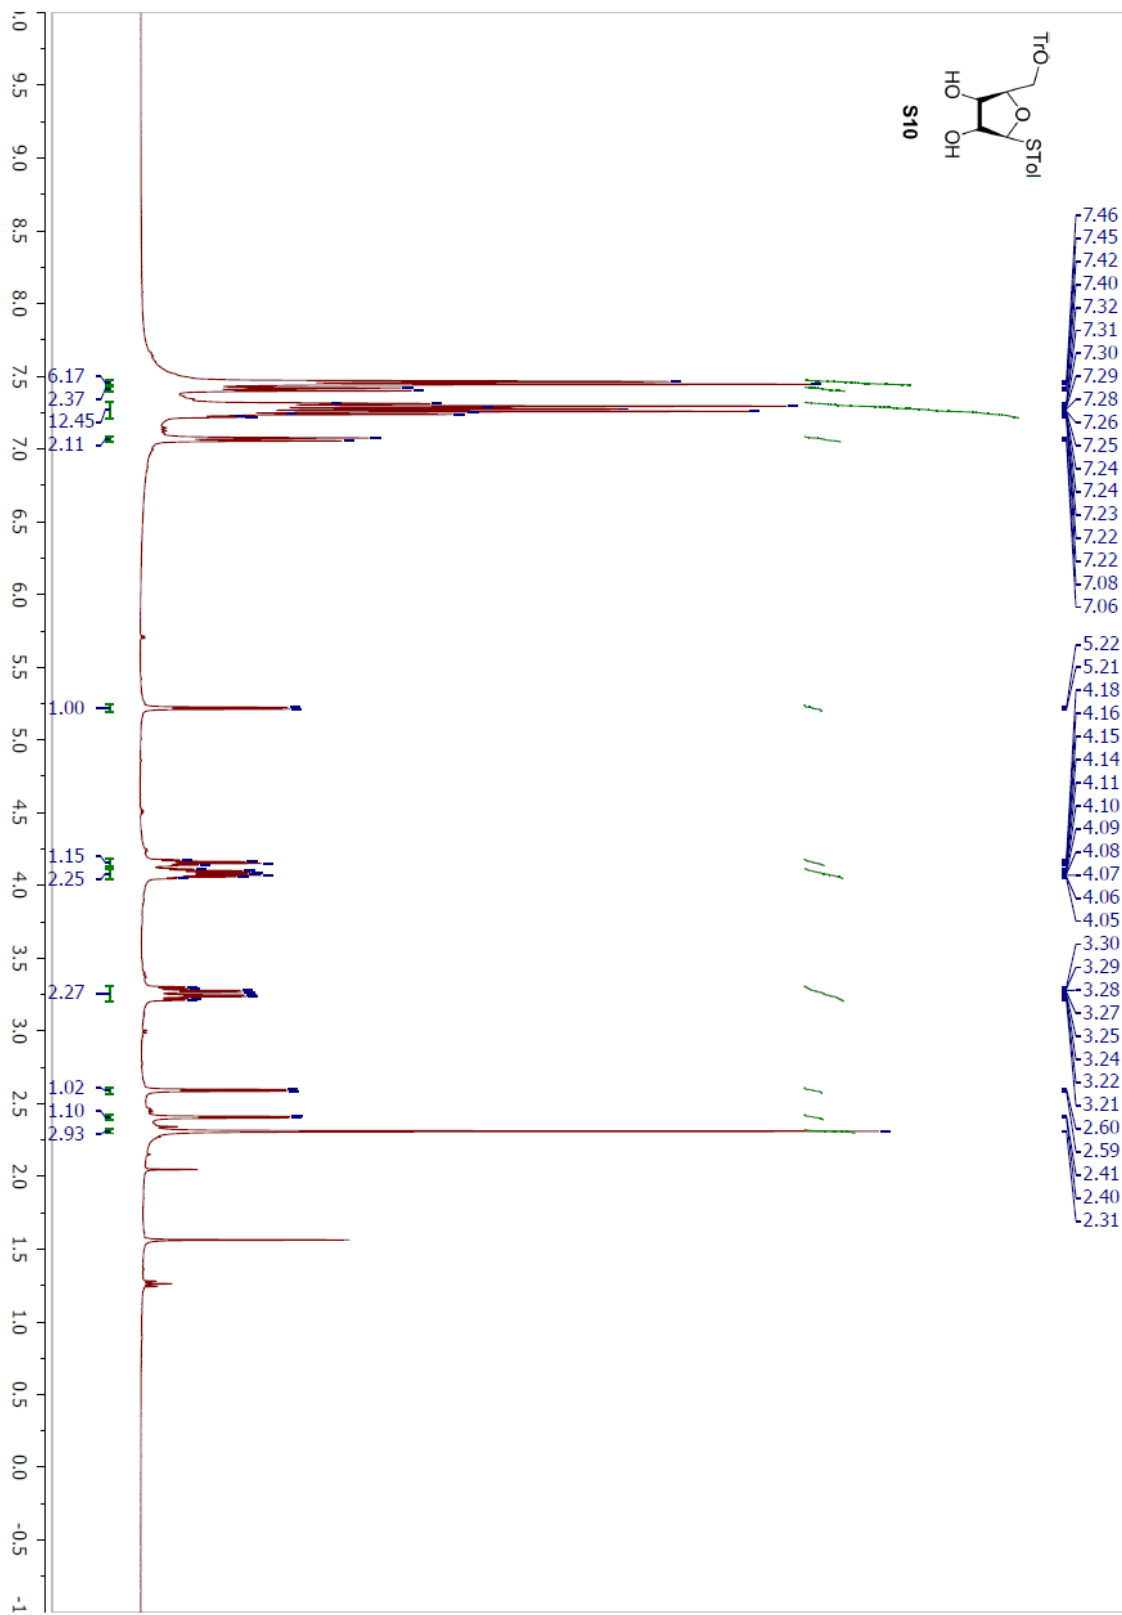

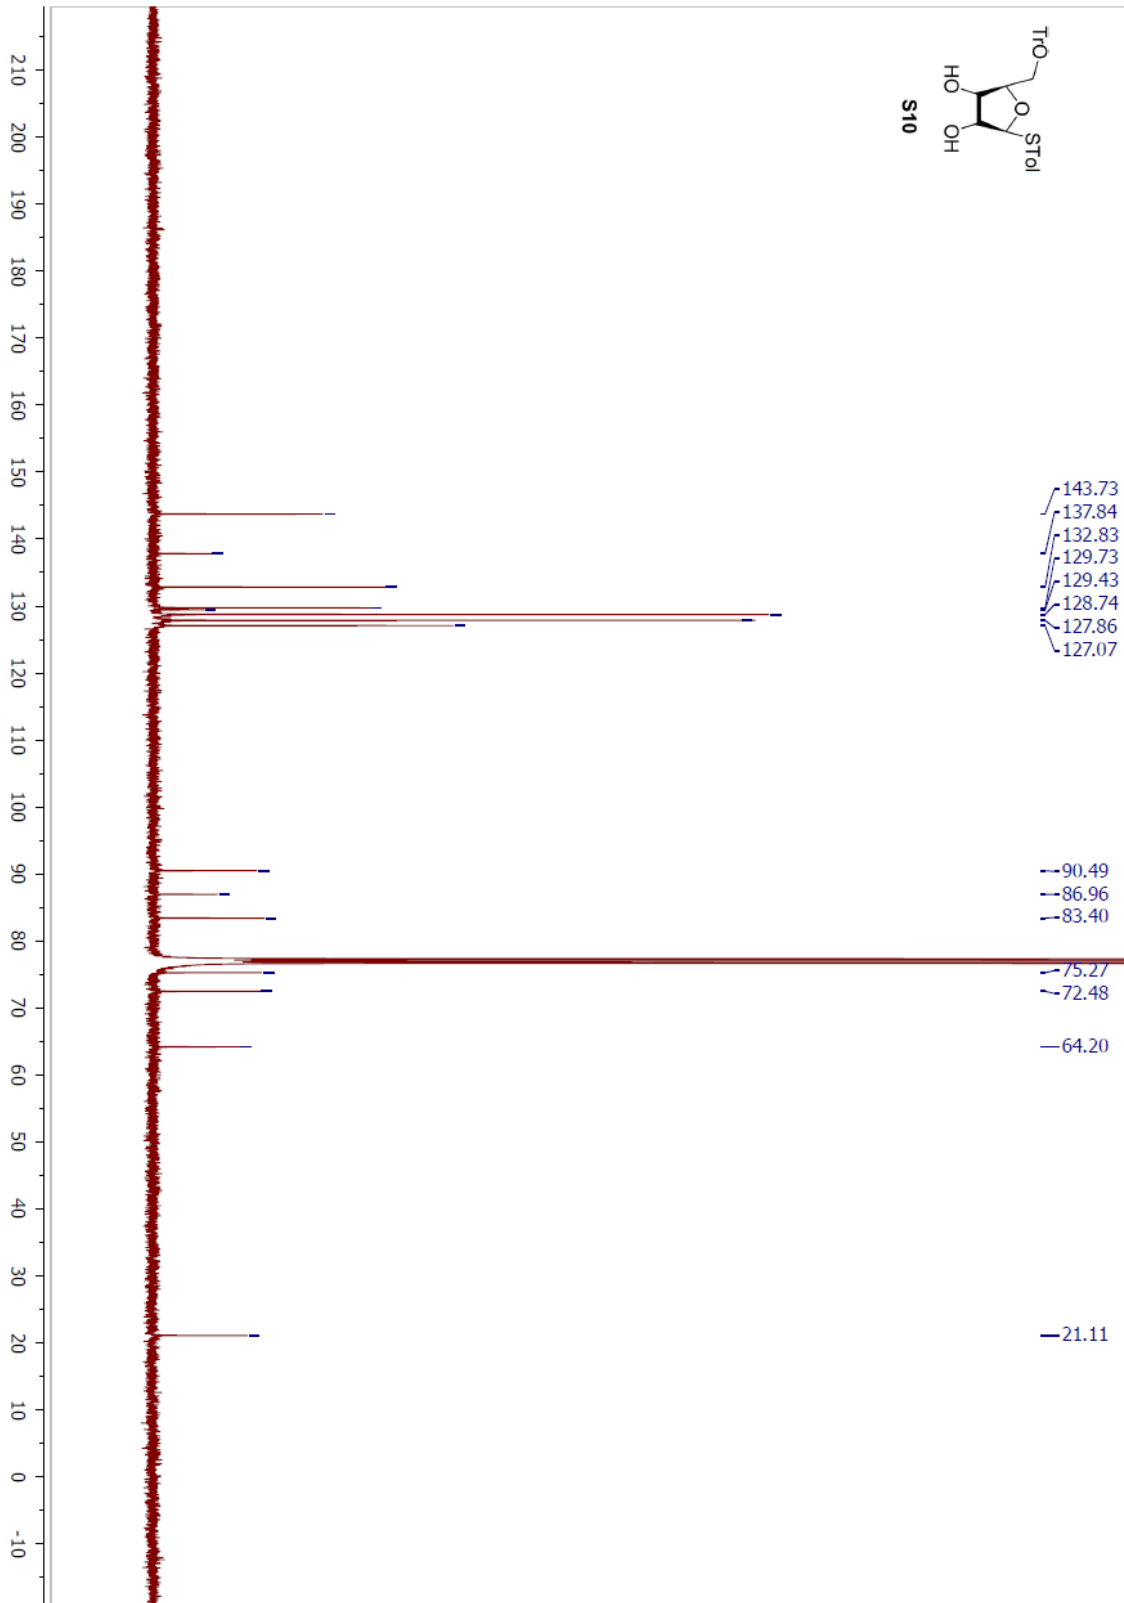

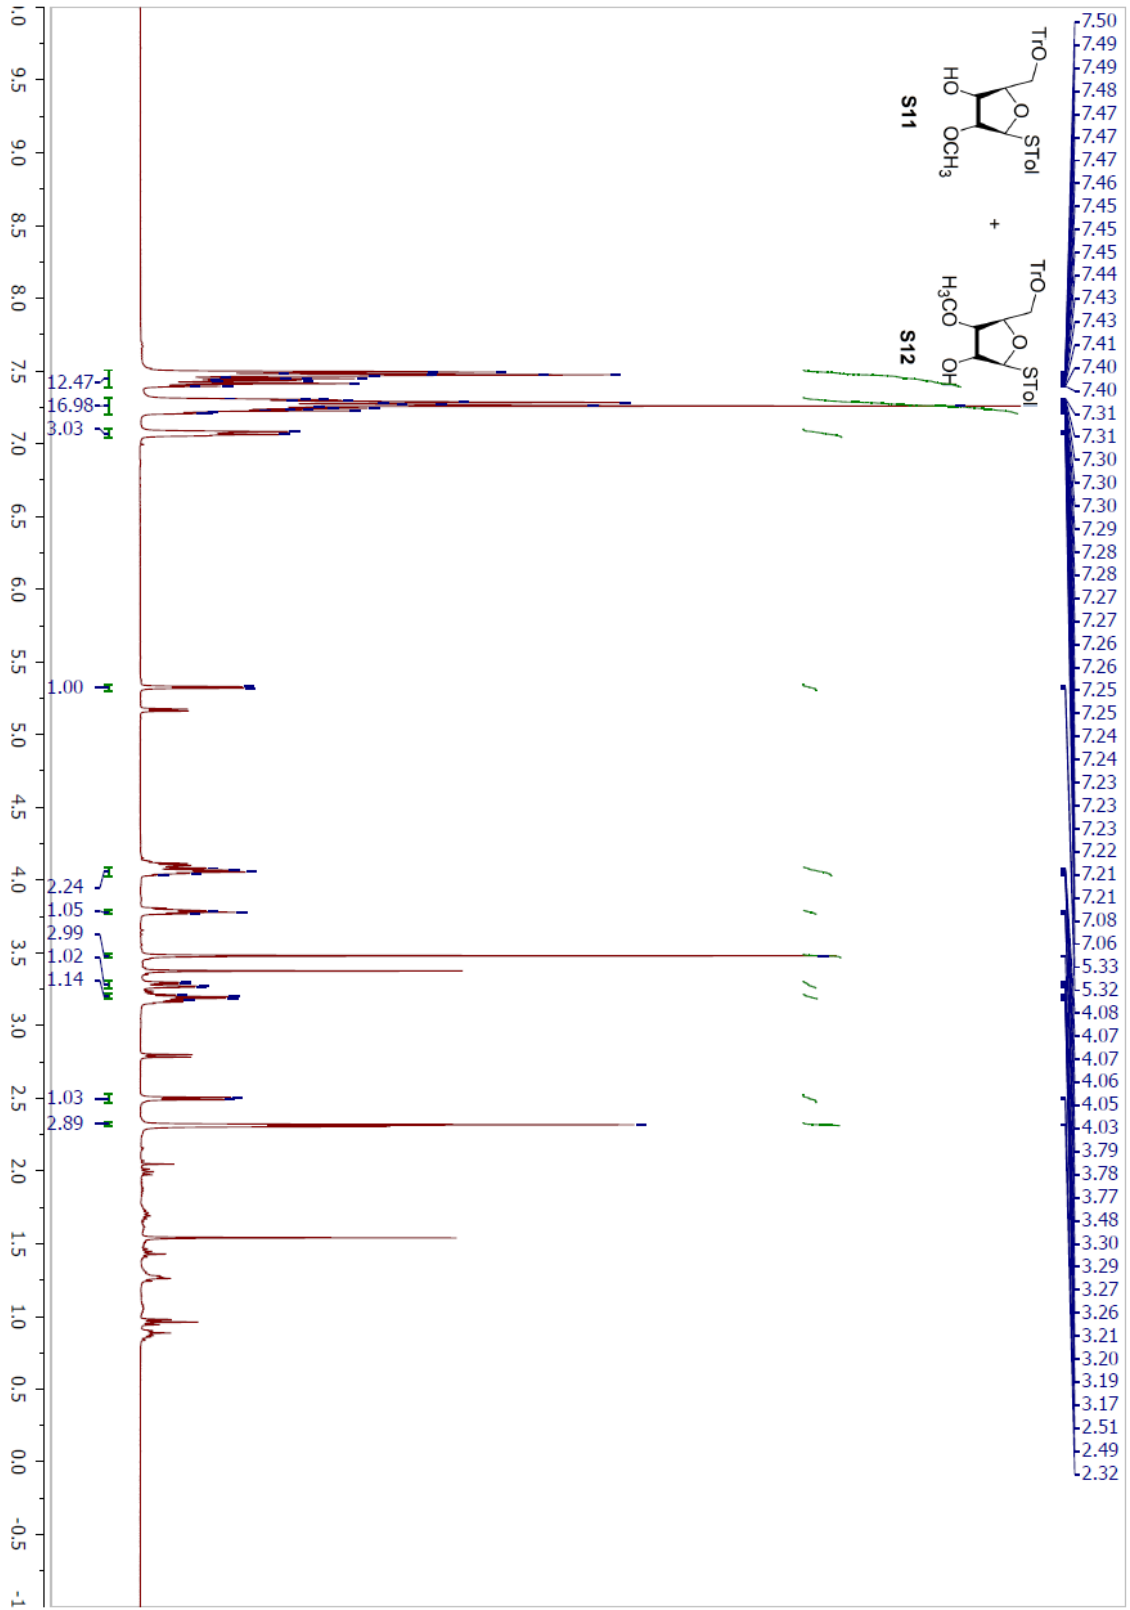

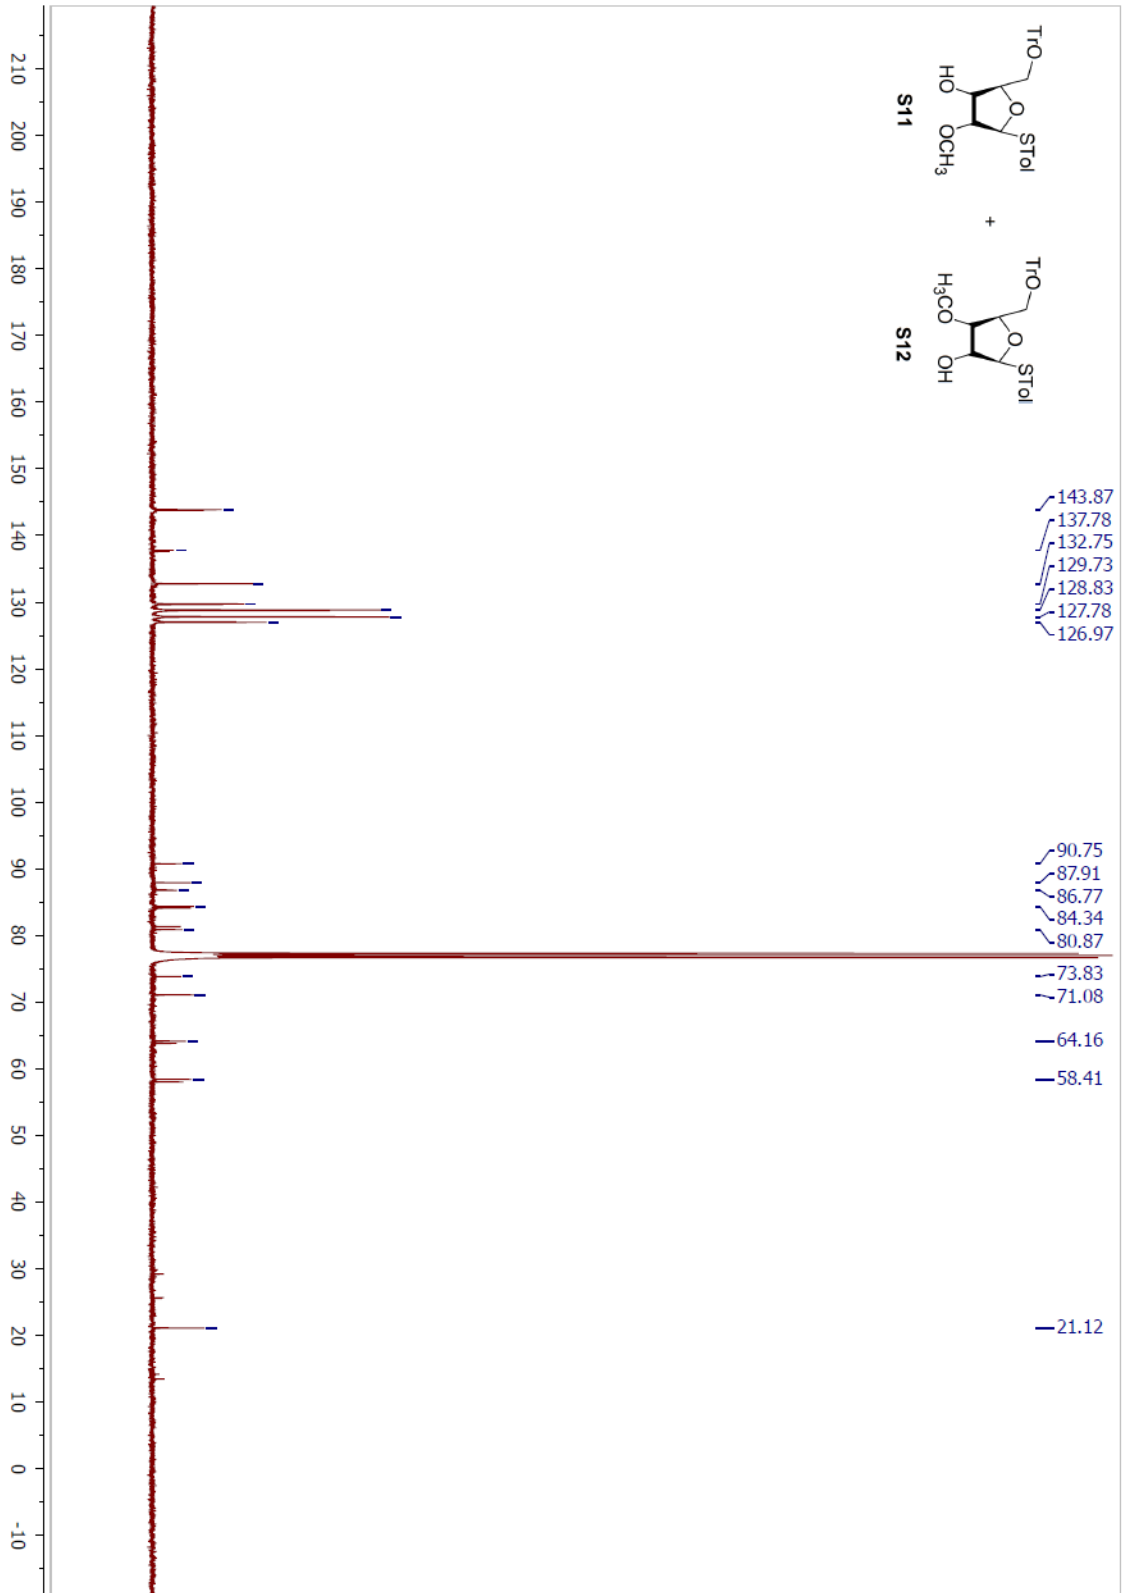



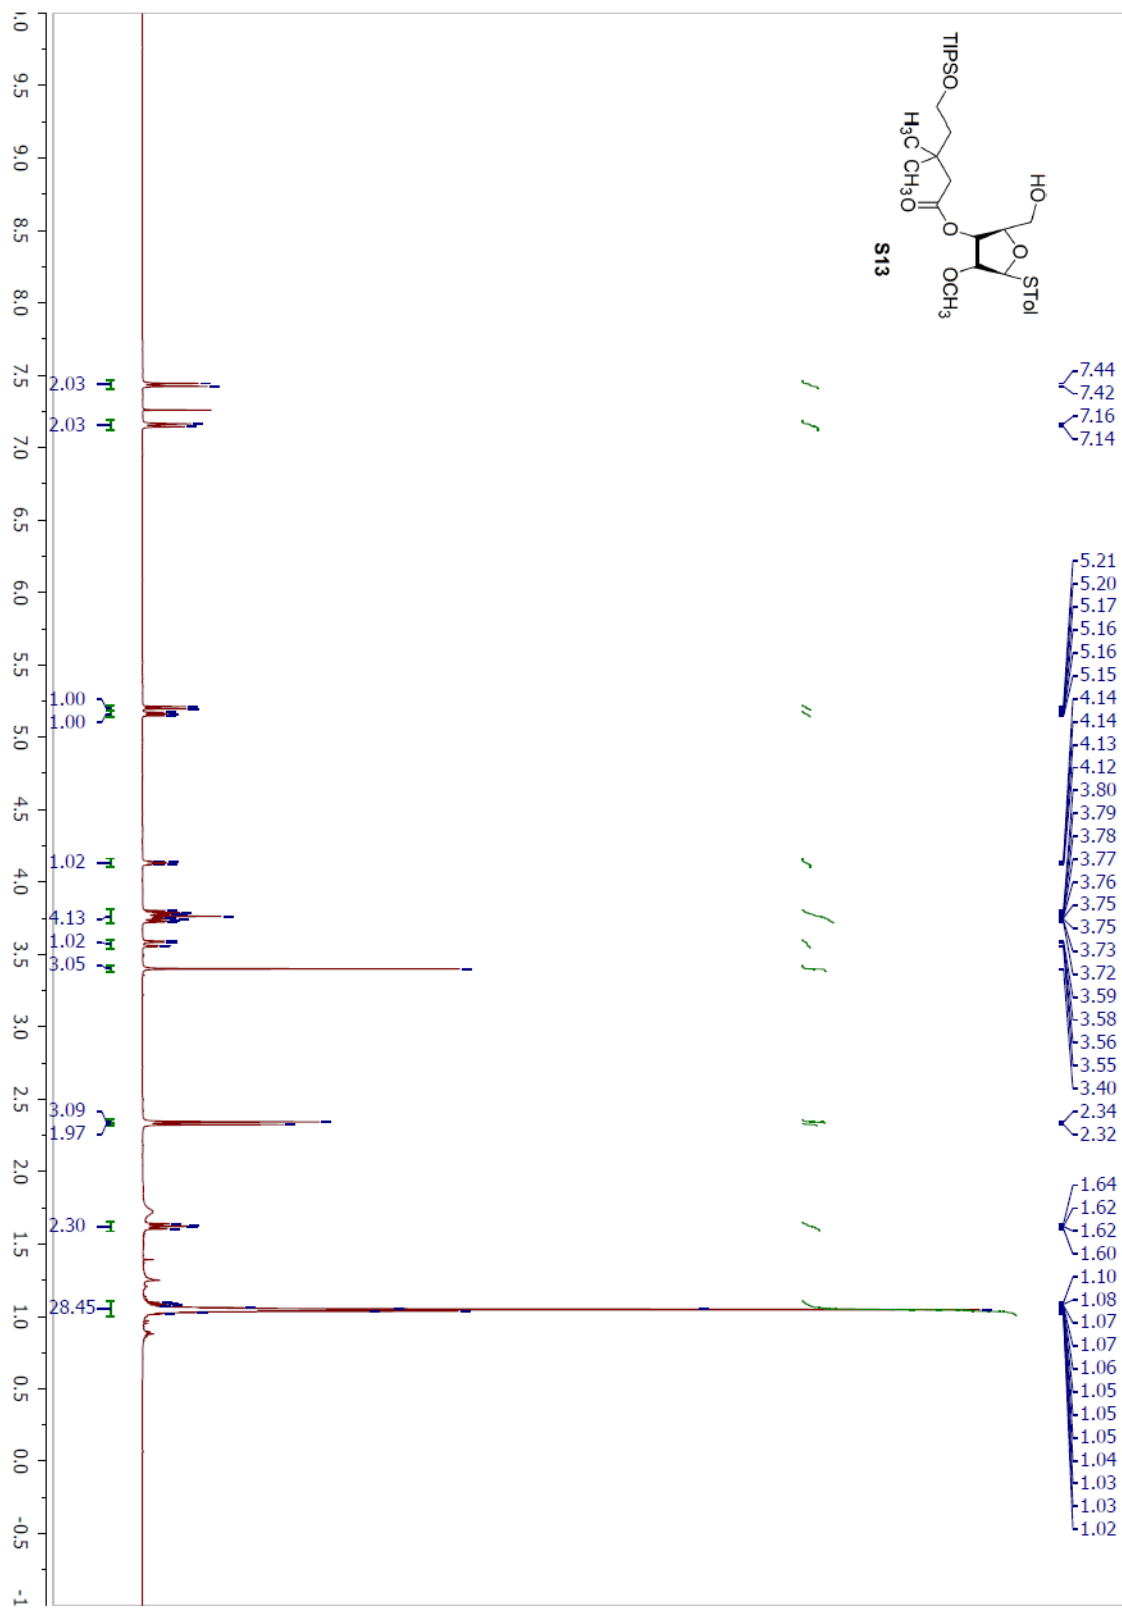

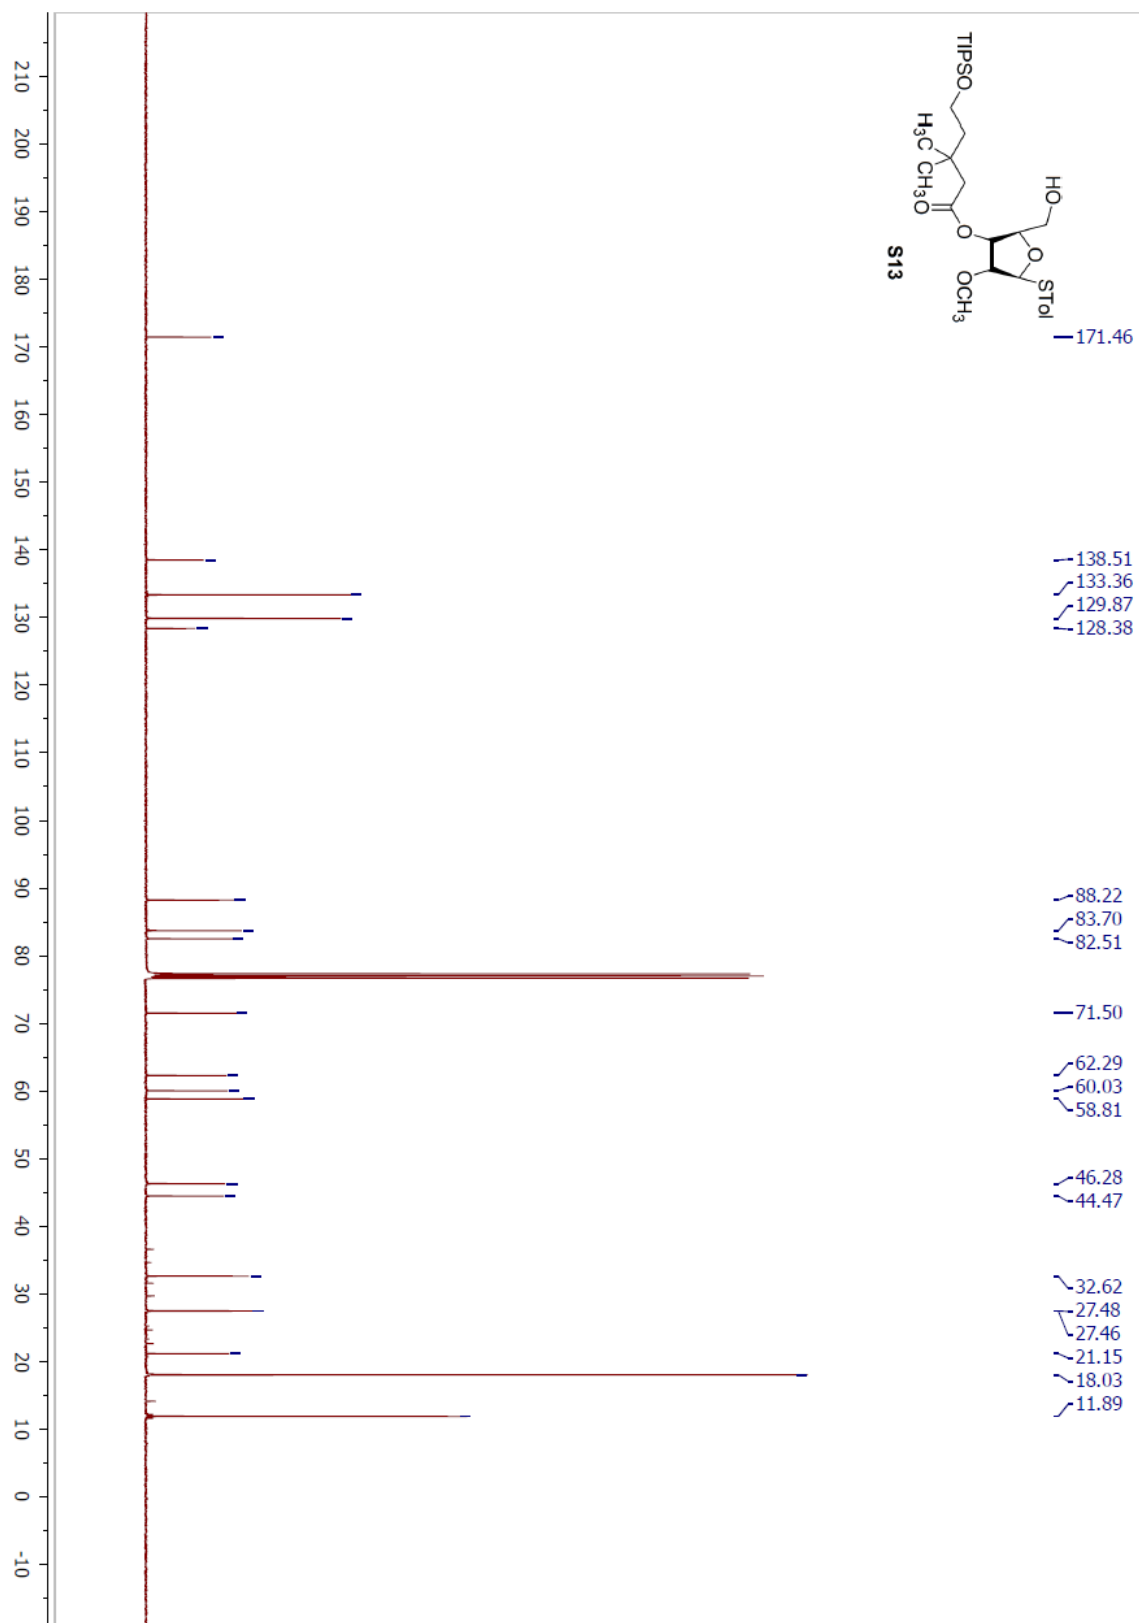

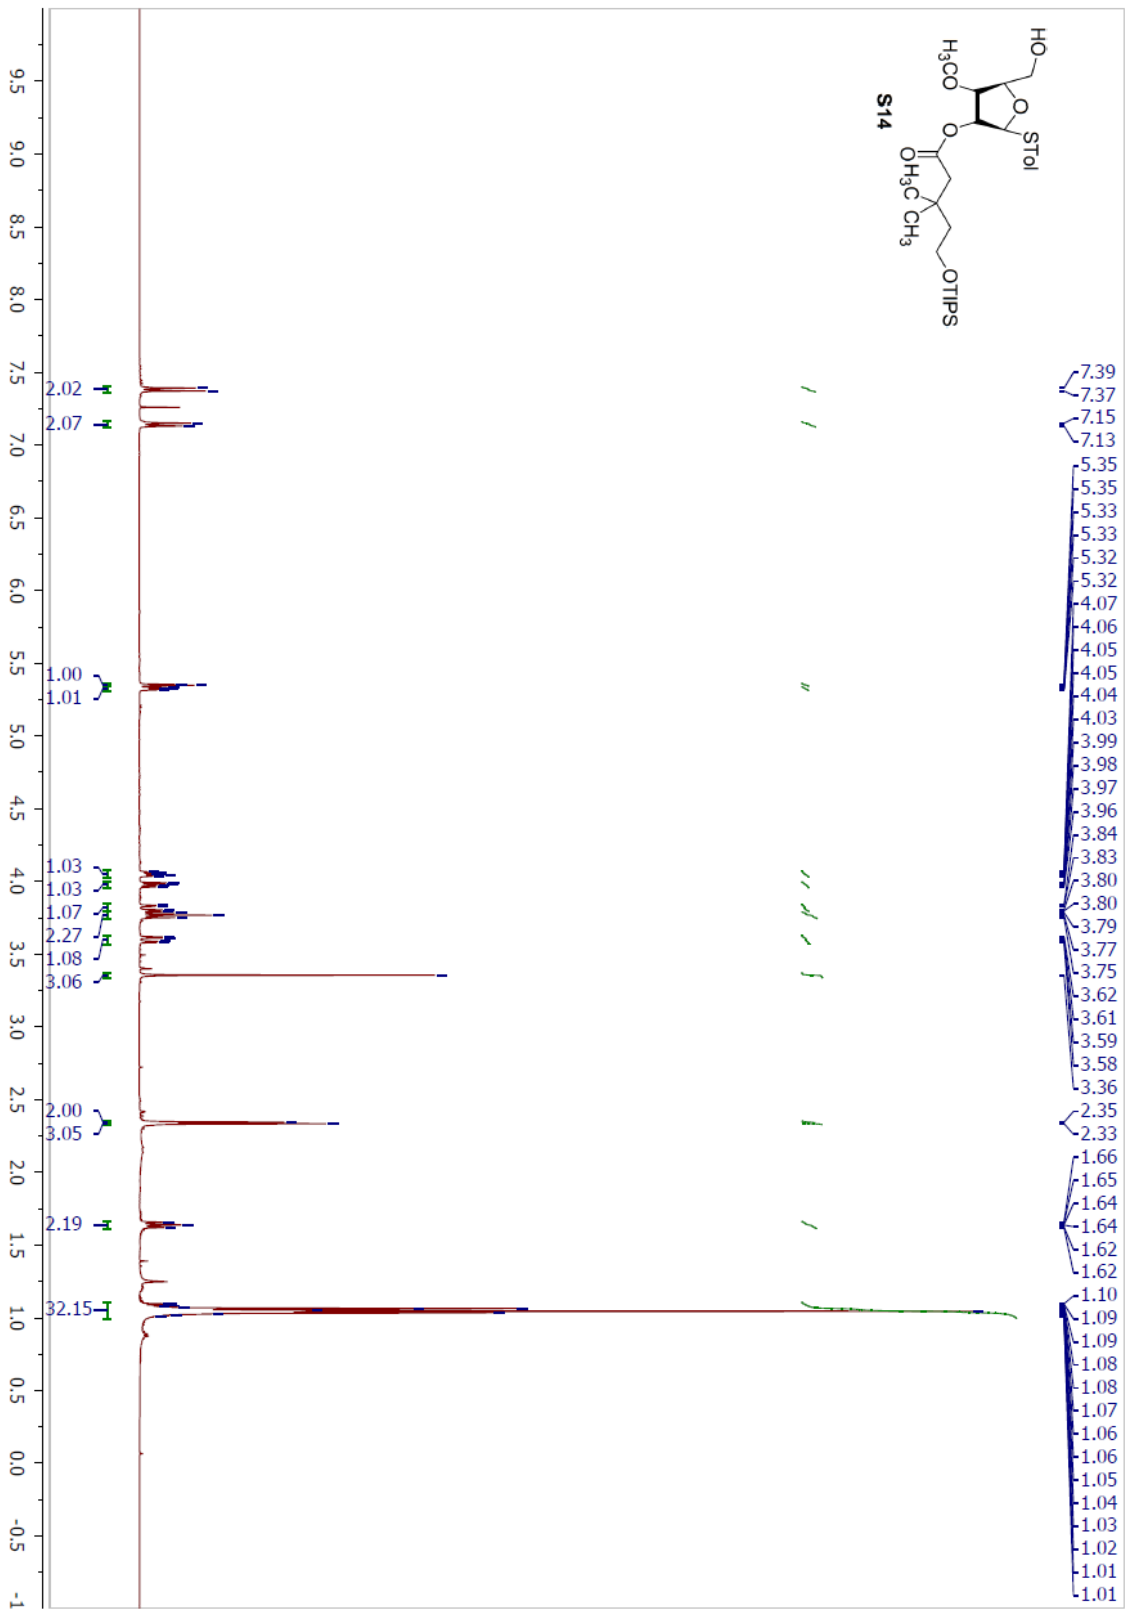

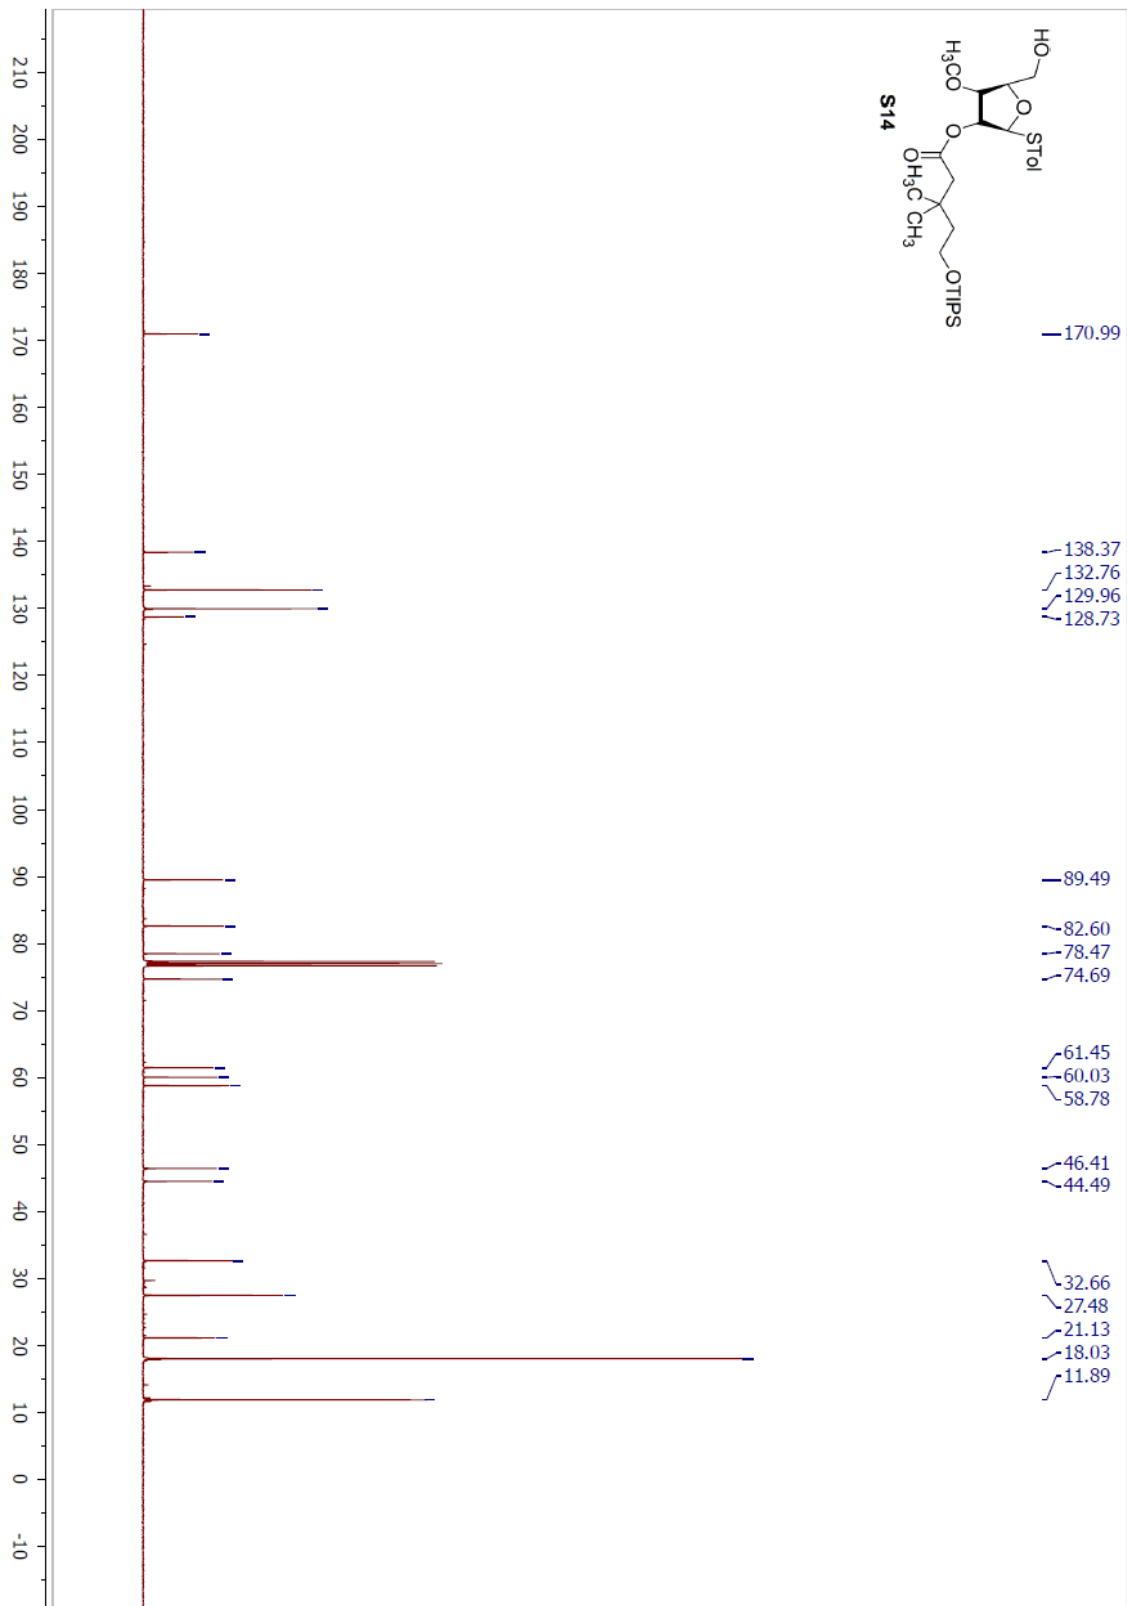

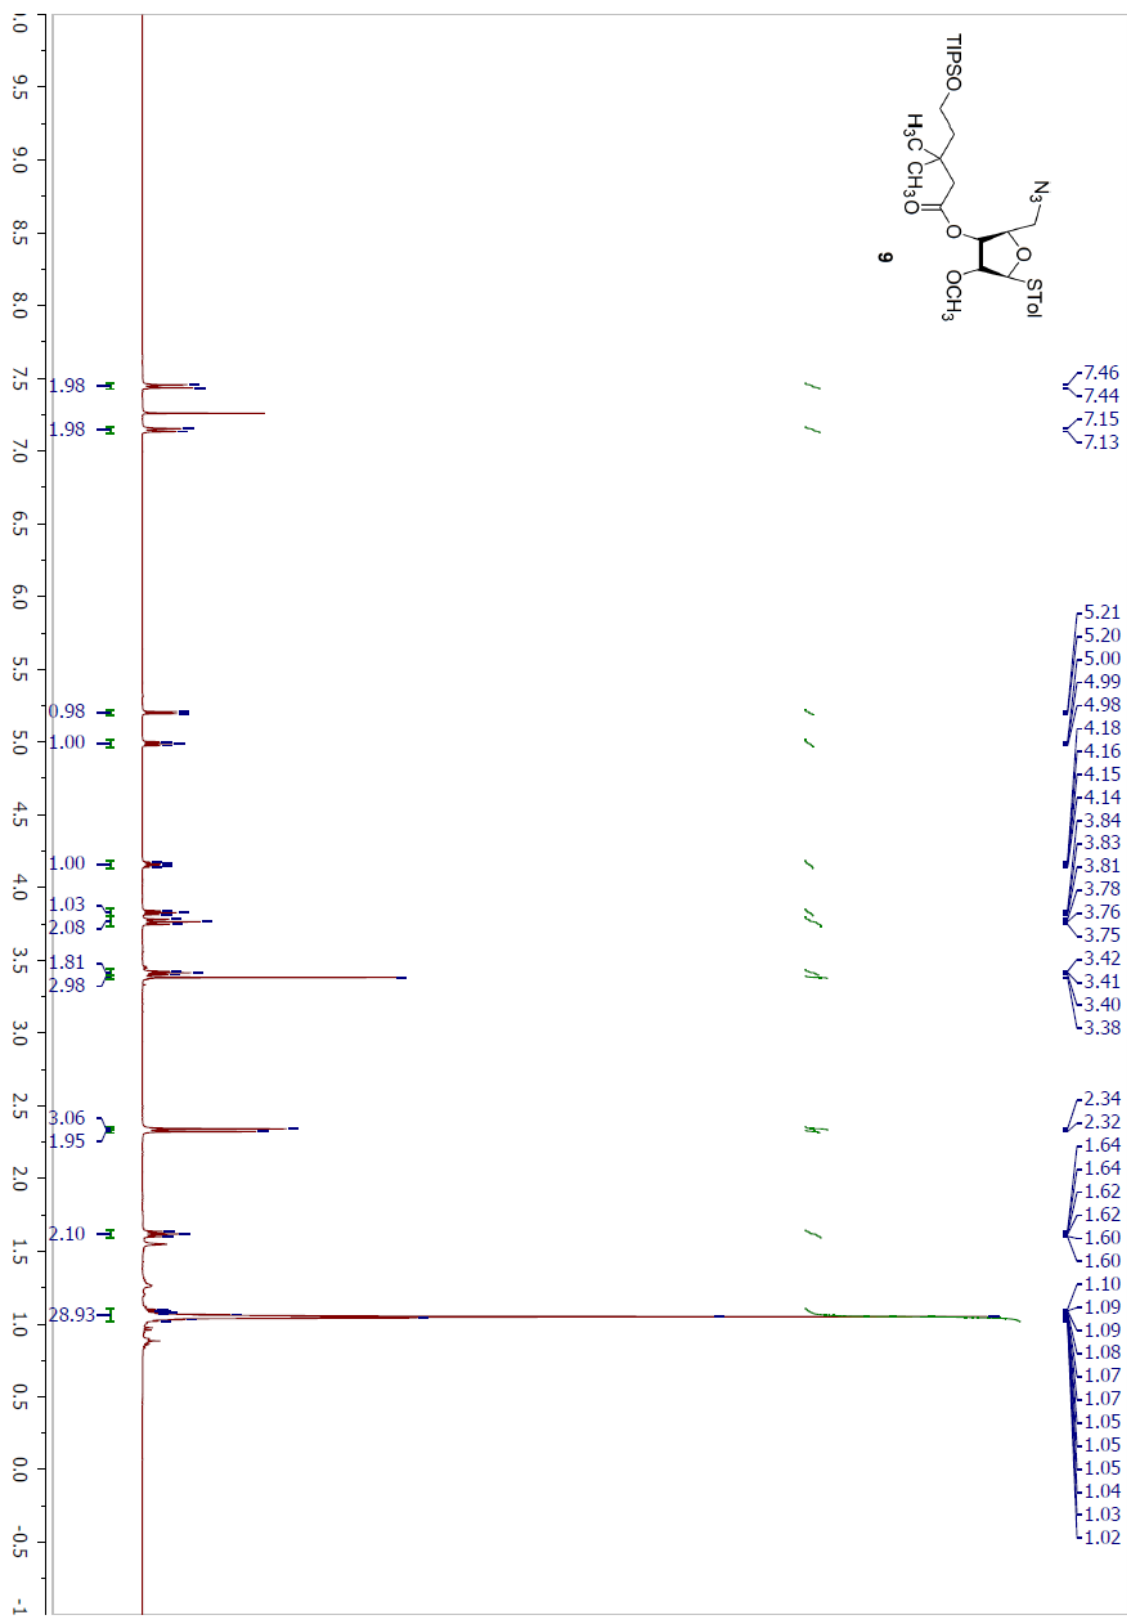

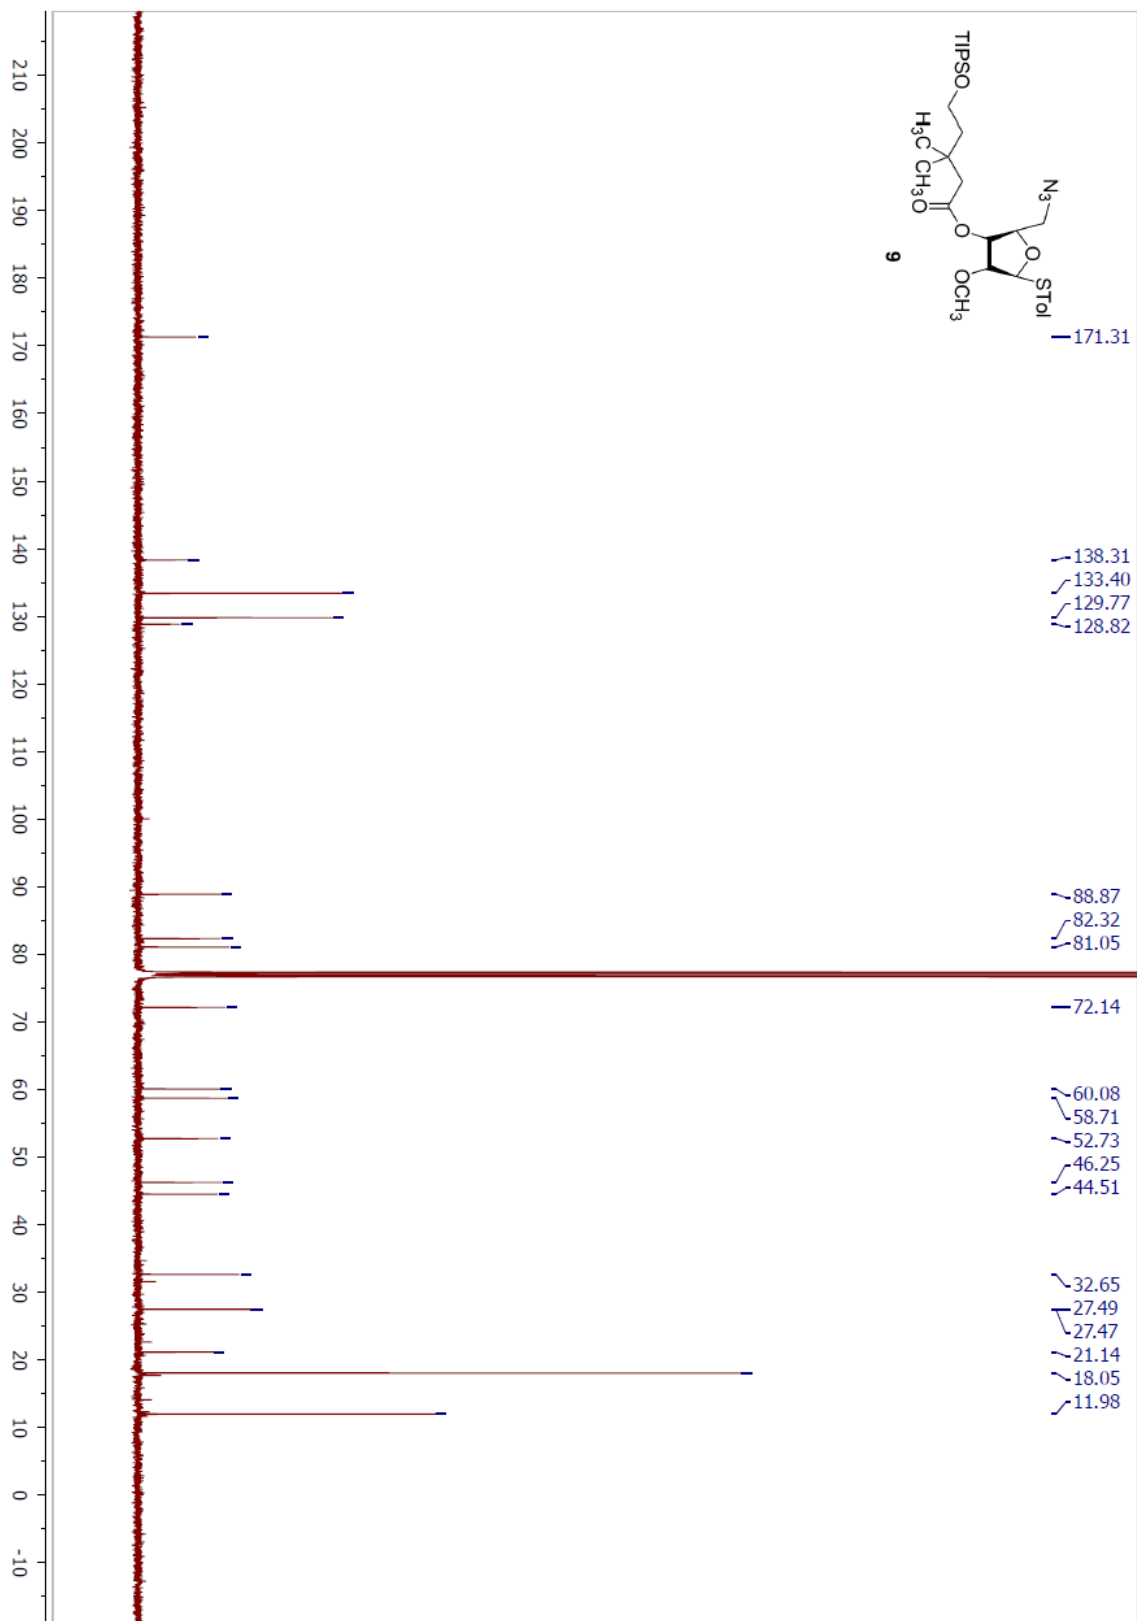

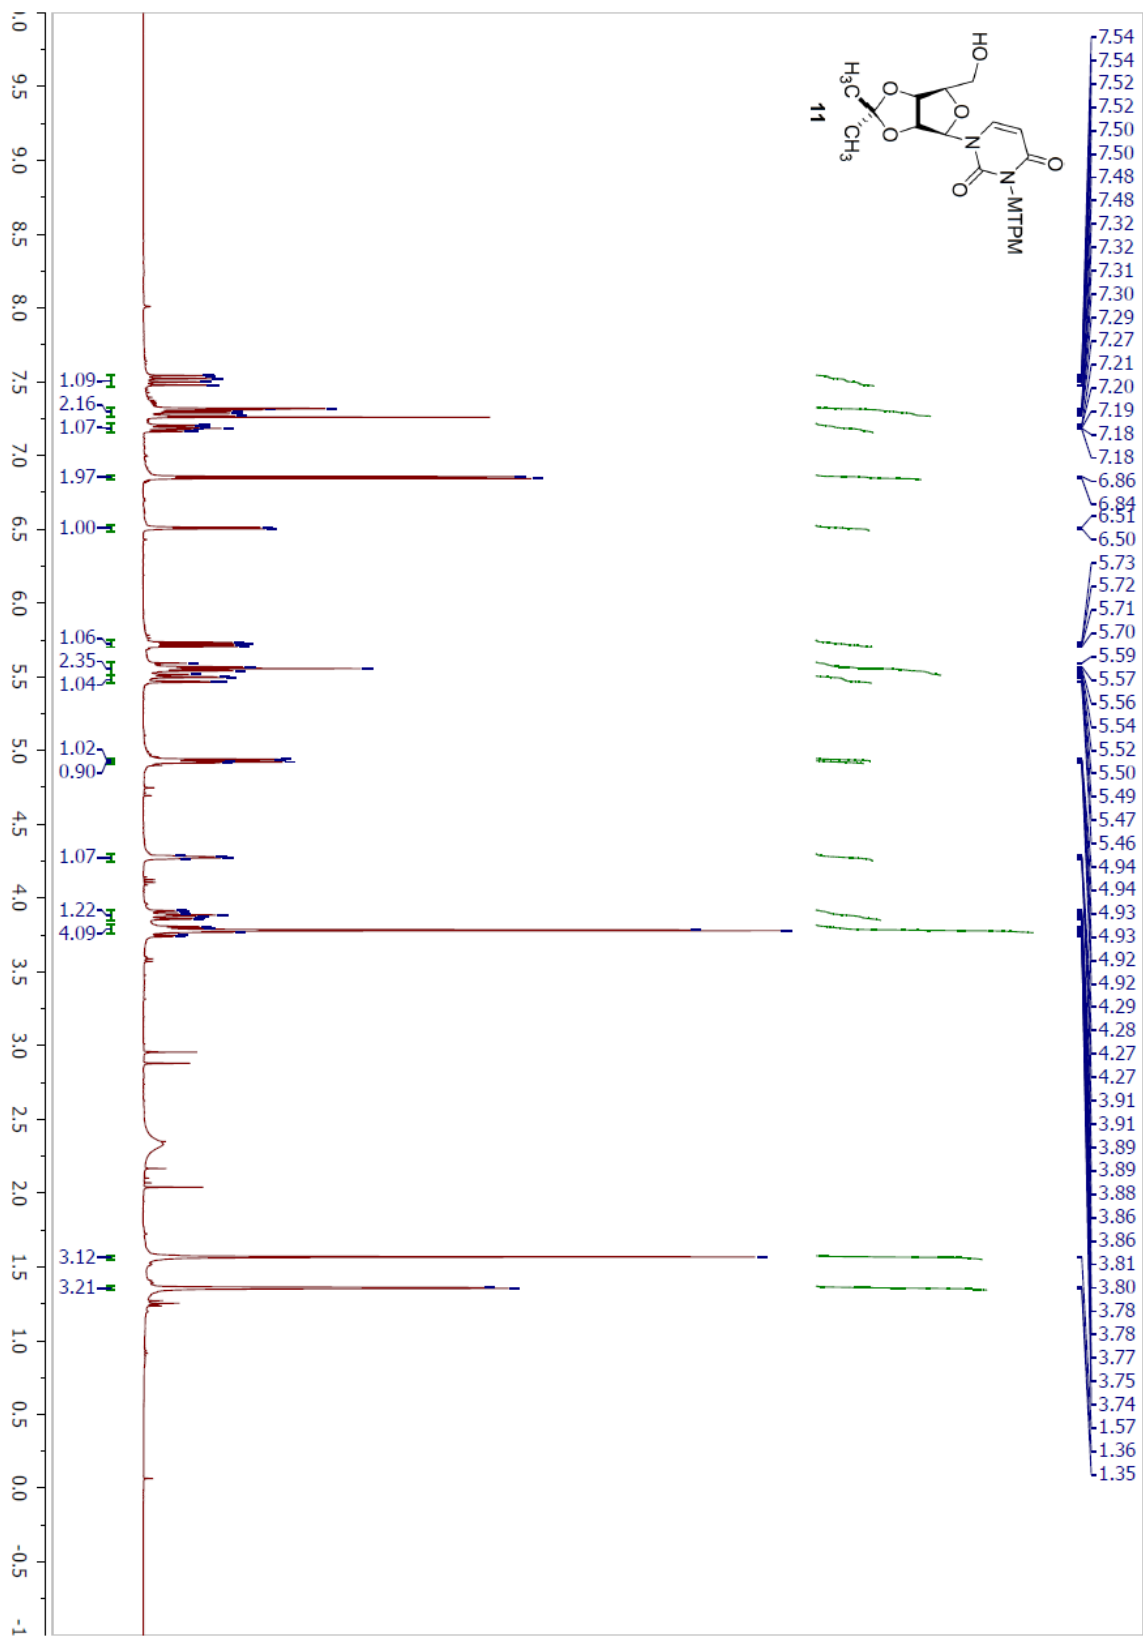

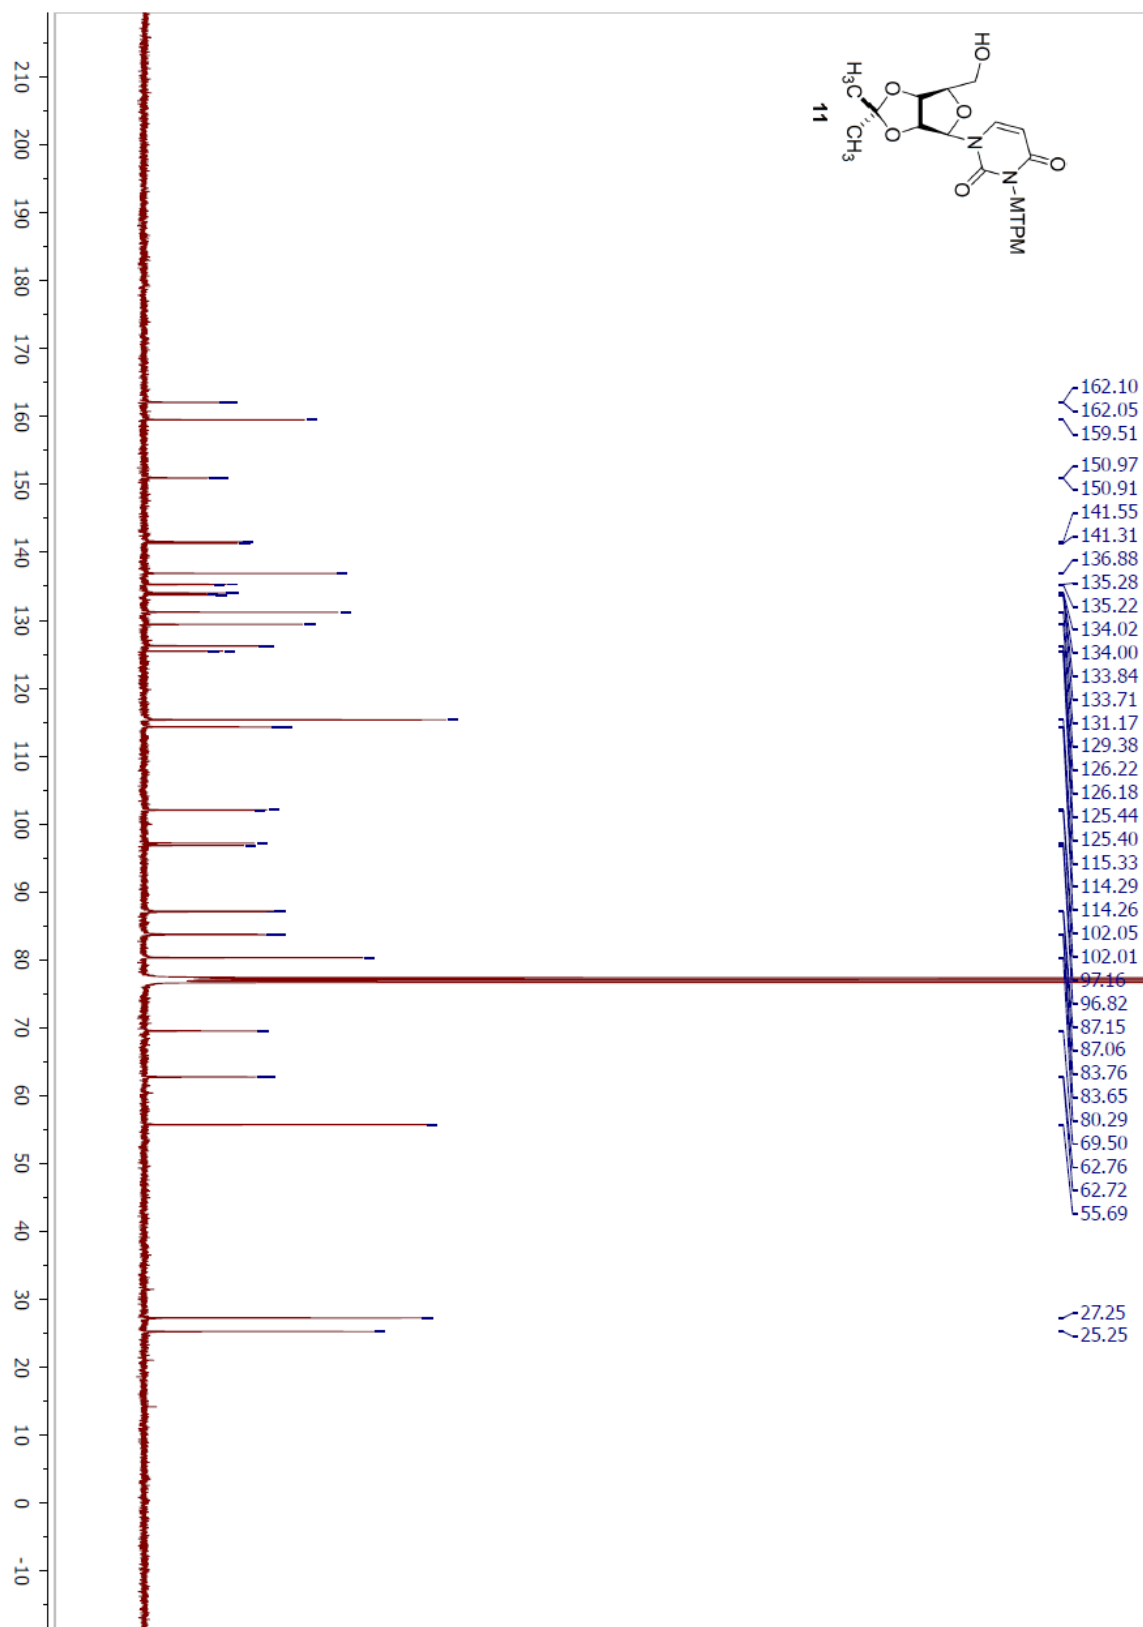



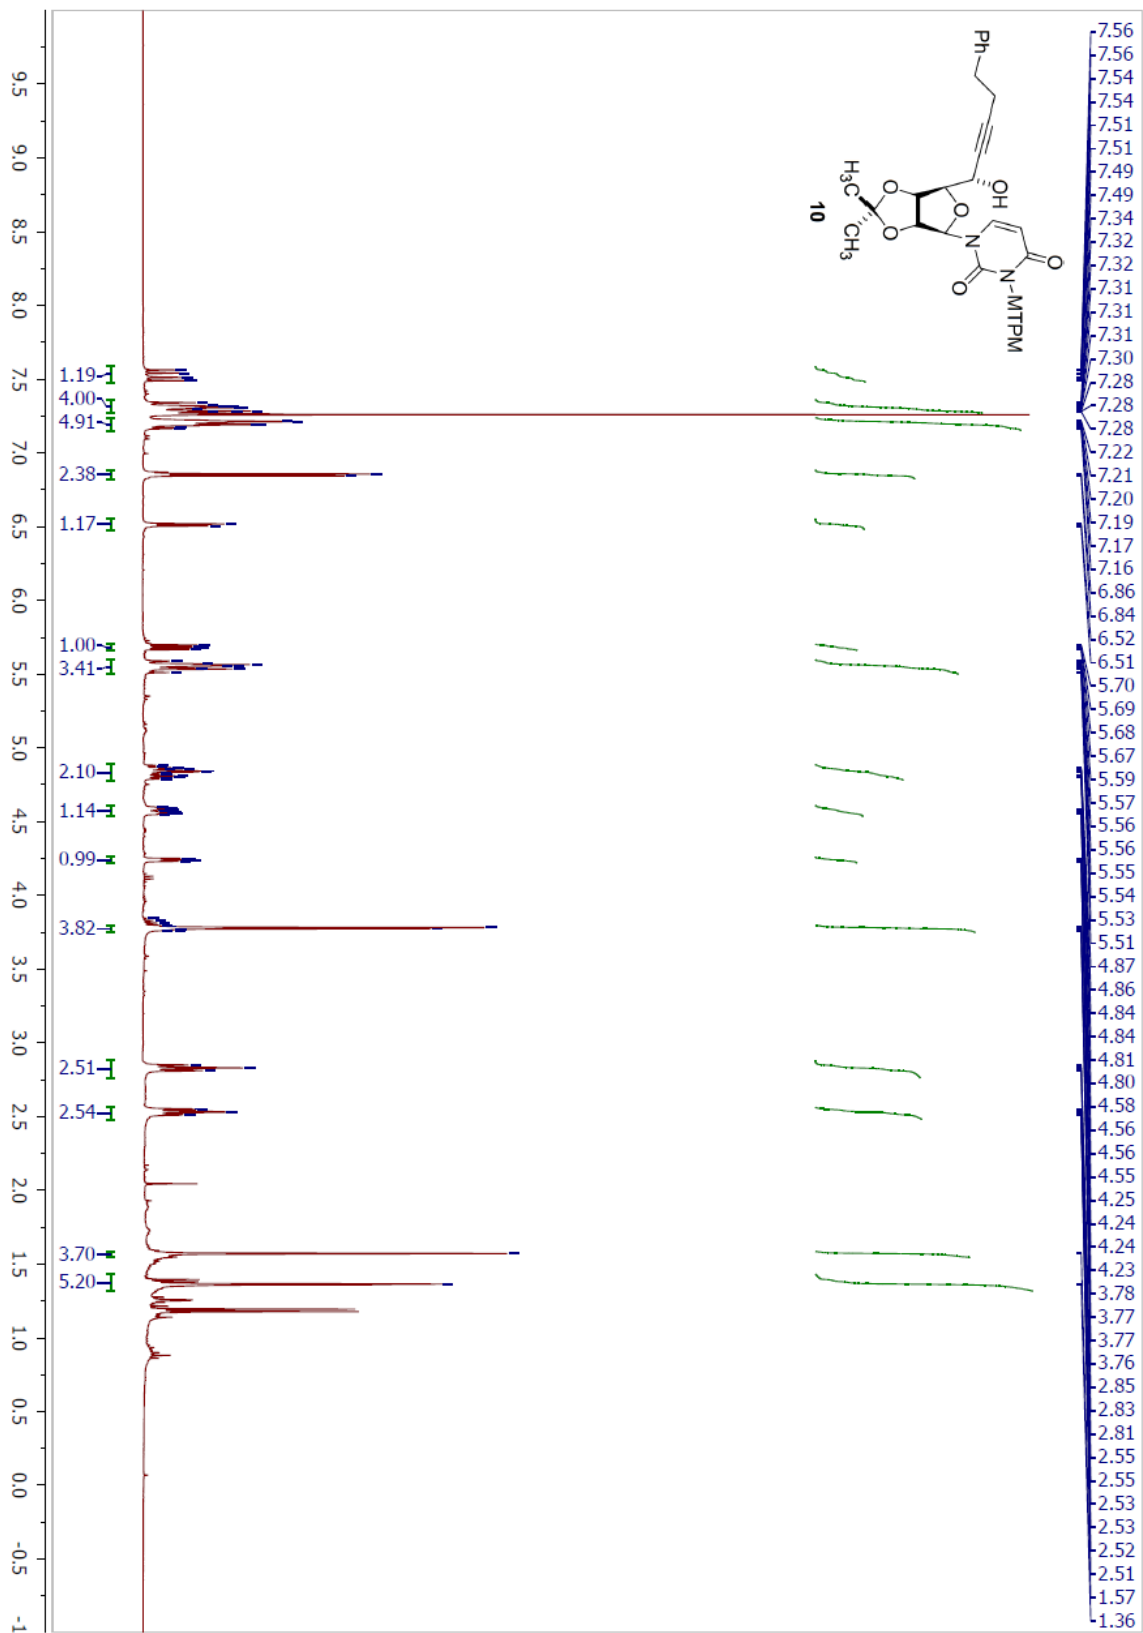

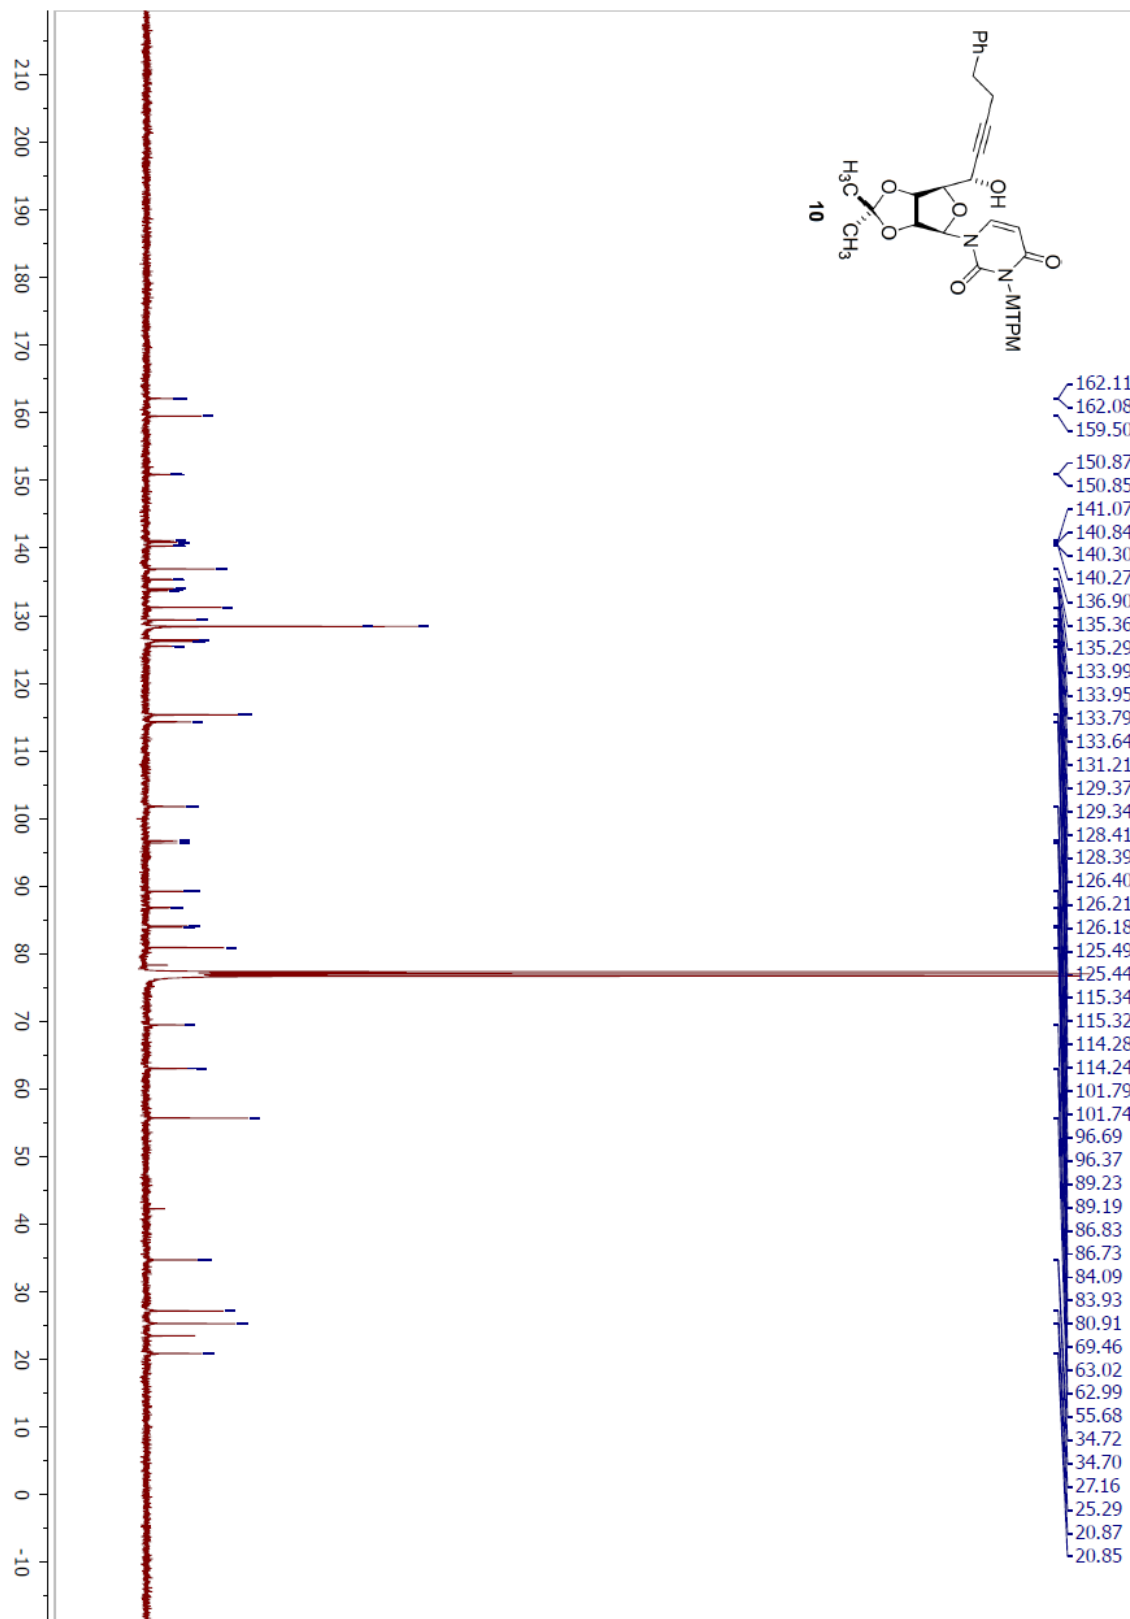

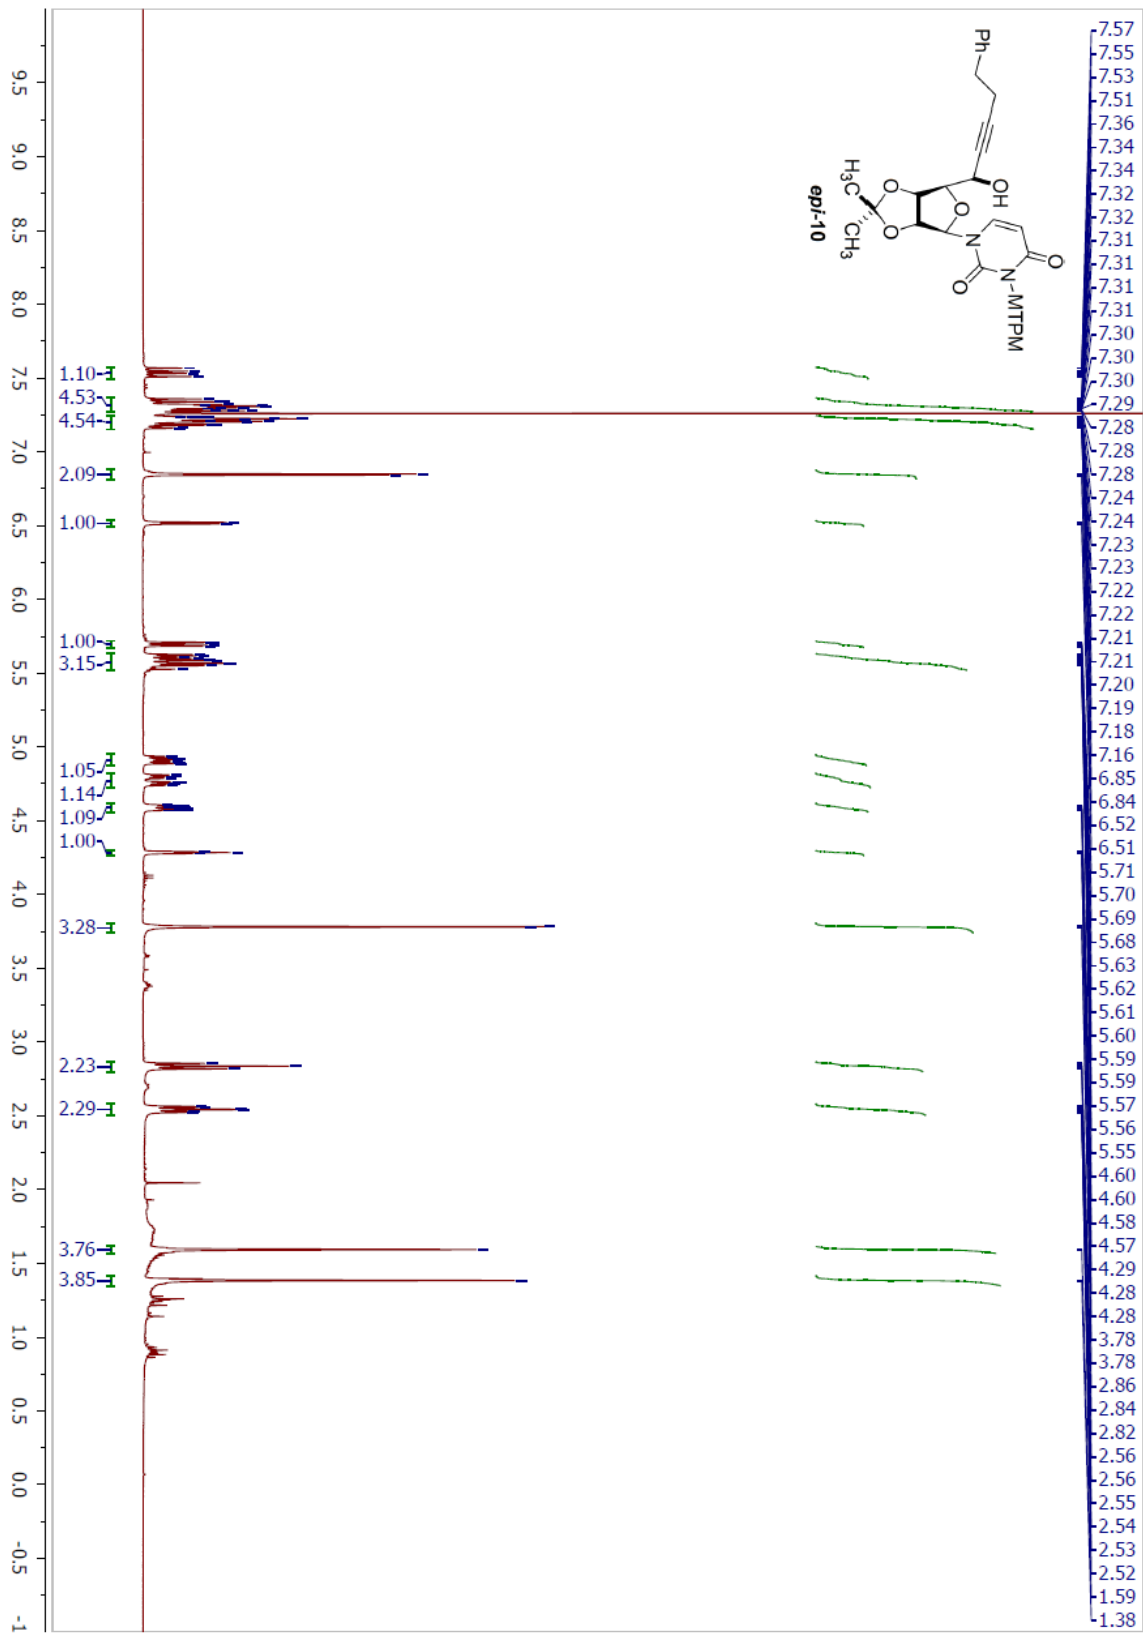

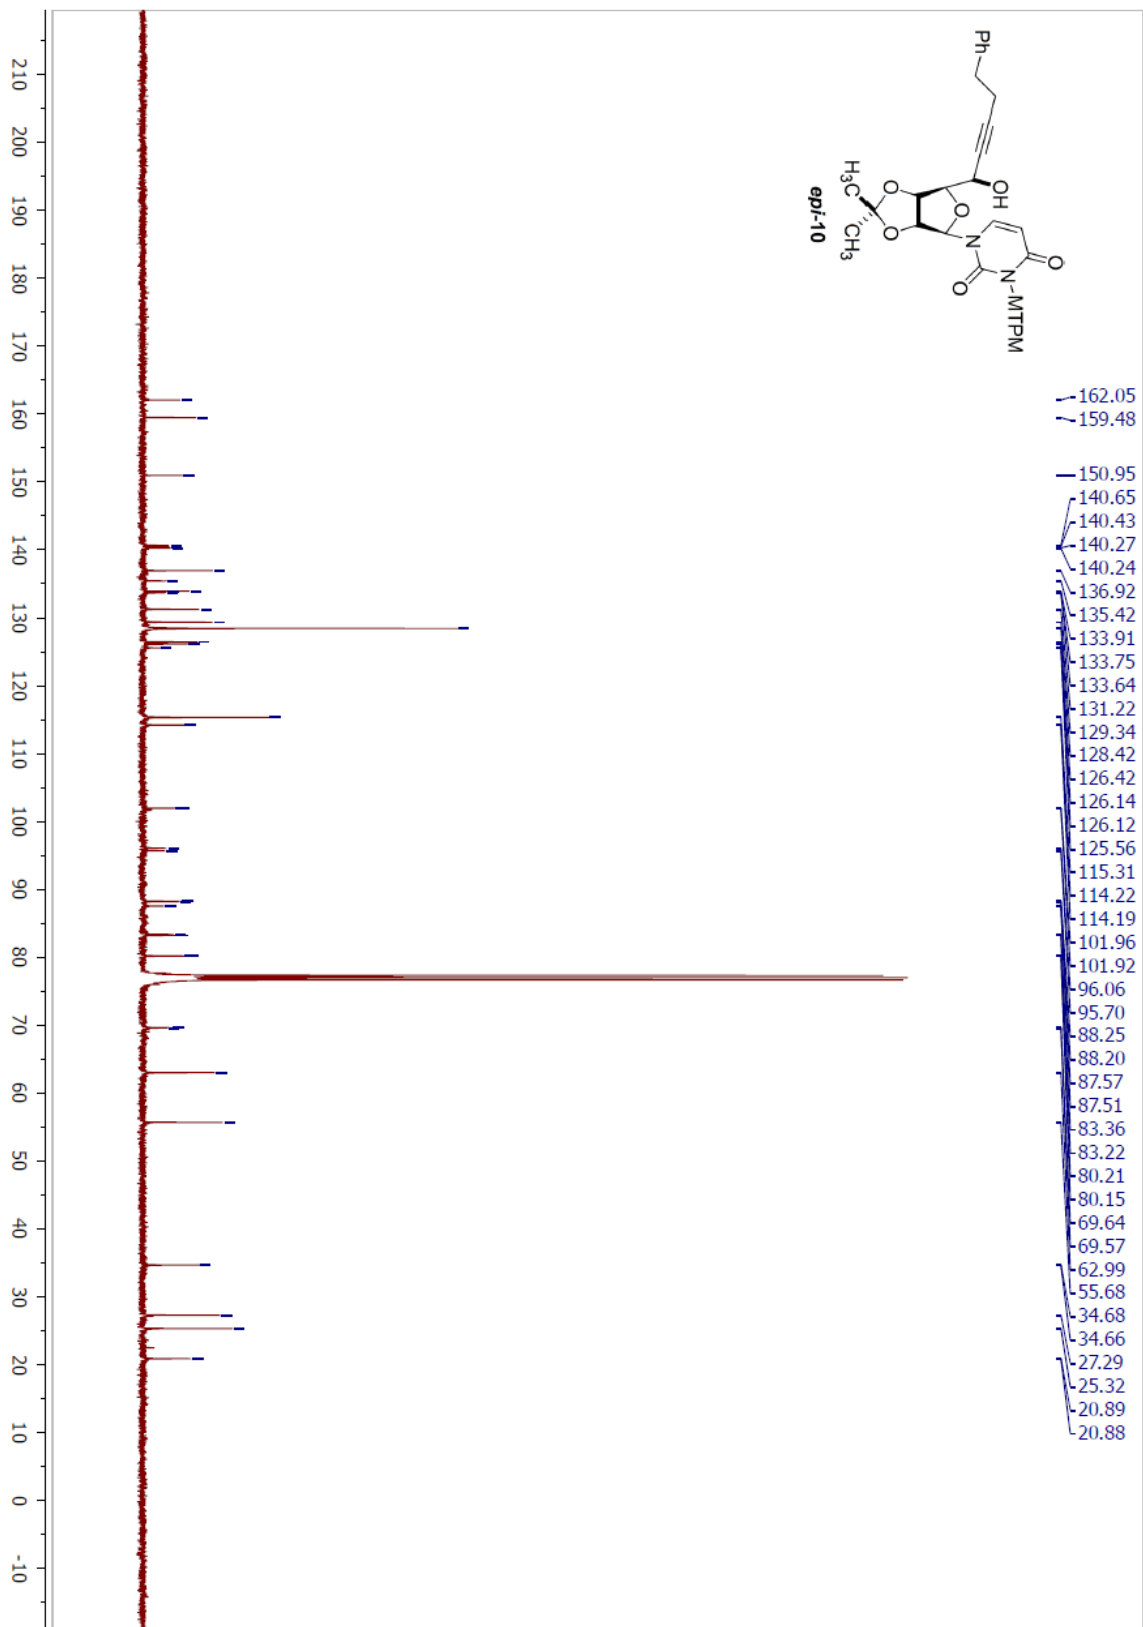

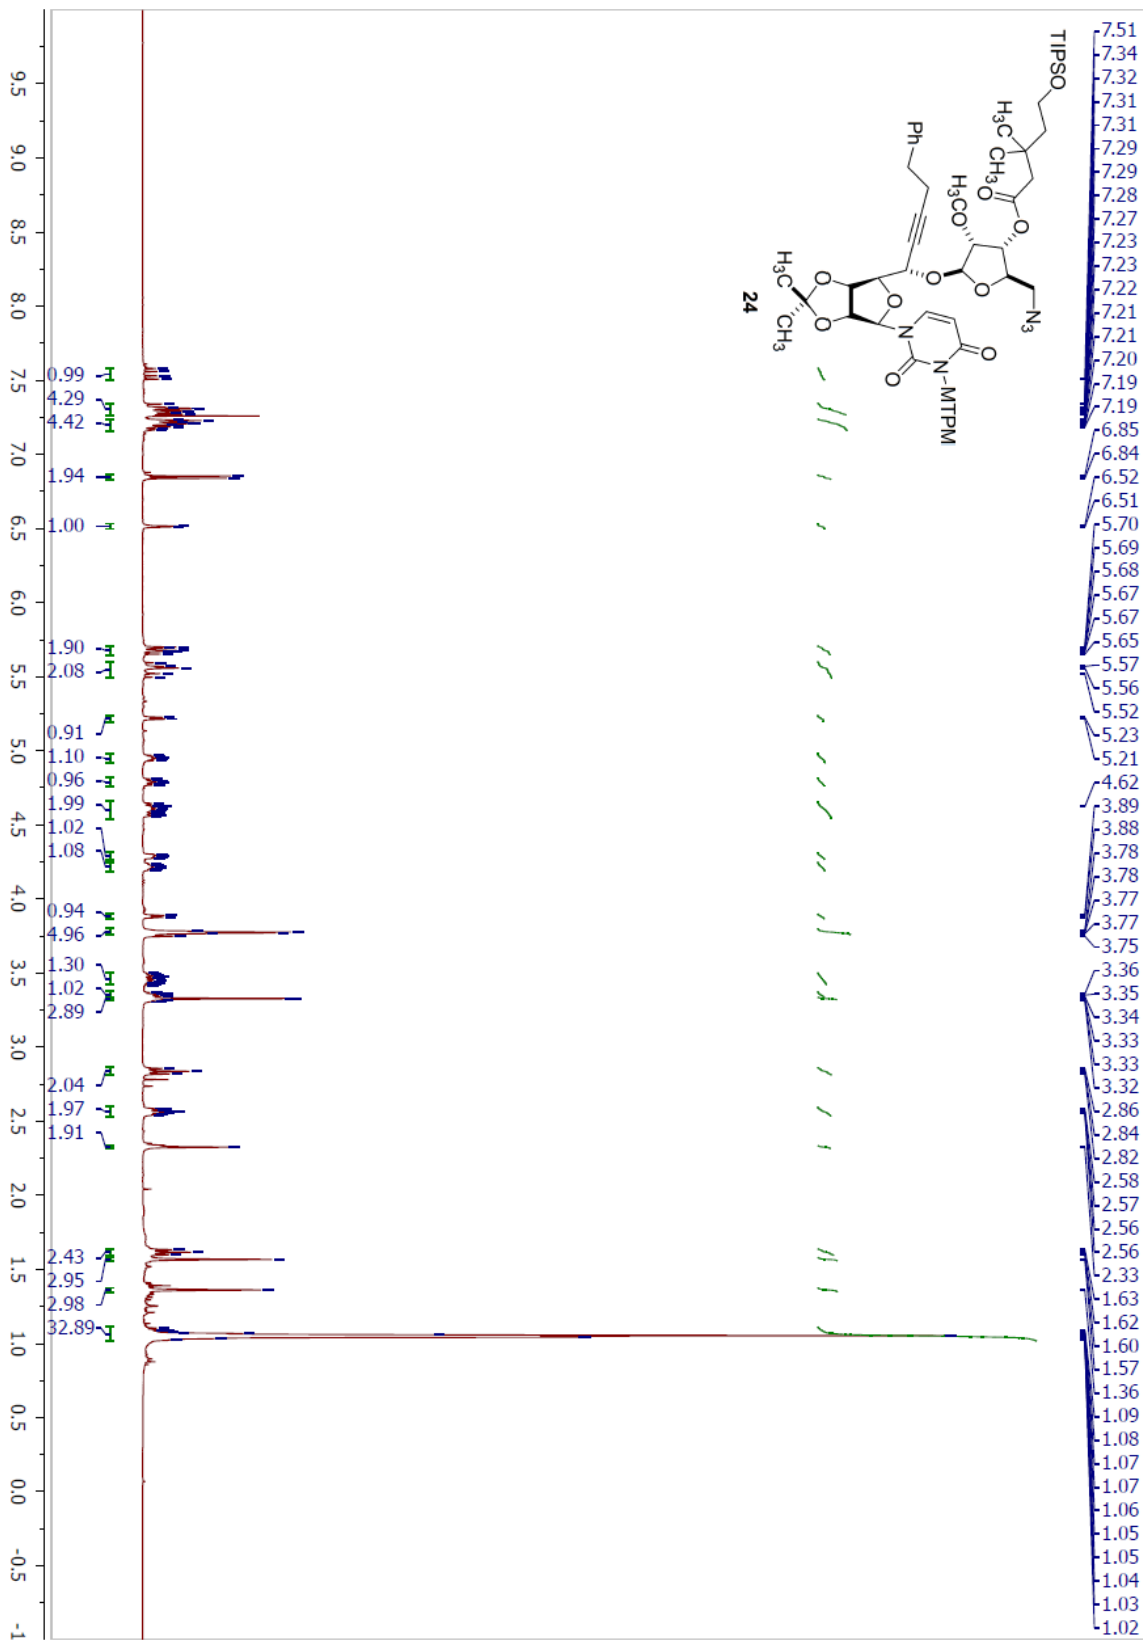

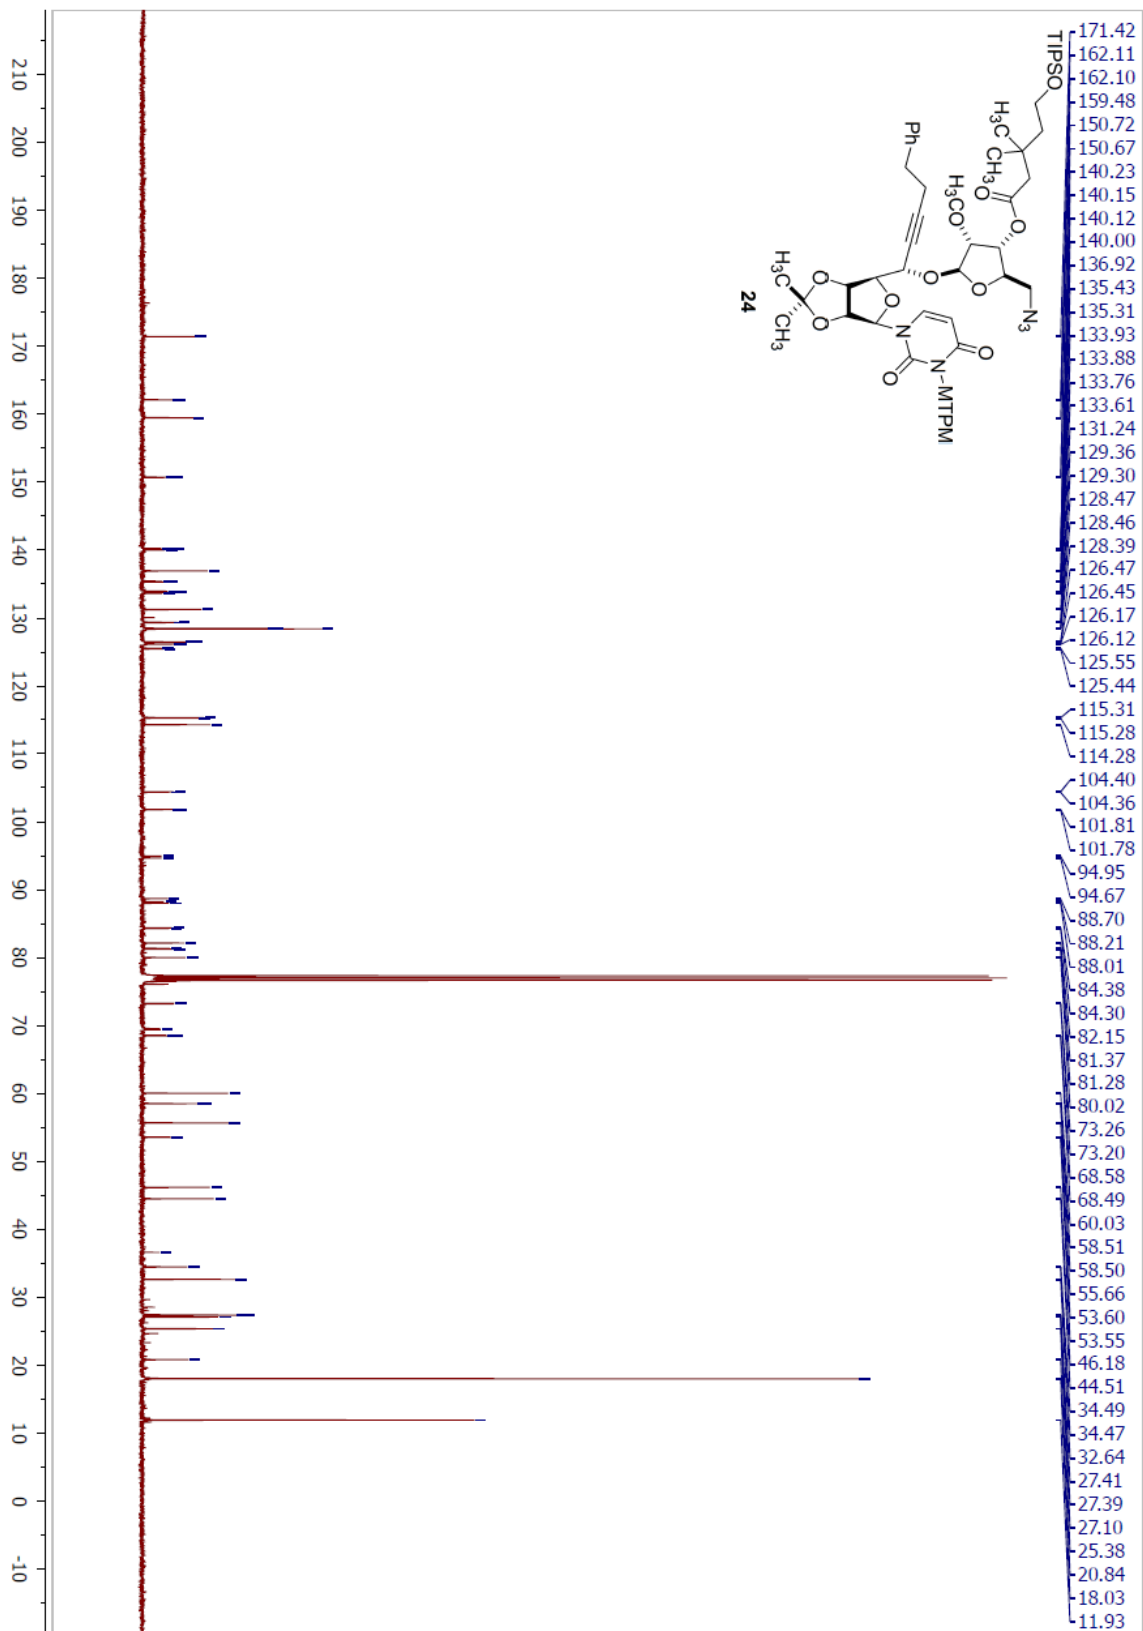

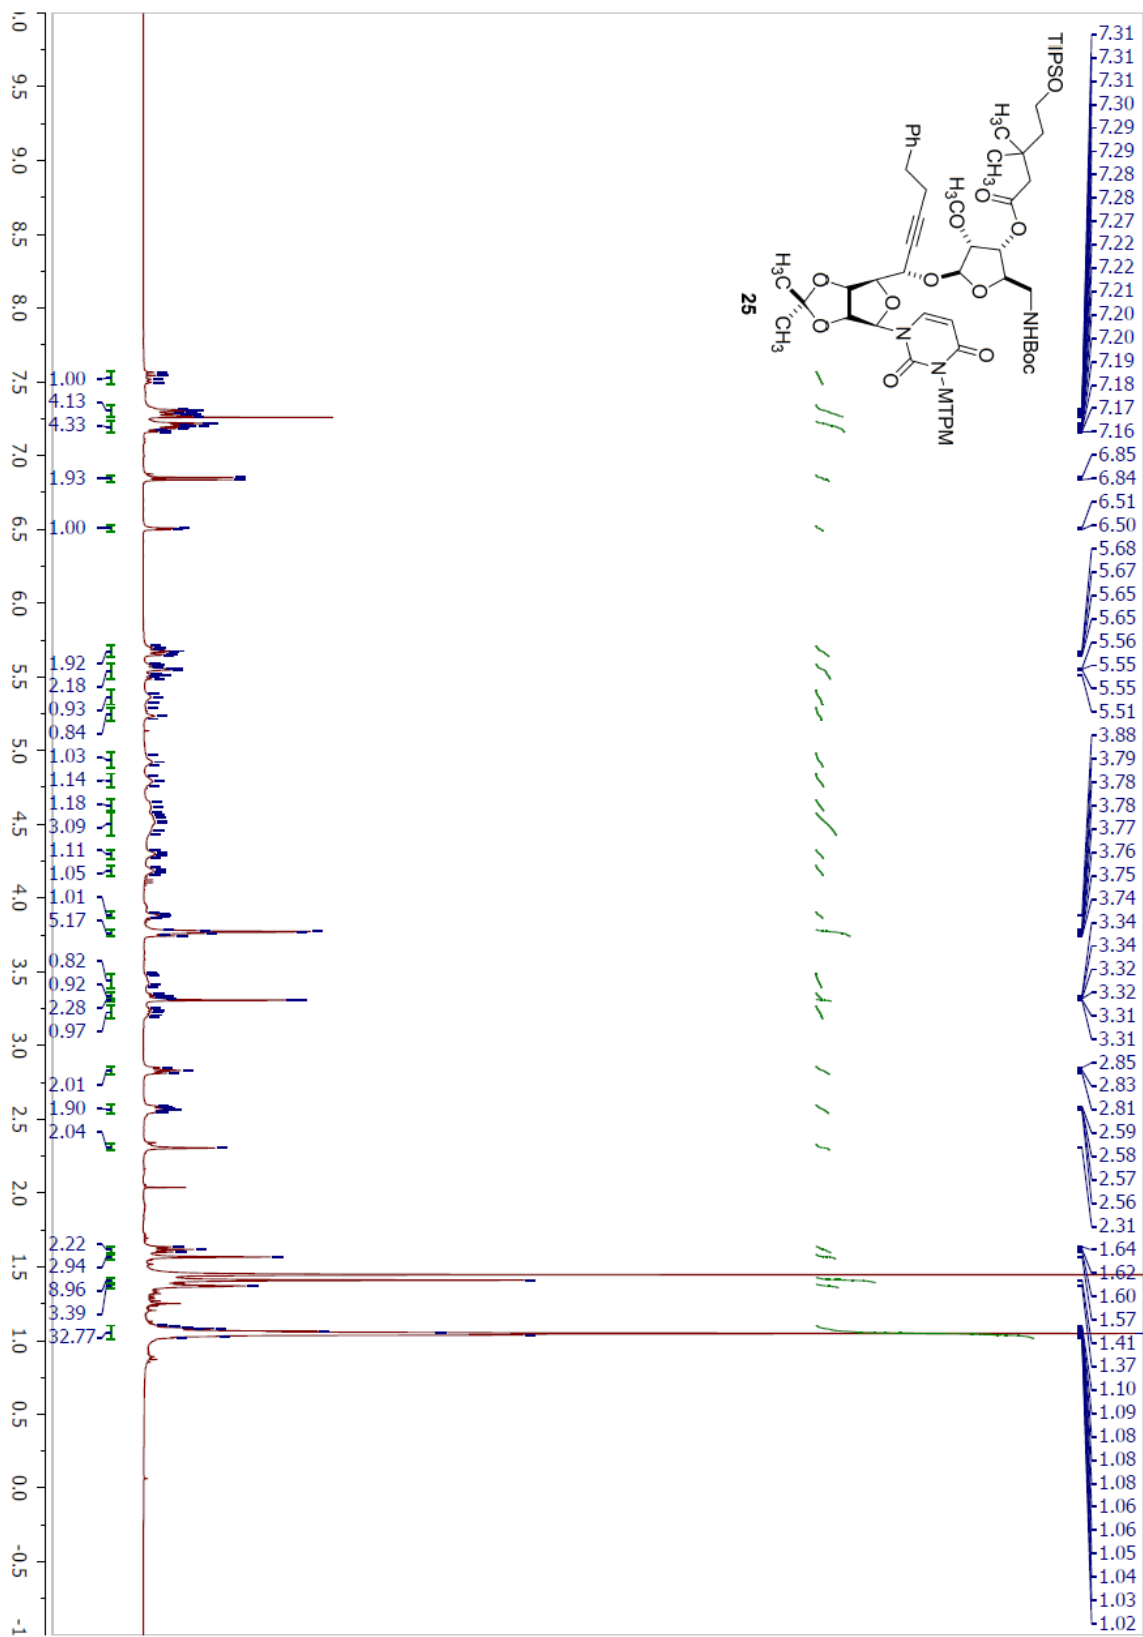

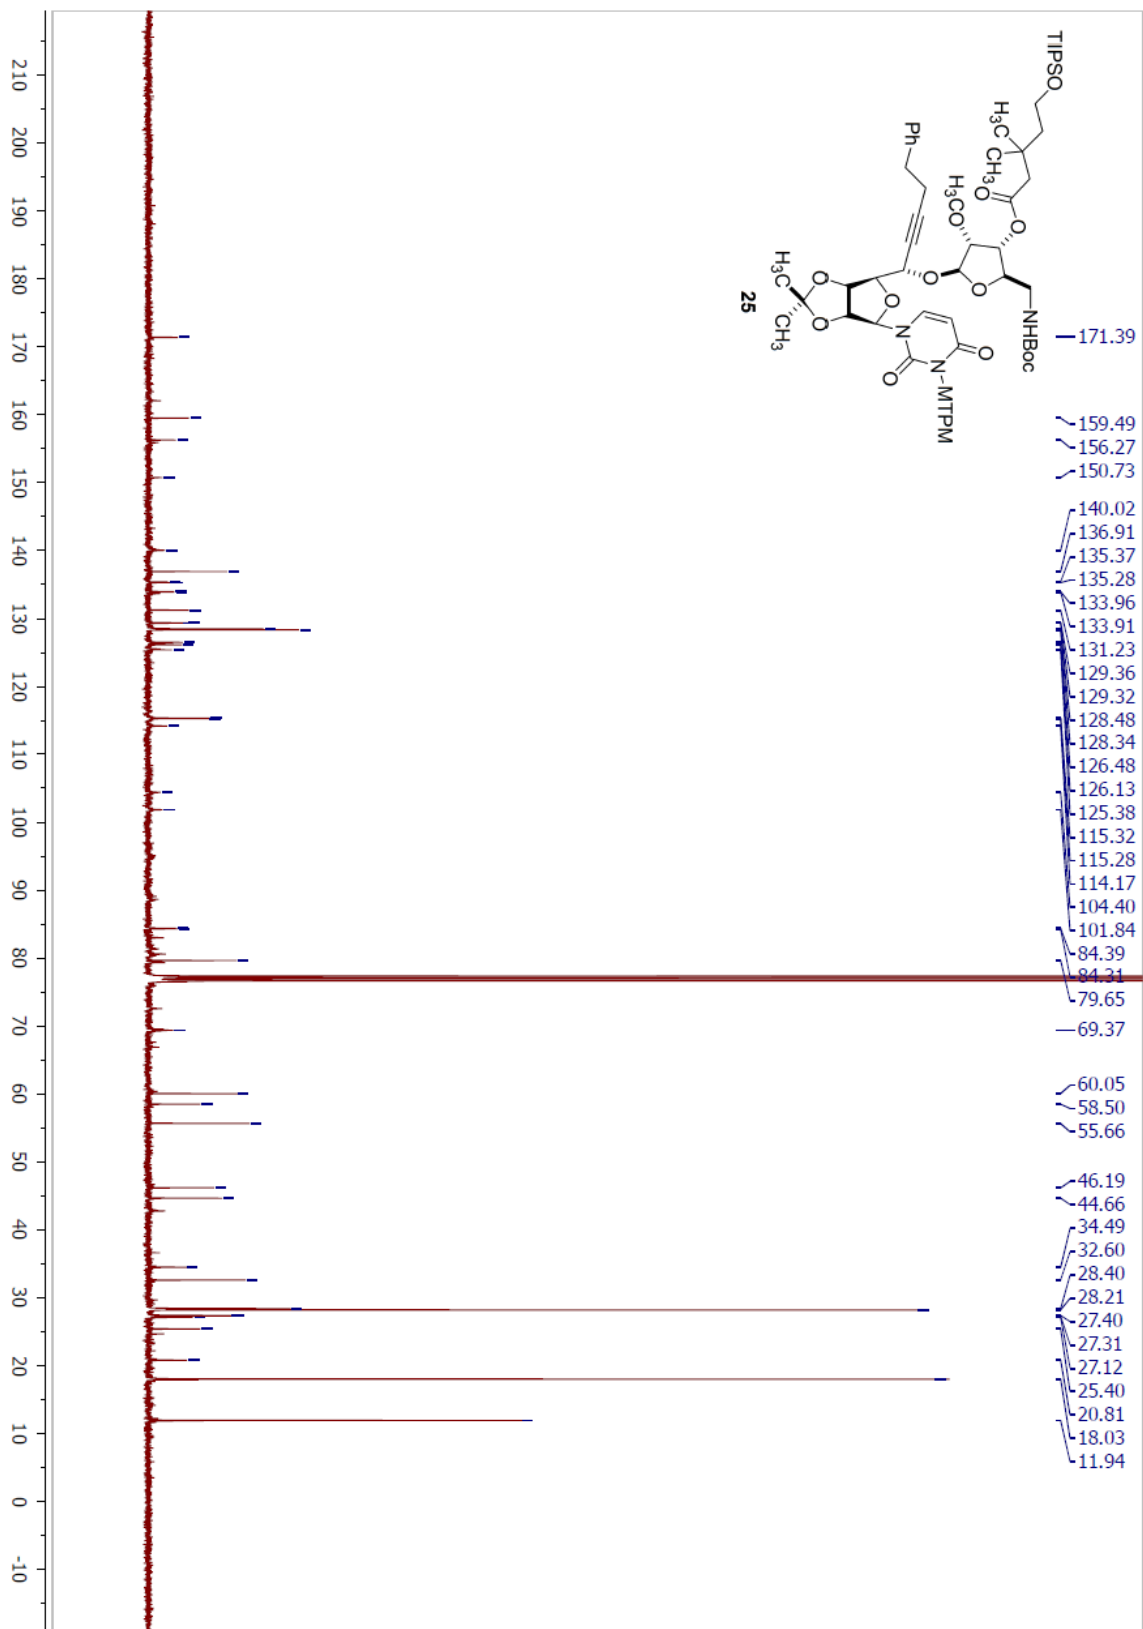





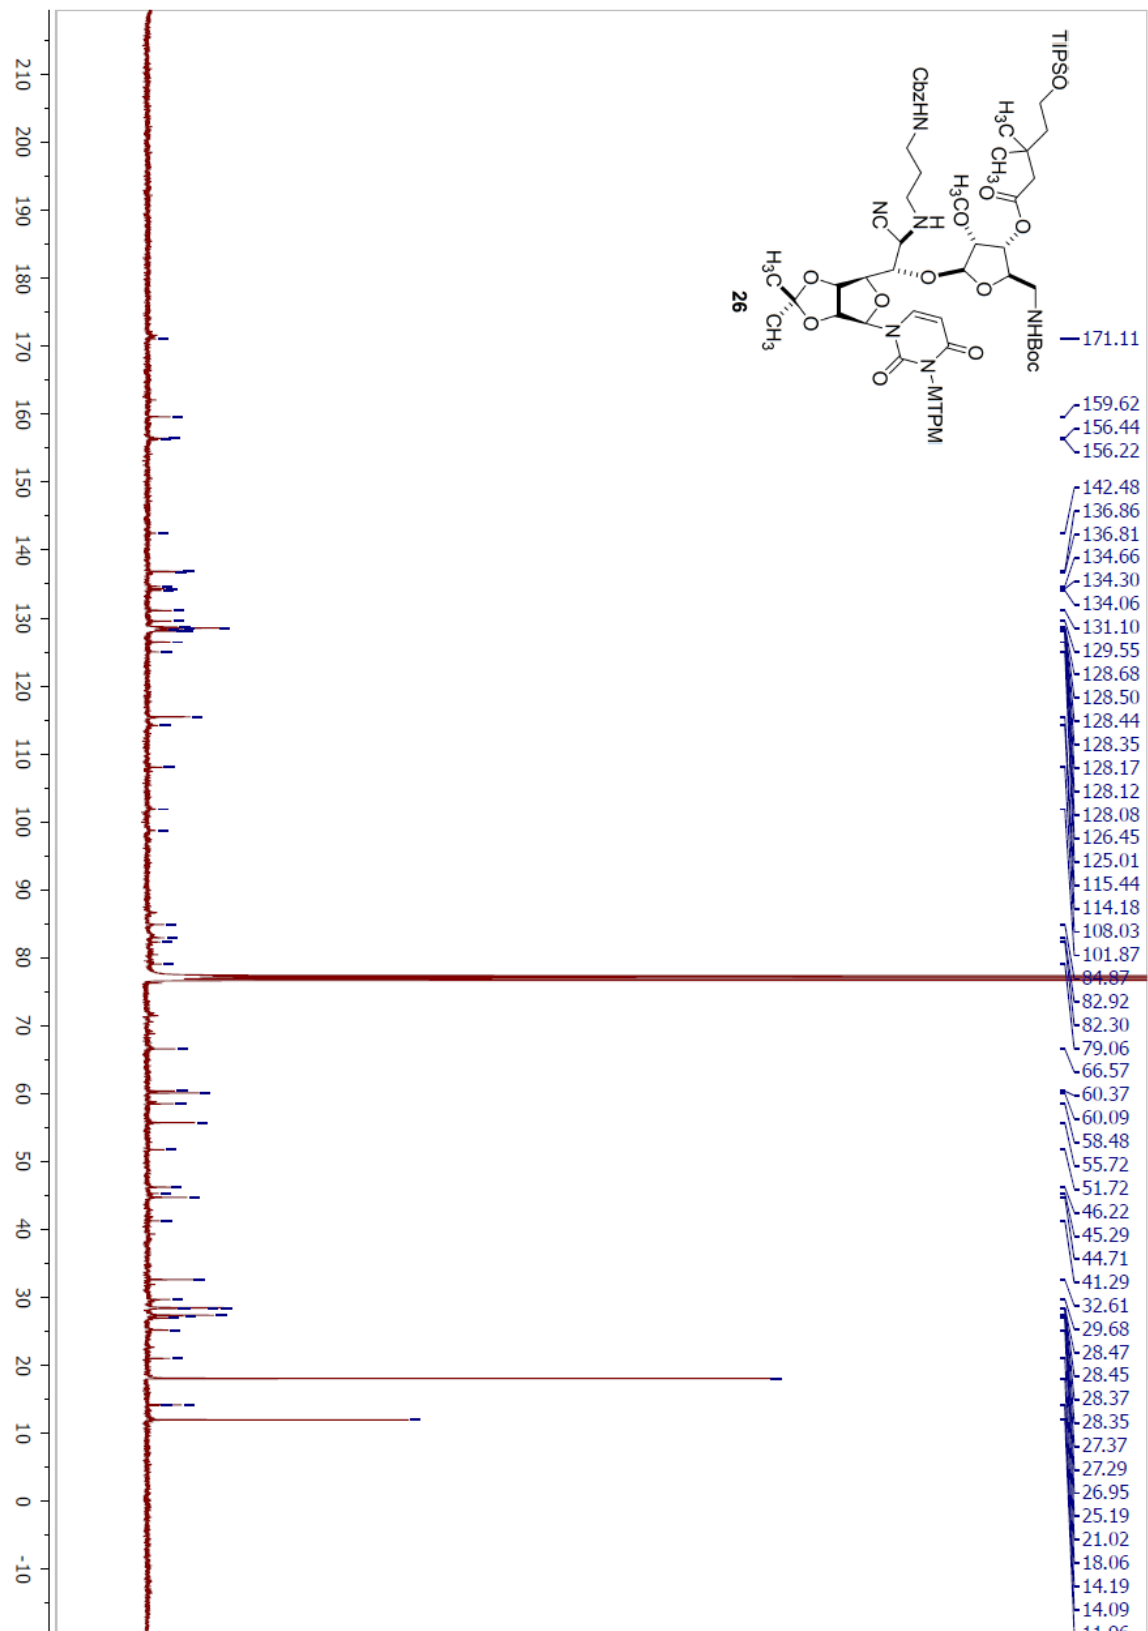

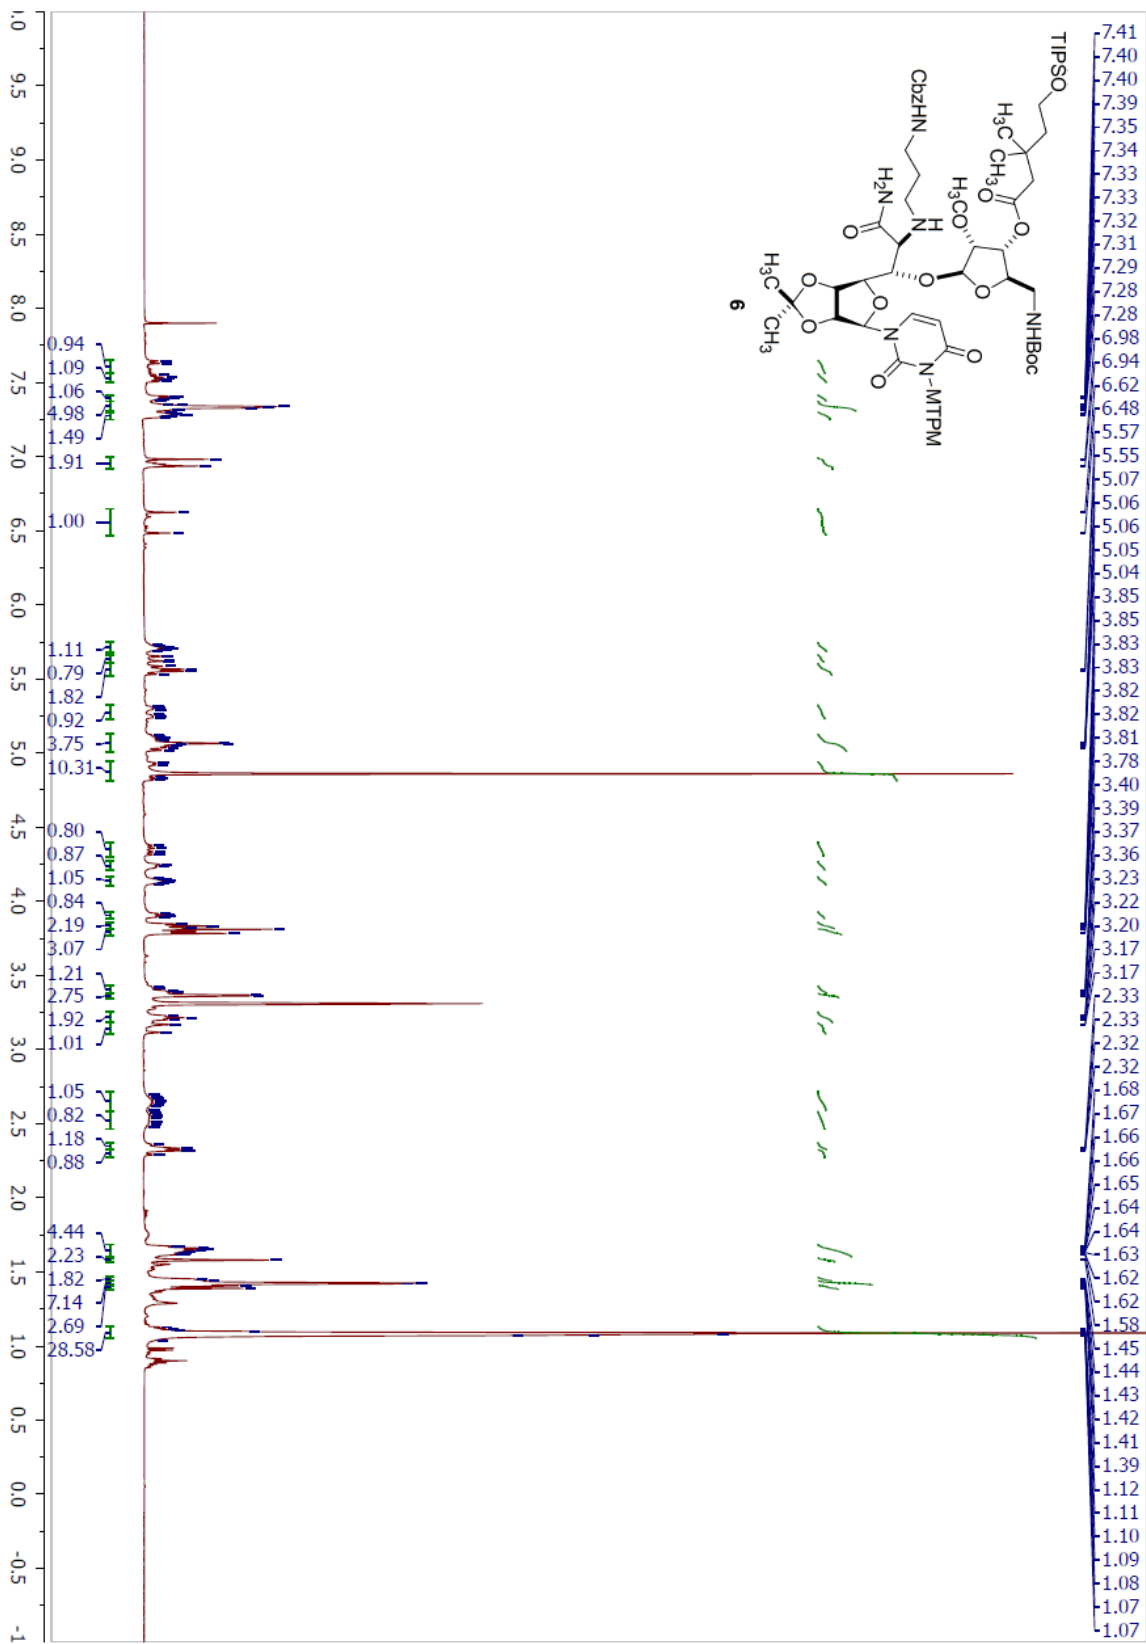

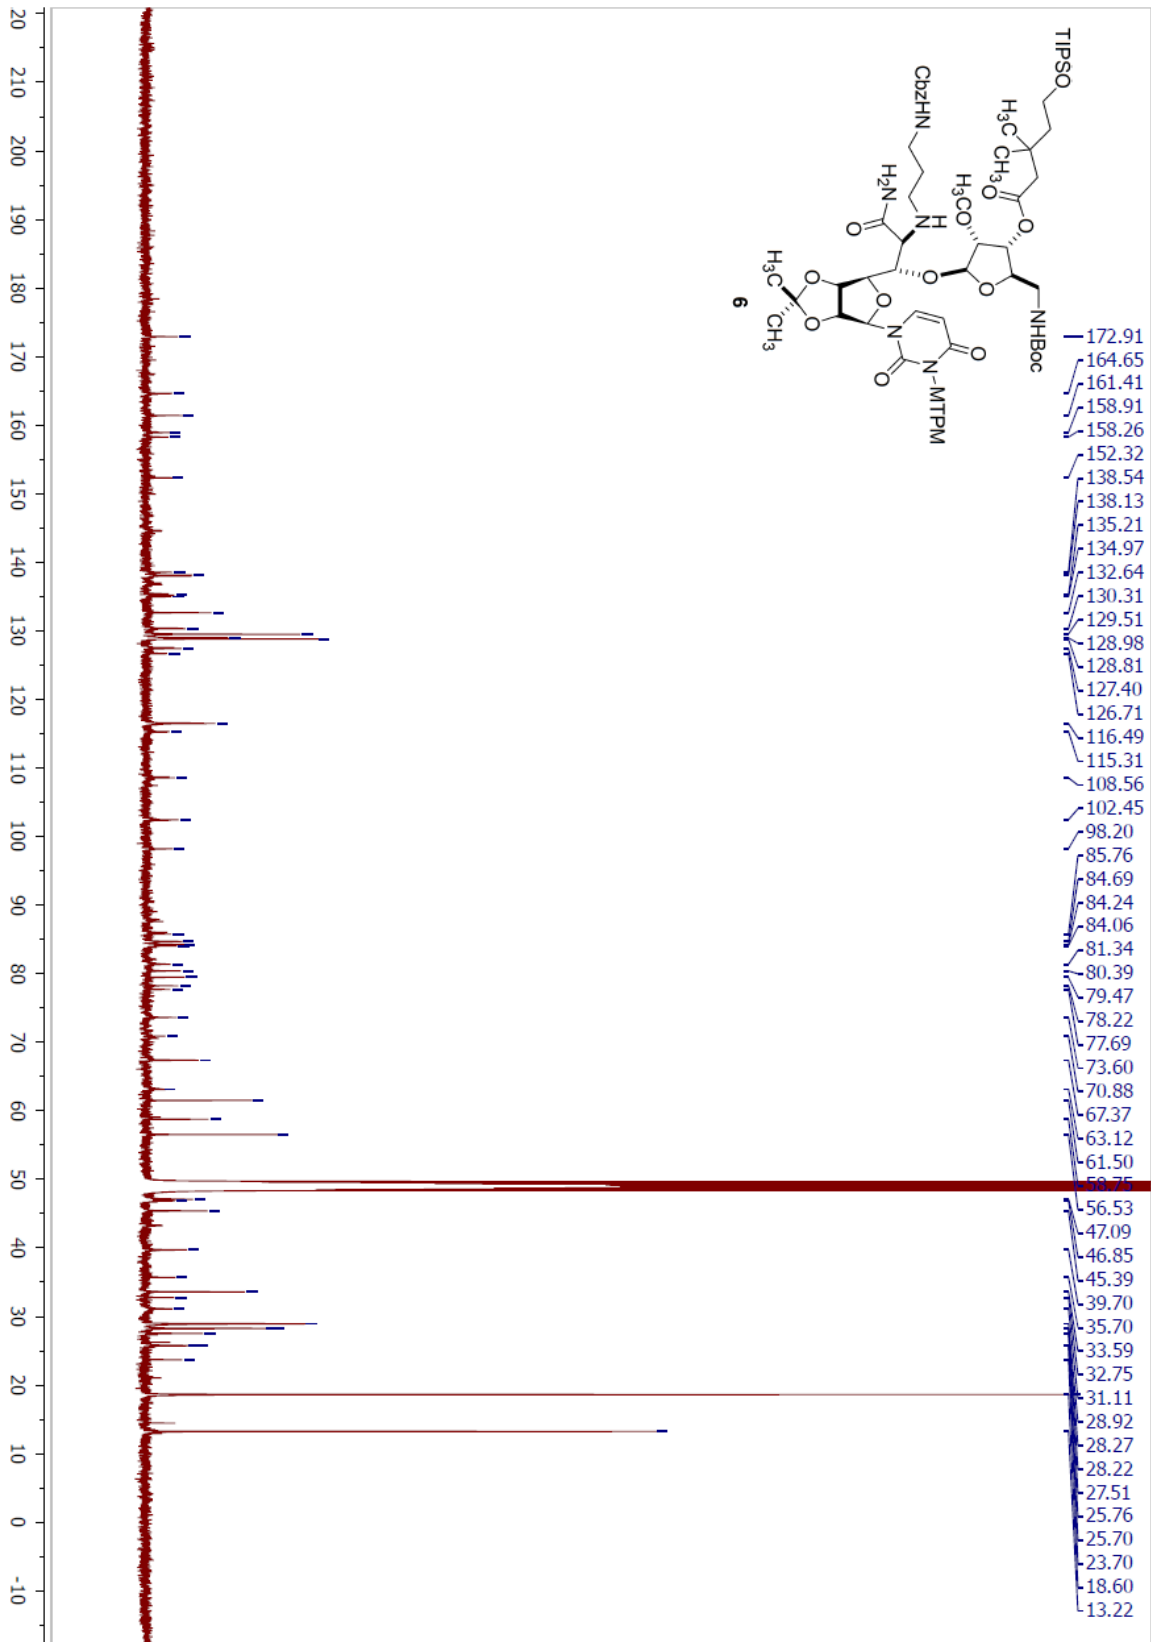

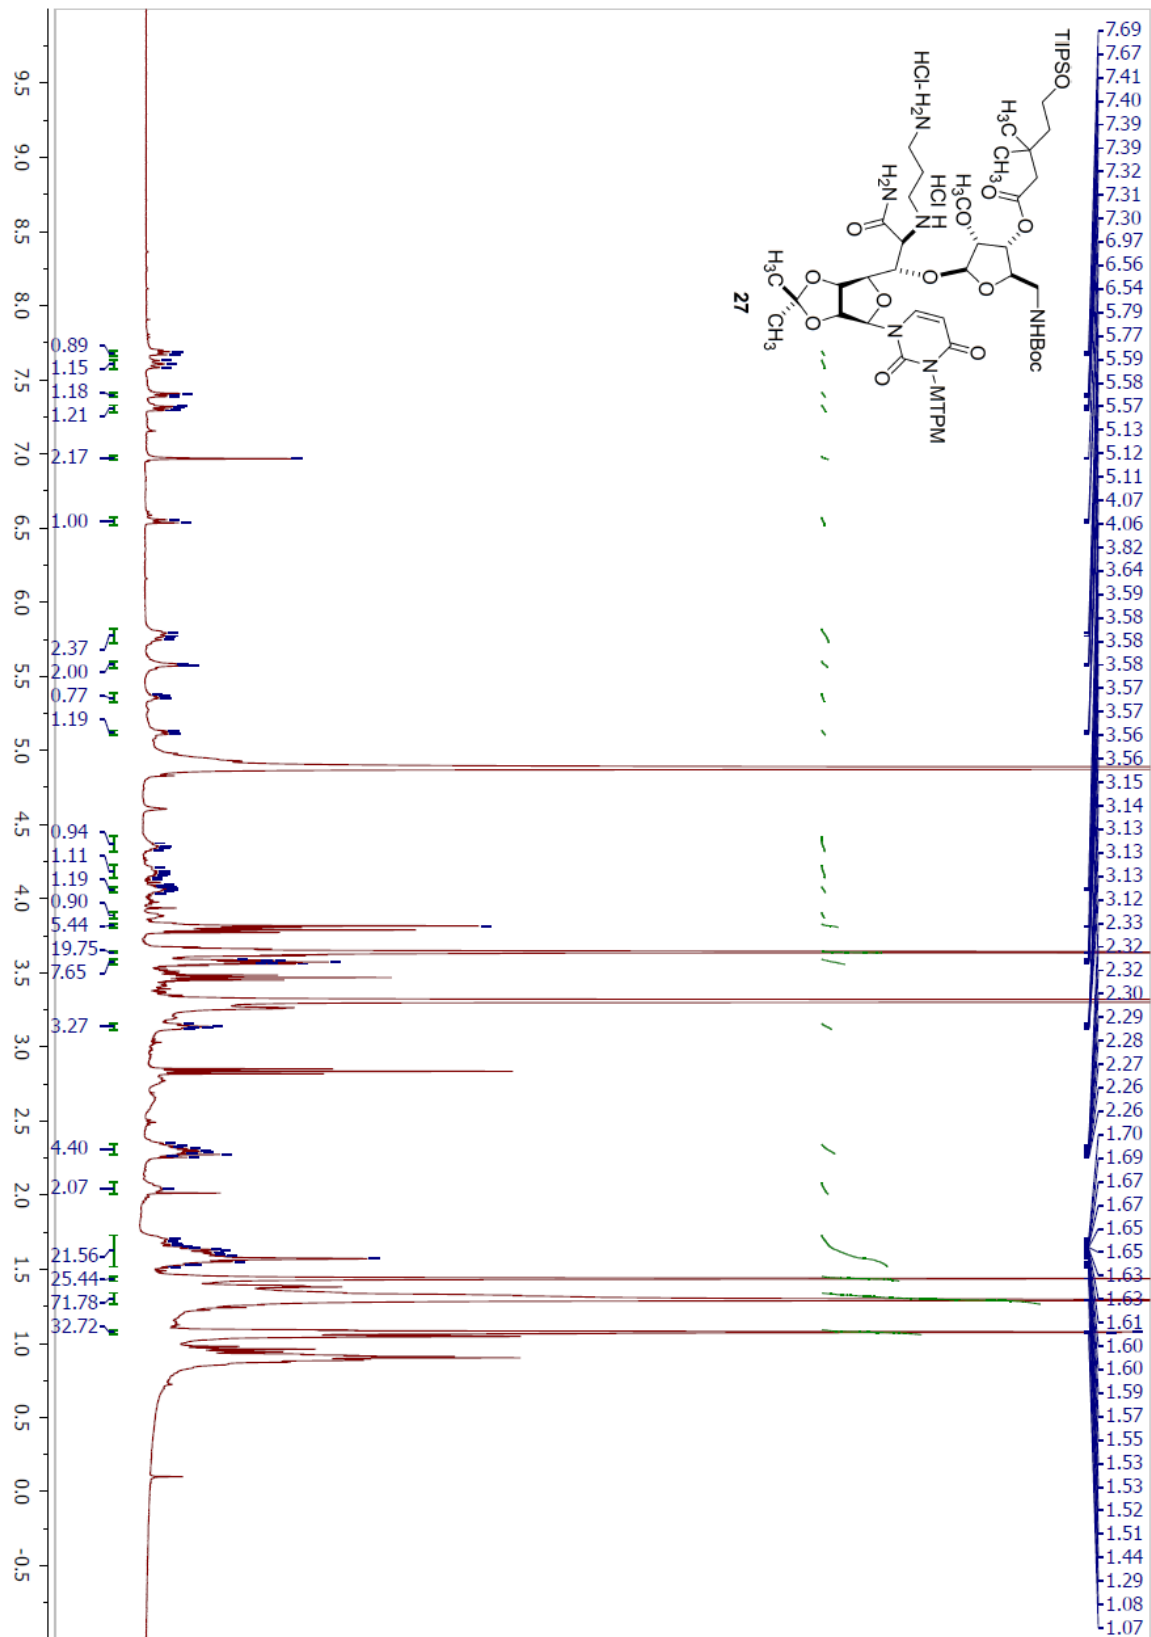

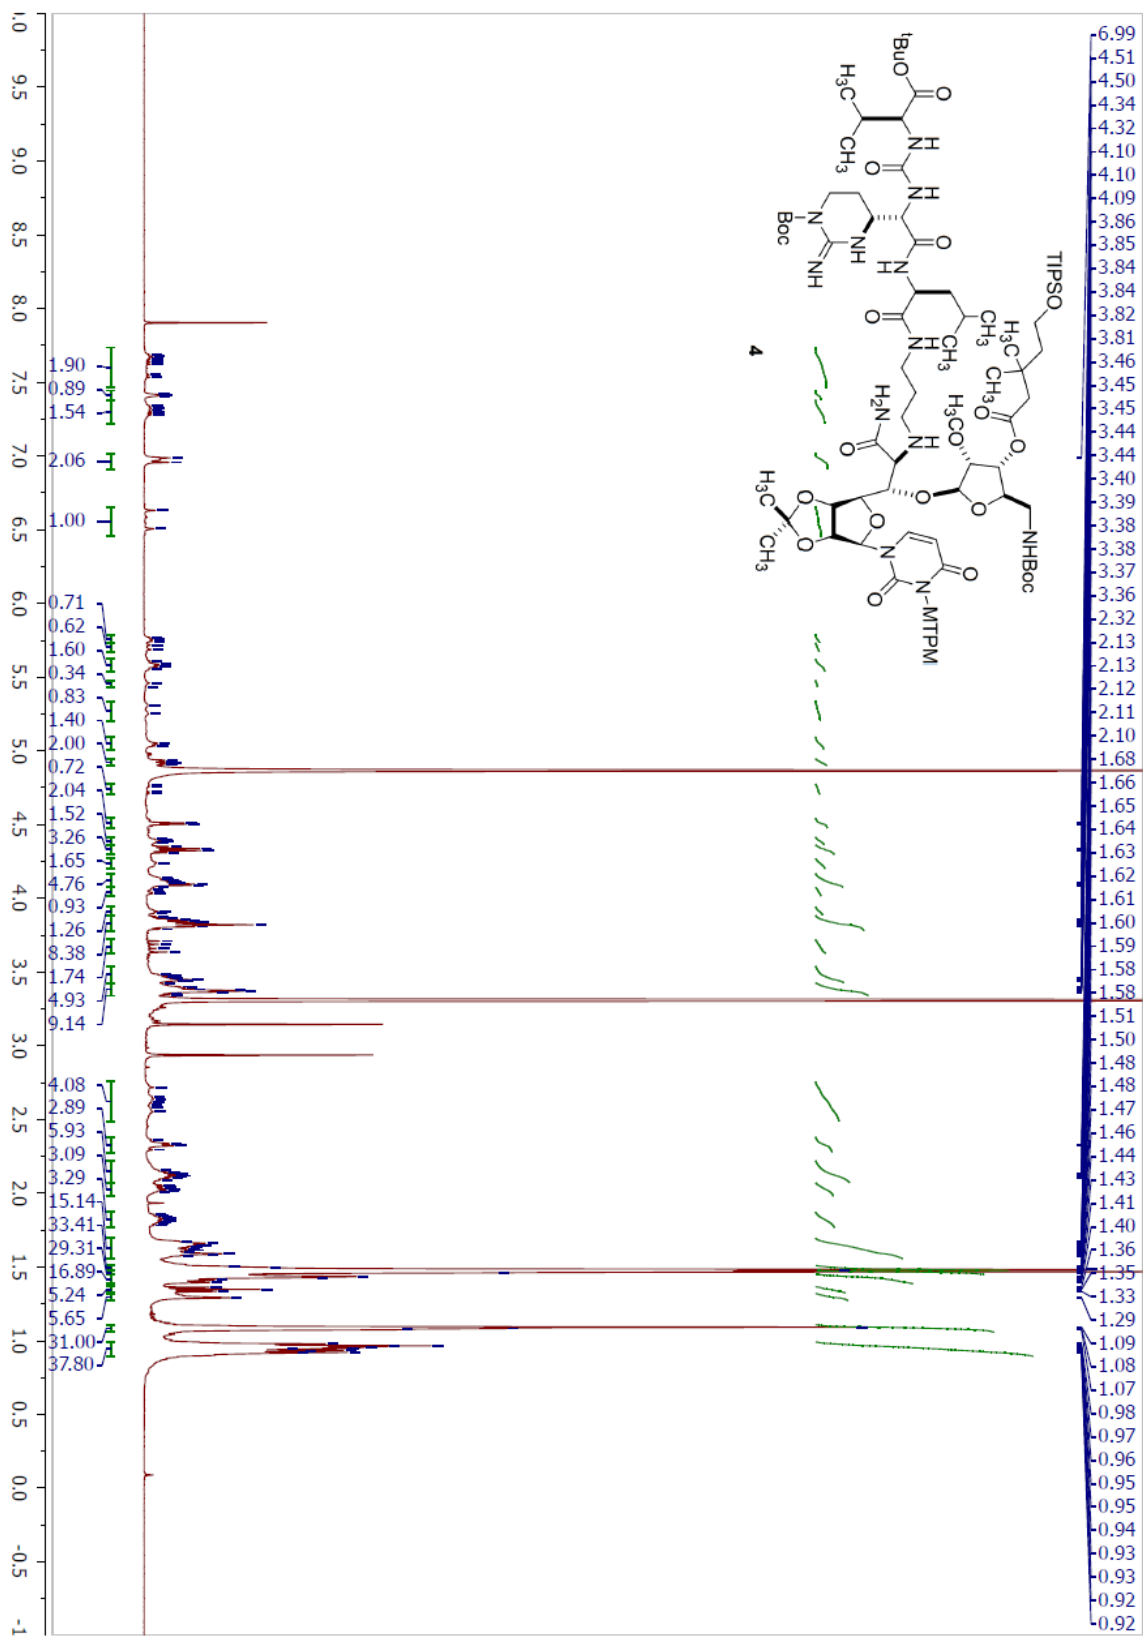

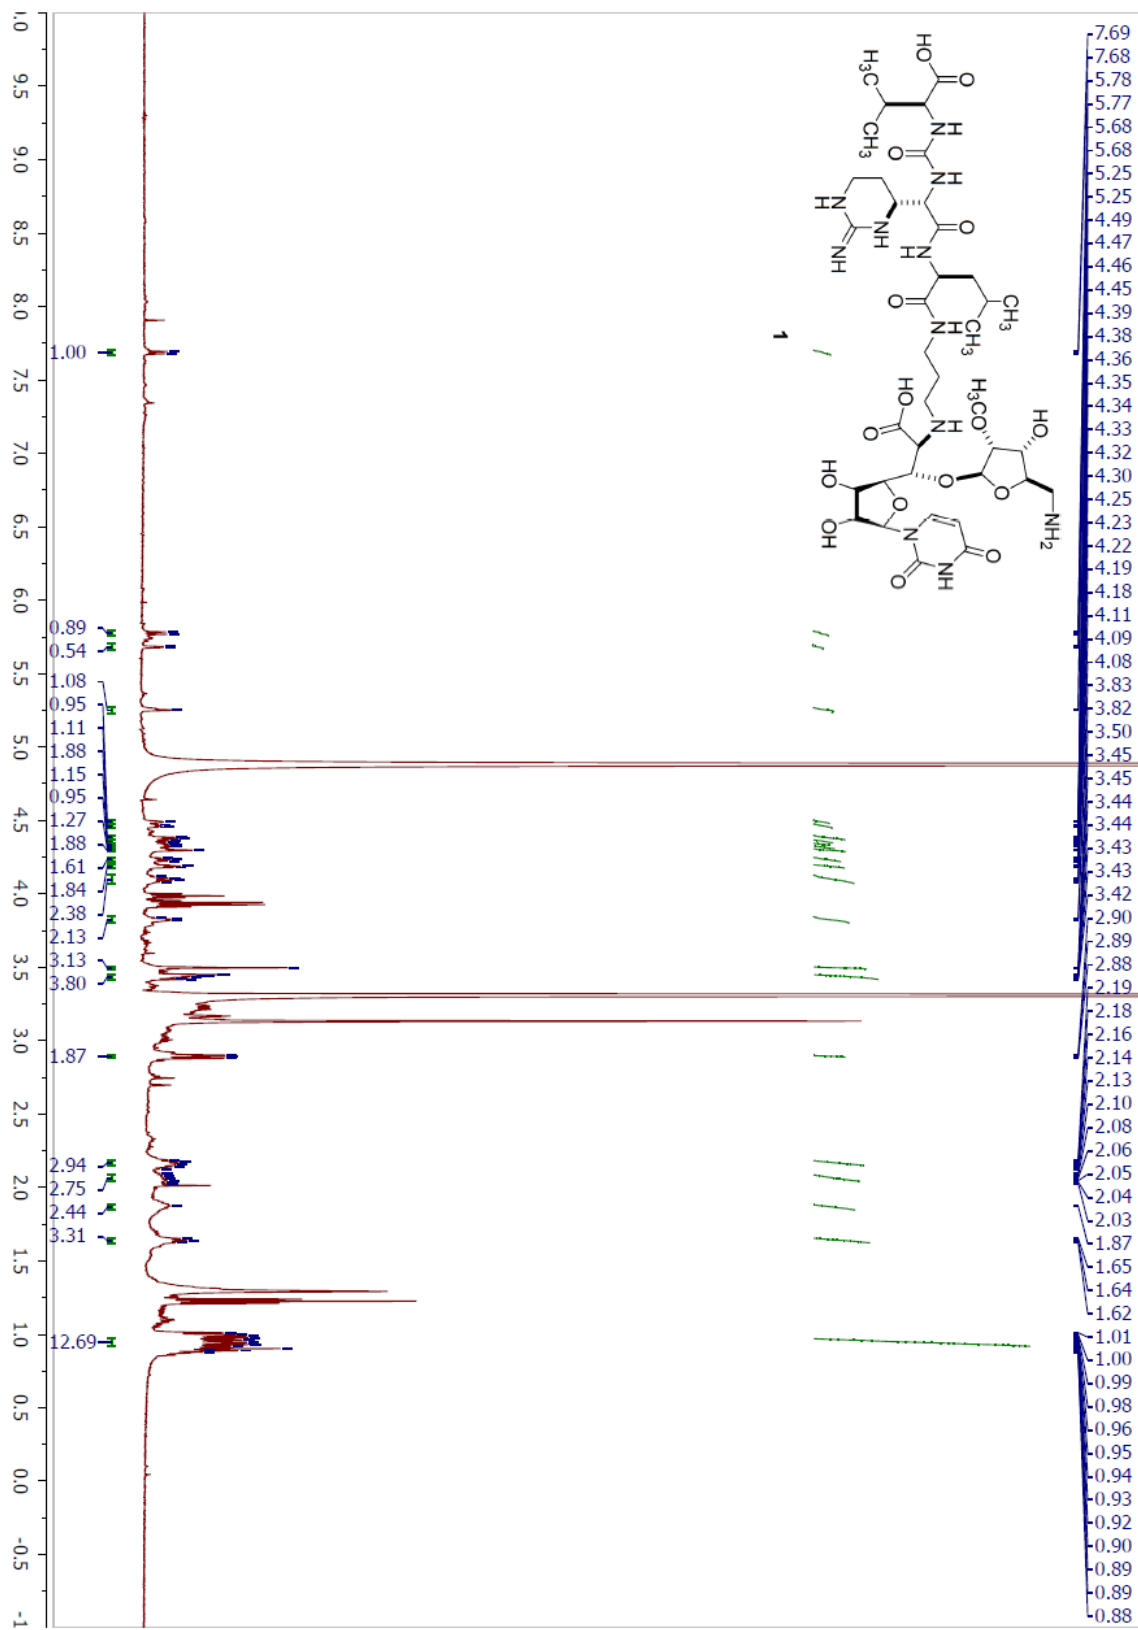

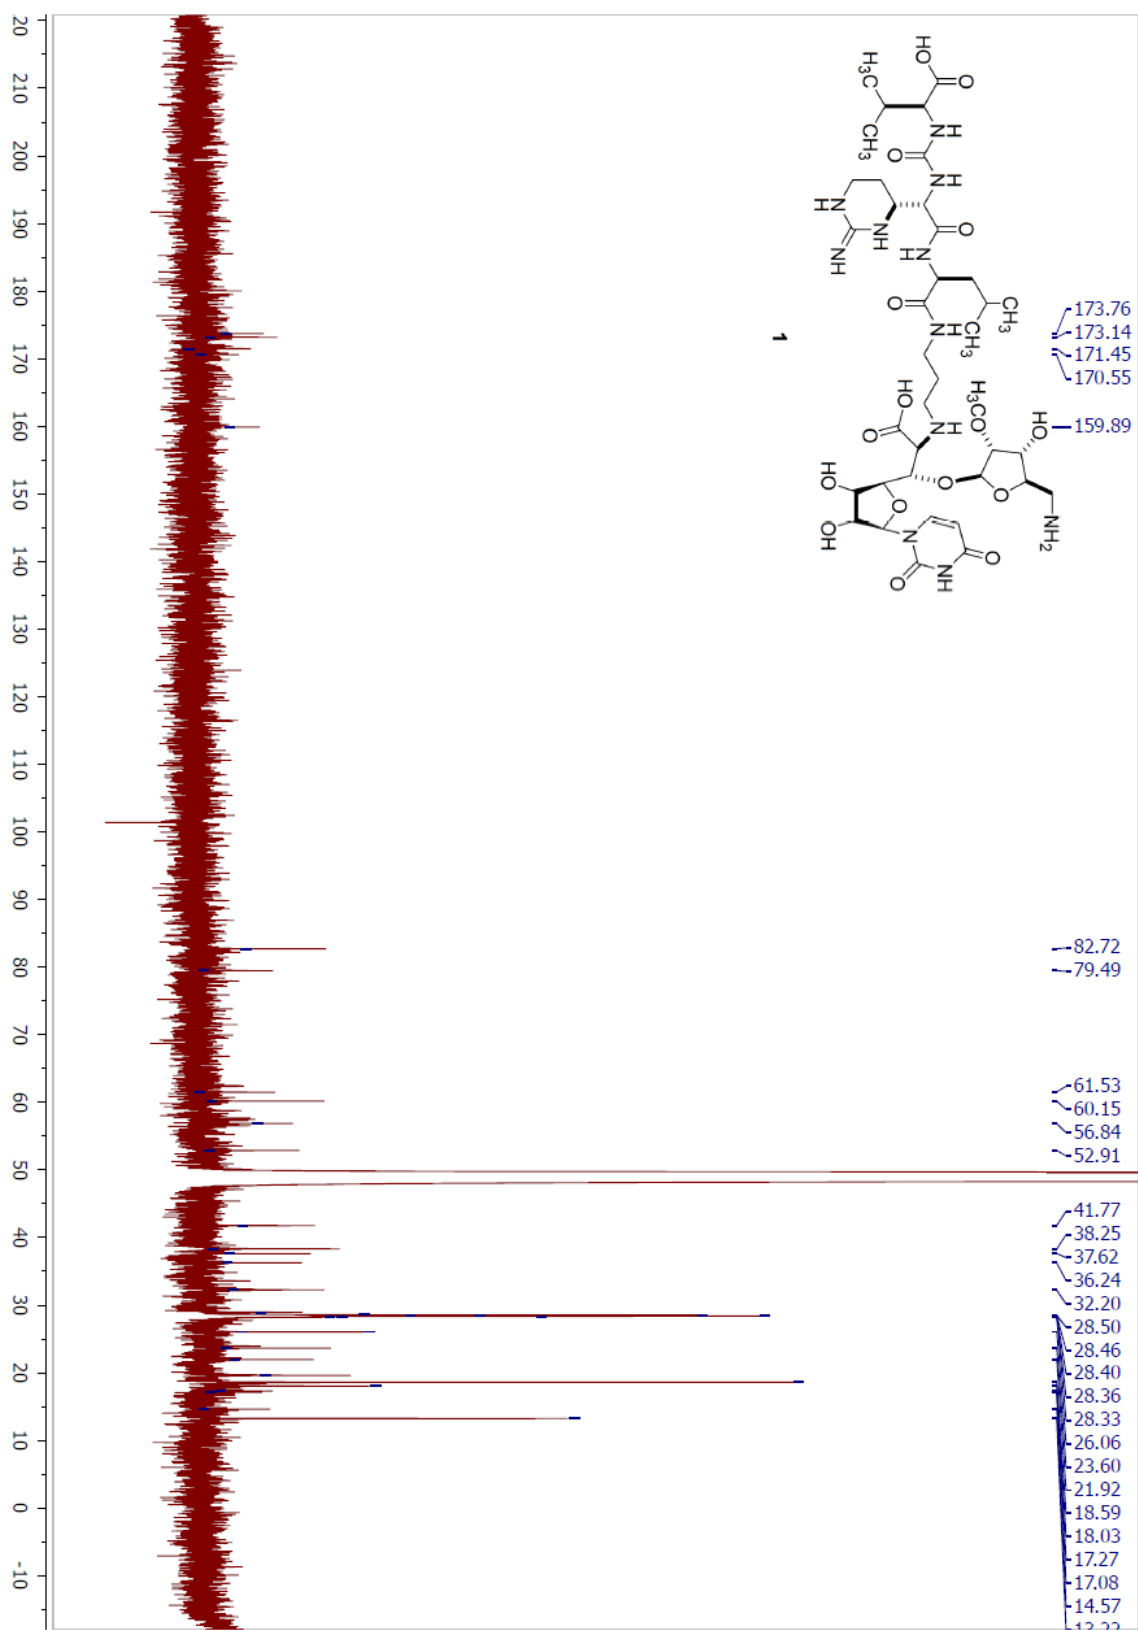



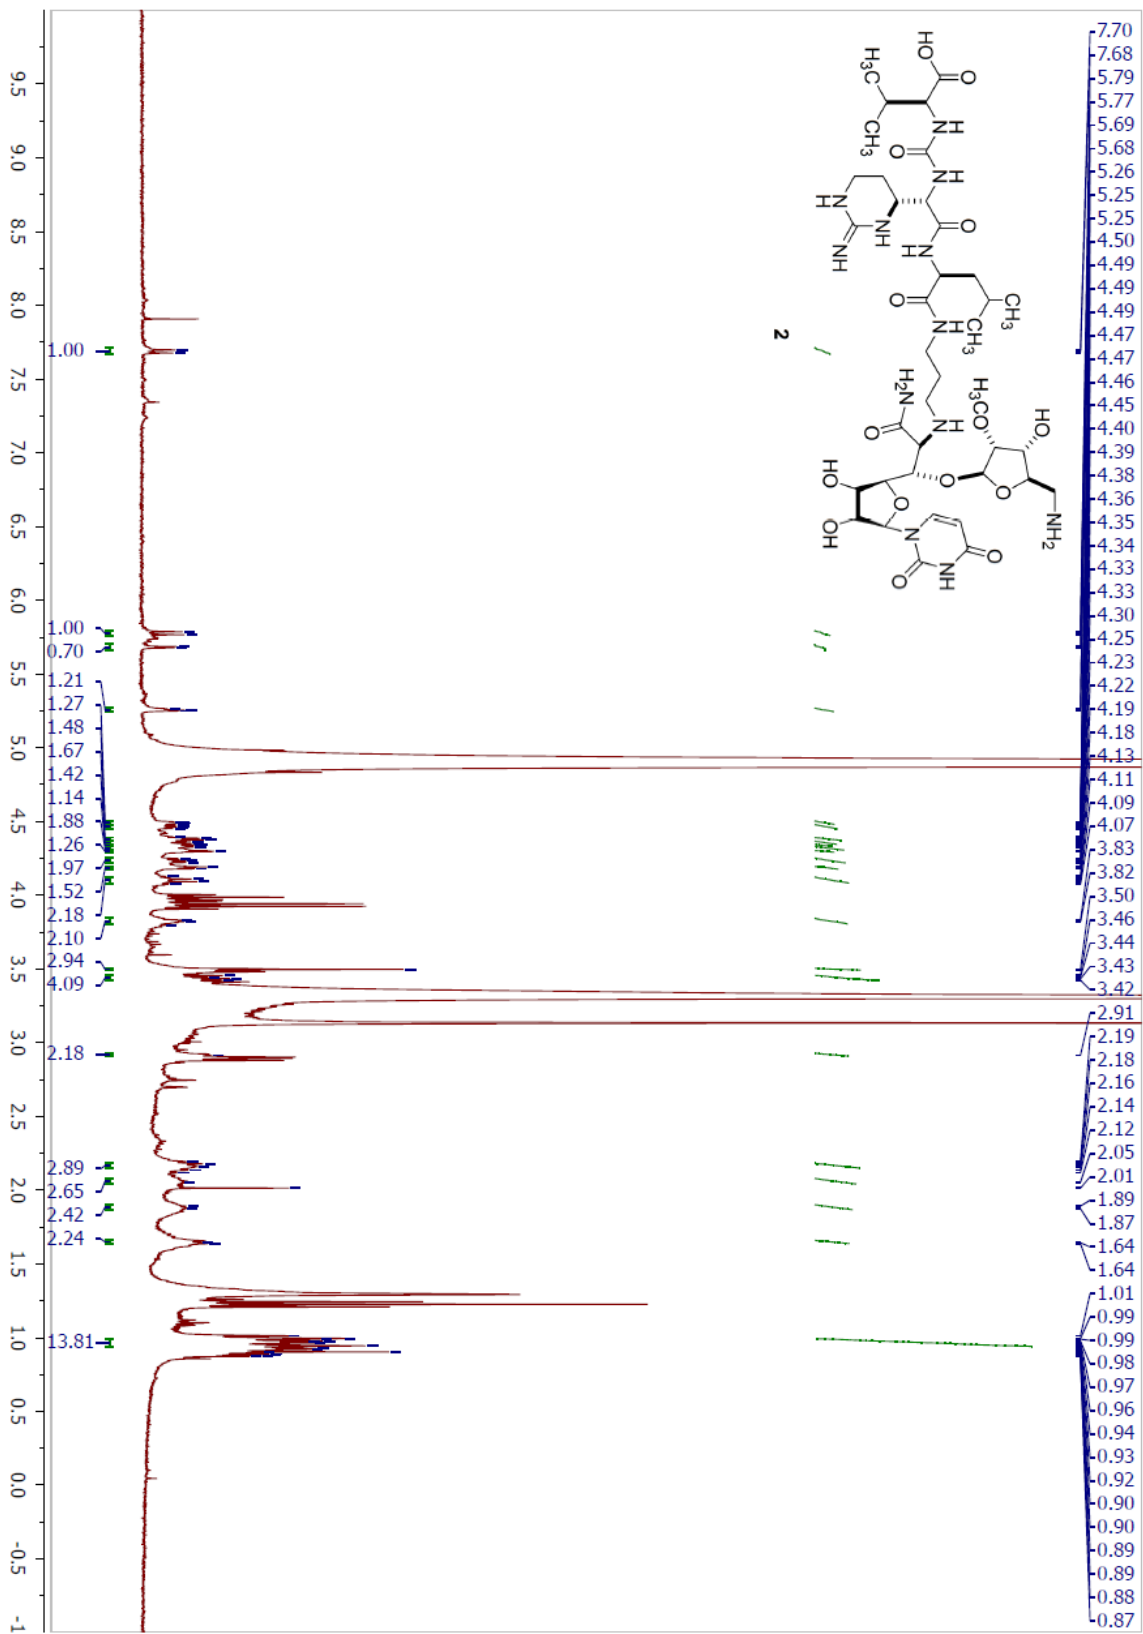

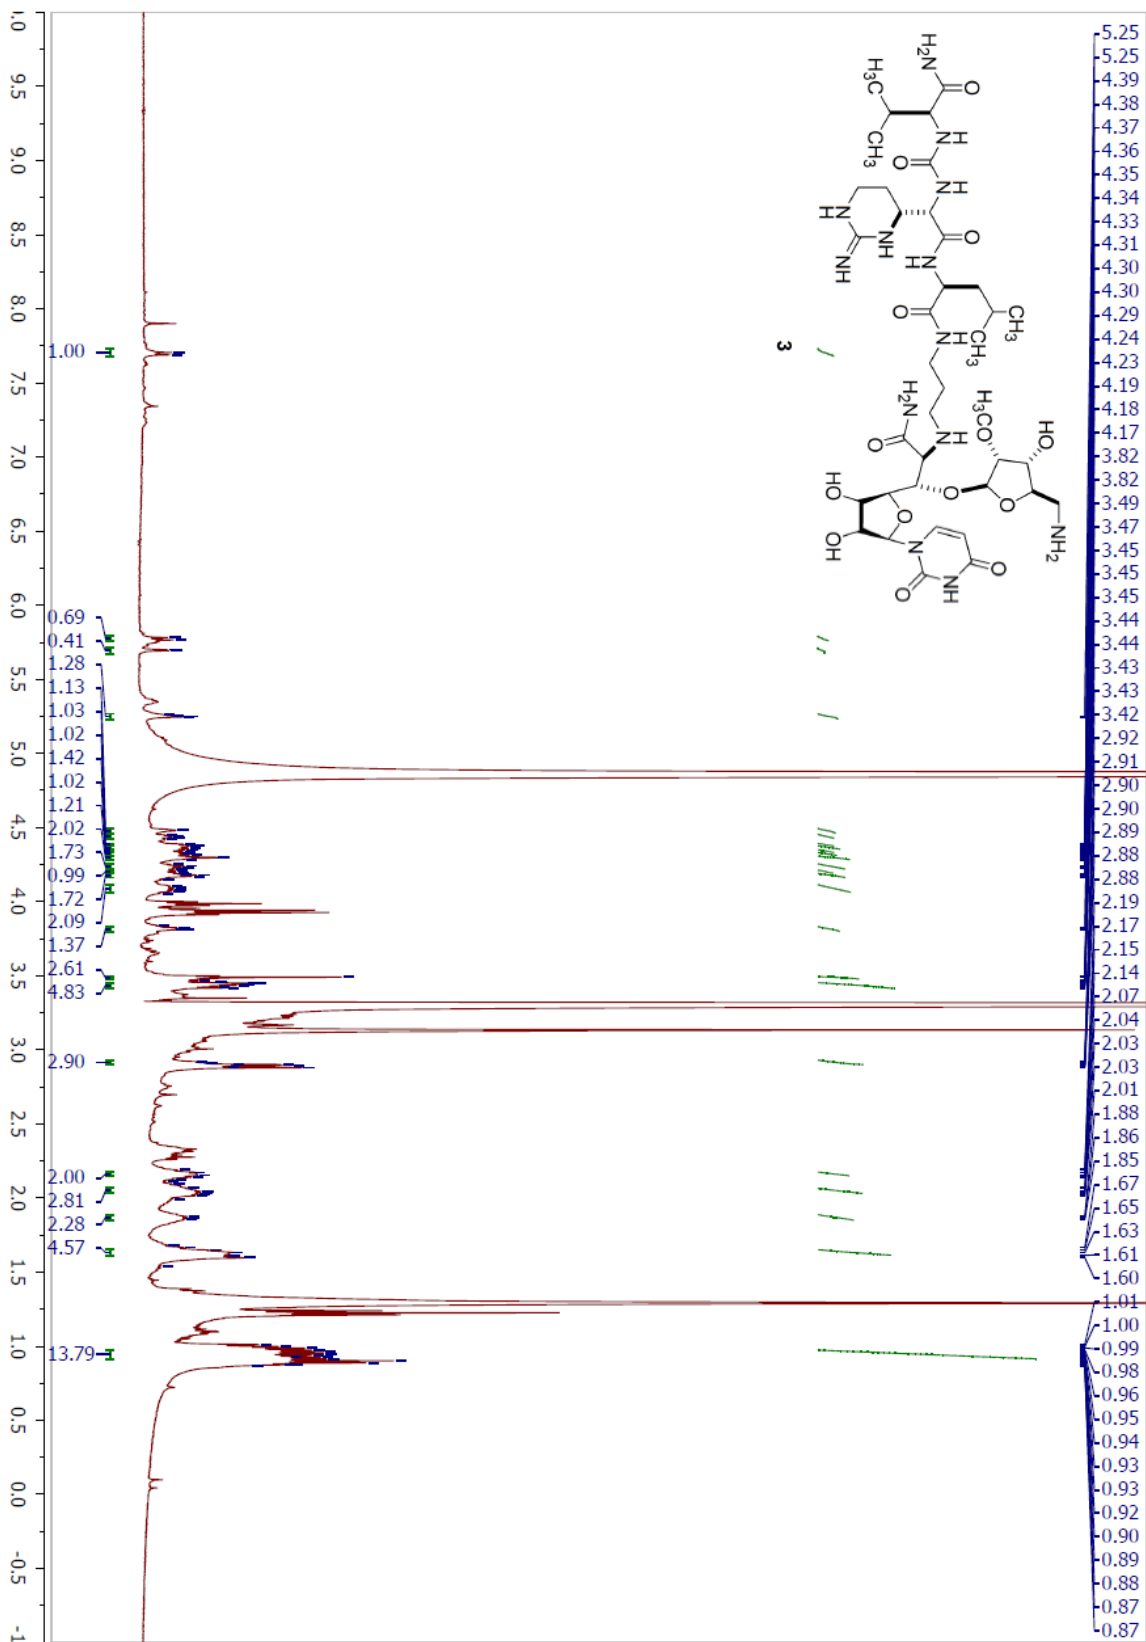

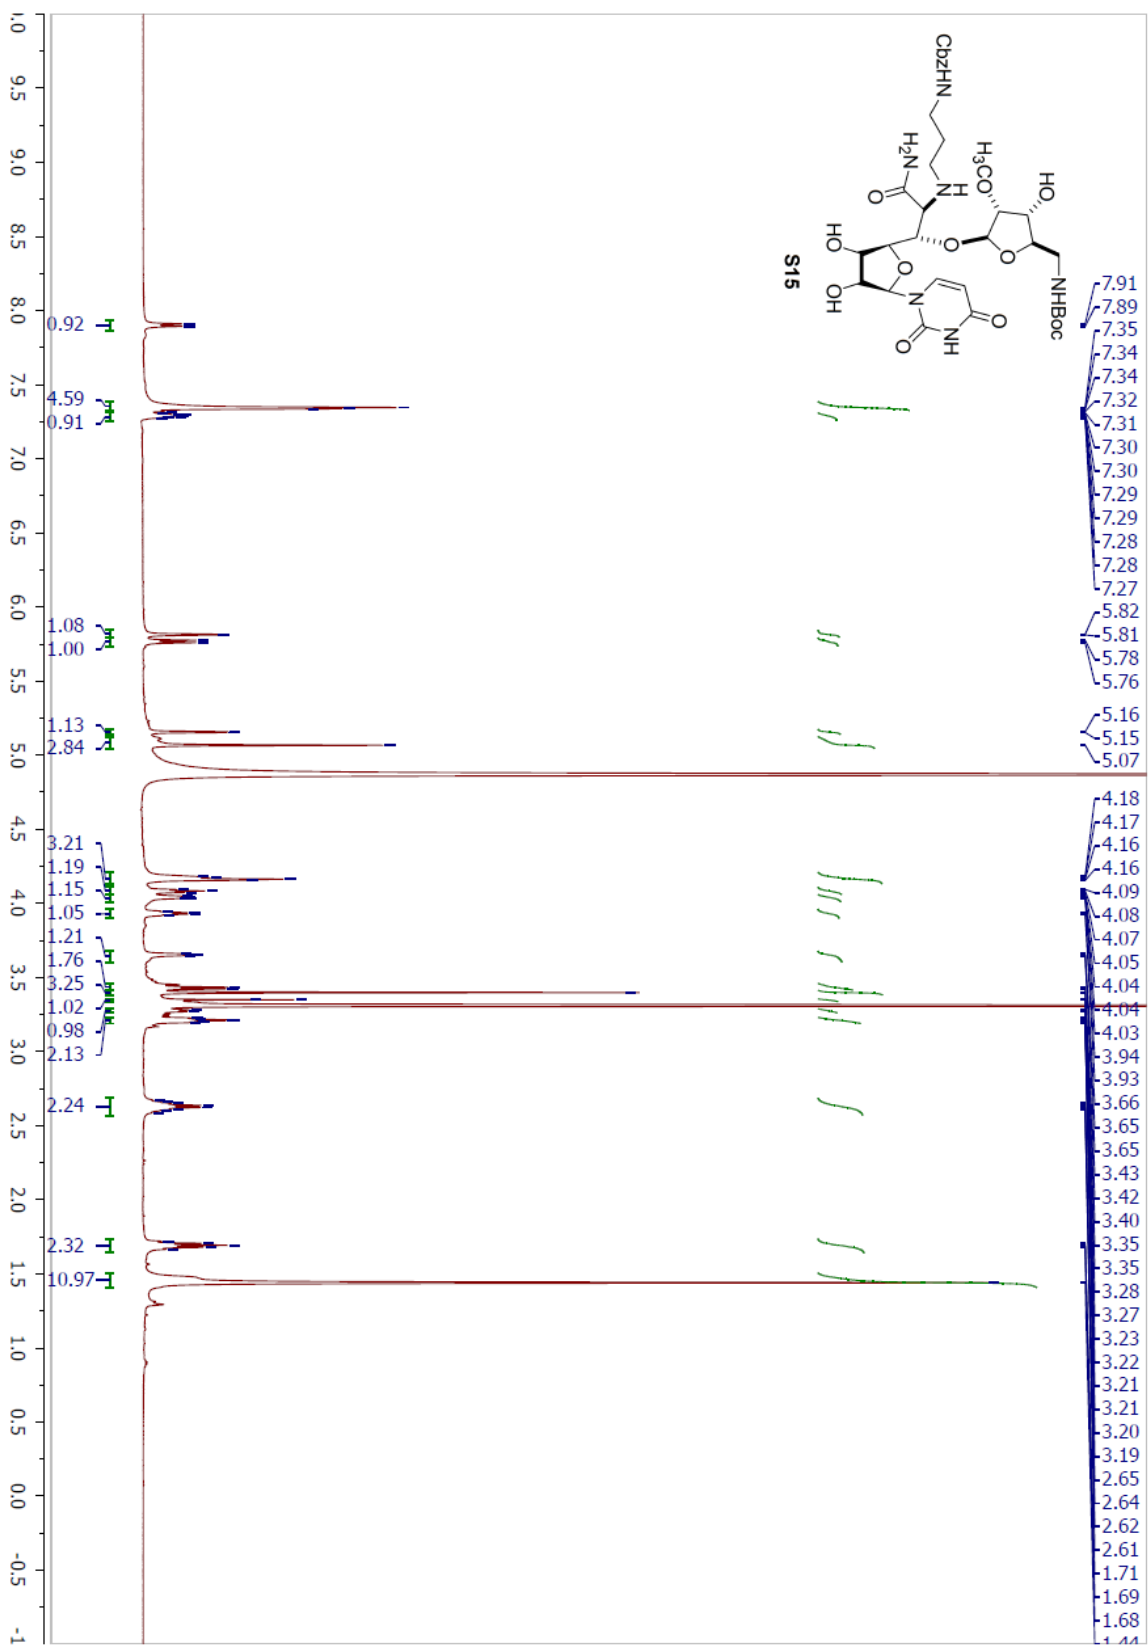

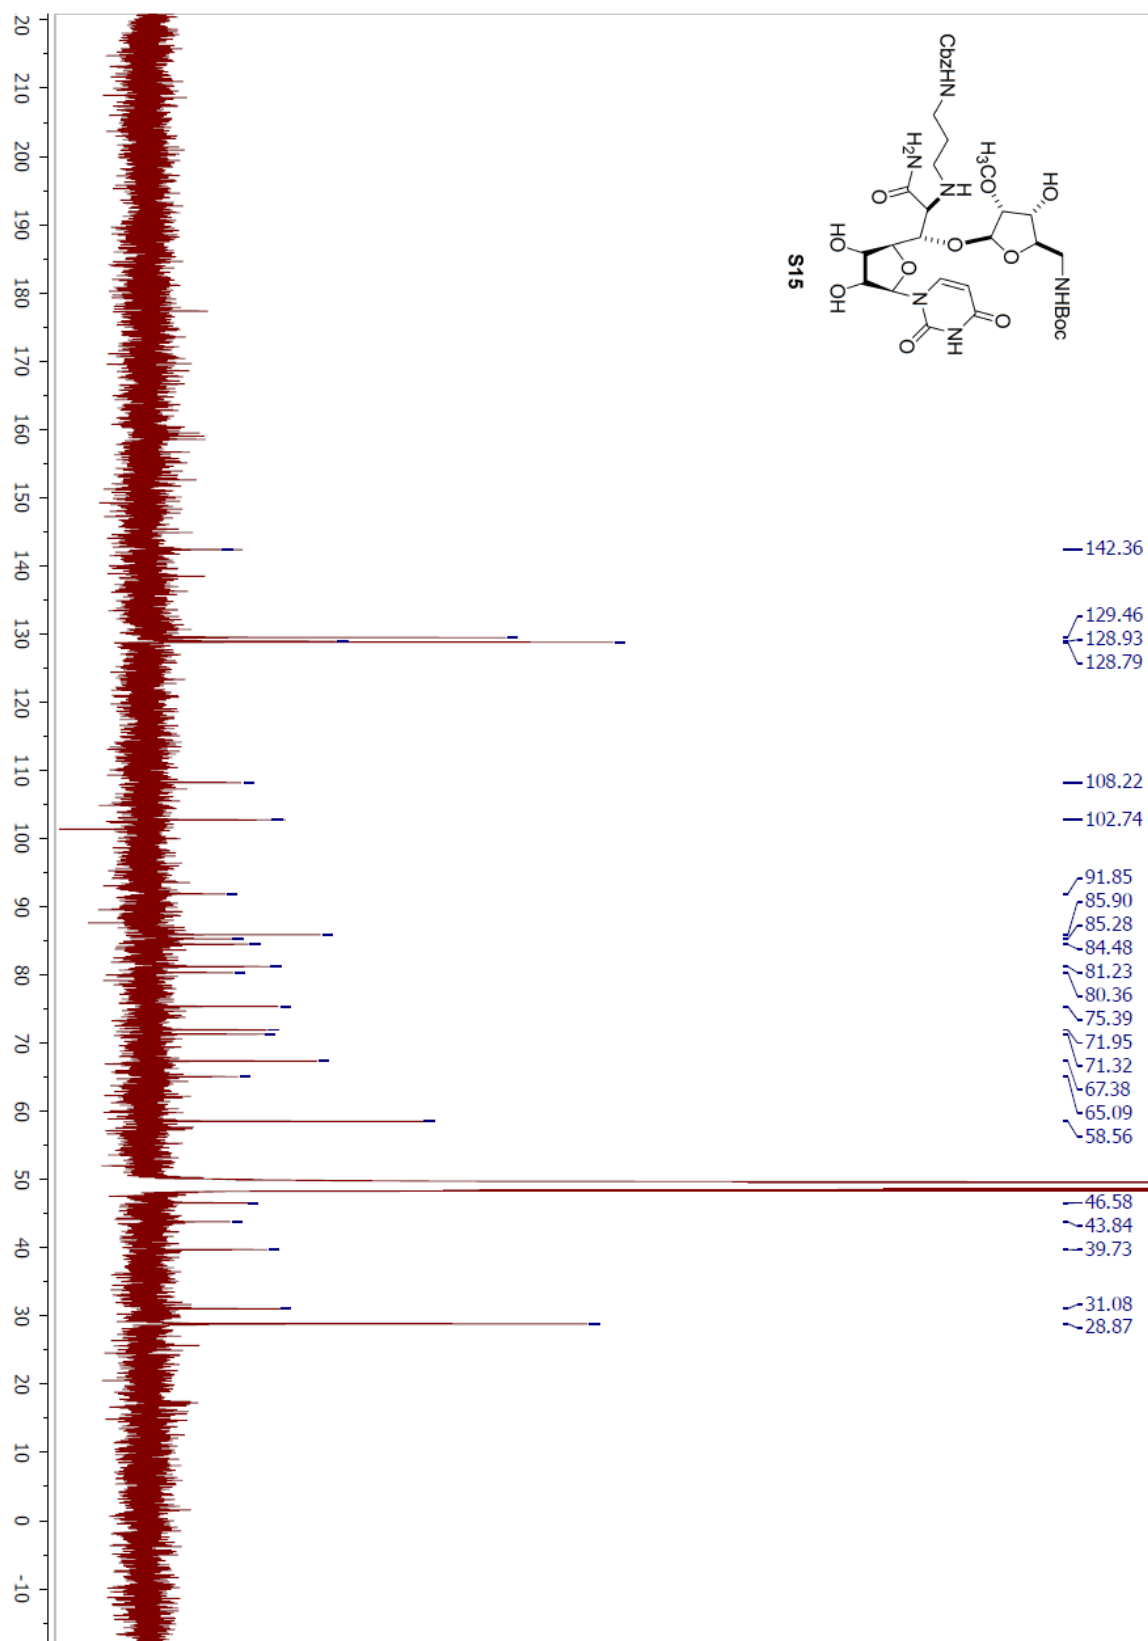

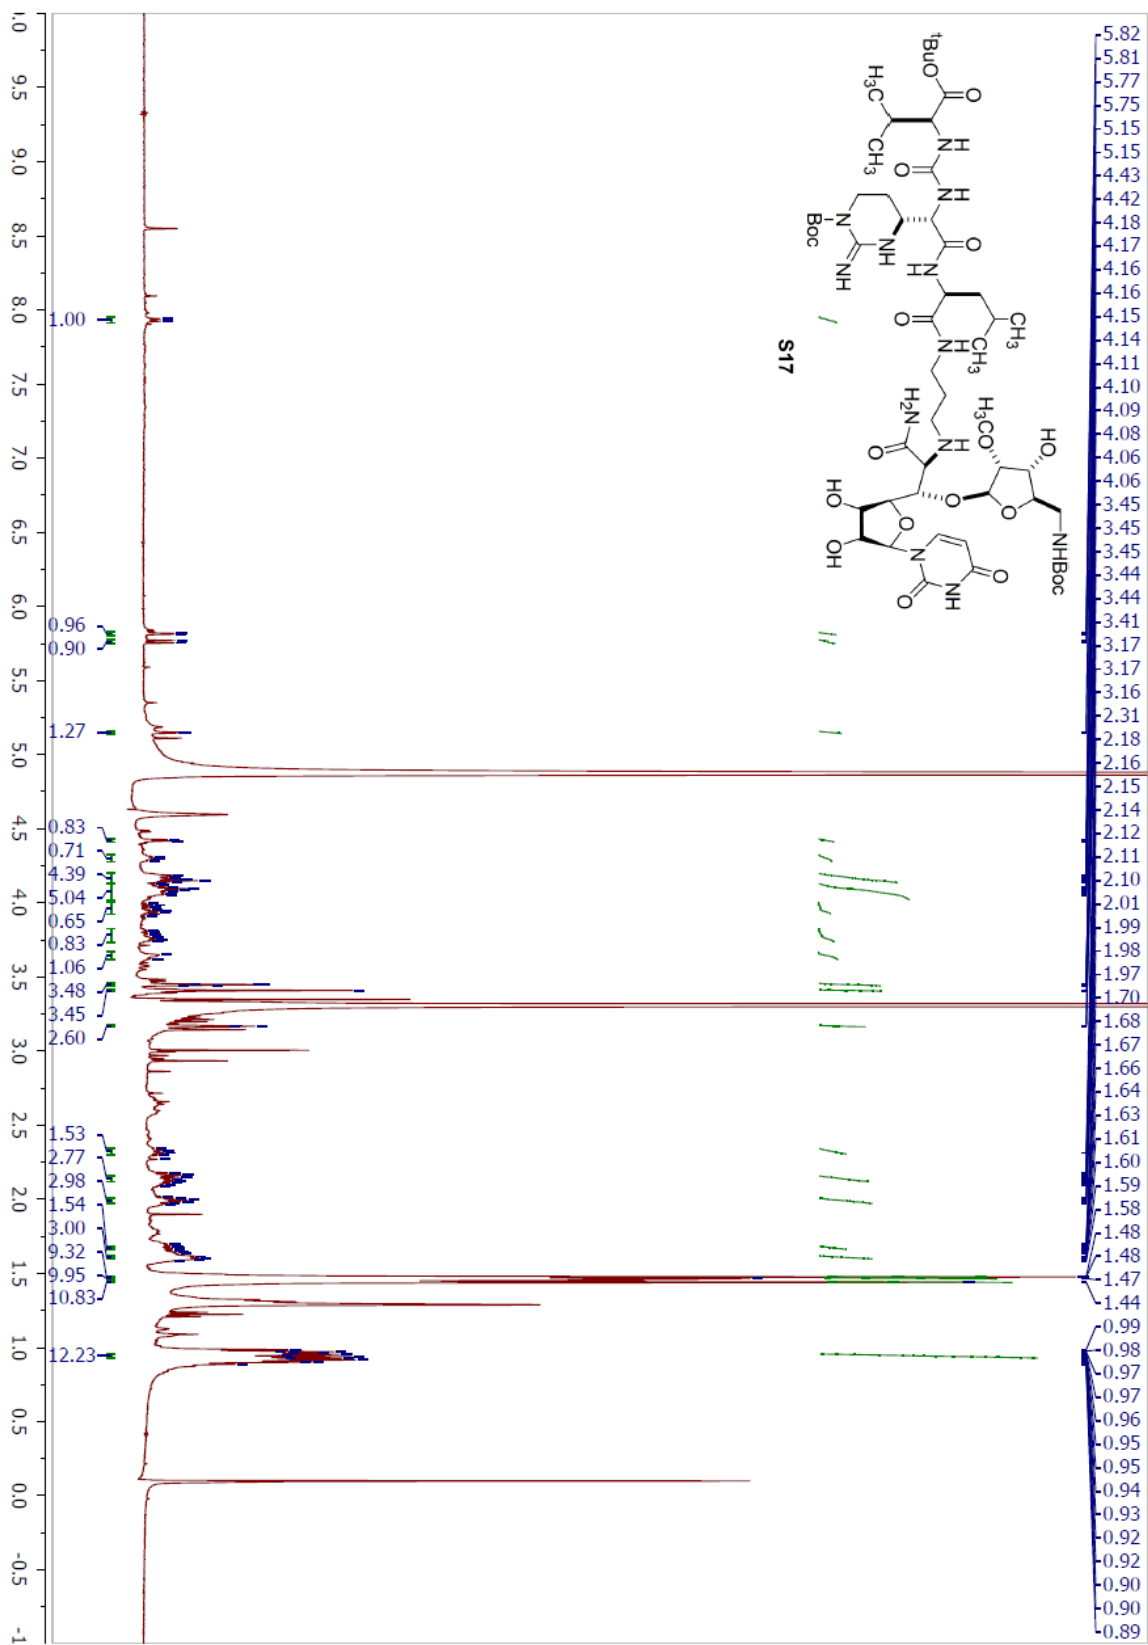

Supplement: NIHMS816335-supplement-Supporting_Information.pdf [file NIHMS816335-supplement-Supporting_Information.pdf]
